# Supplementary material for: Influence of Magnetic Field Strength on Magnetic Resonance Imaging Radiomics Features in Brain Imaging, an In Vitro and In Vivo Study
Source: PubMed Central journal article supplement (PMC7855708; doi:10.3389/fonc.2020.541663), 2021-01-20

minValue

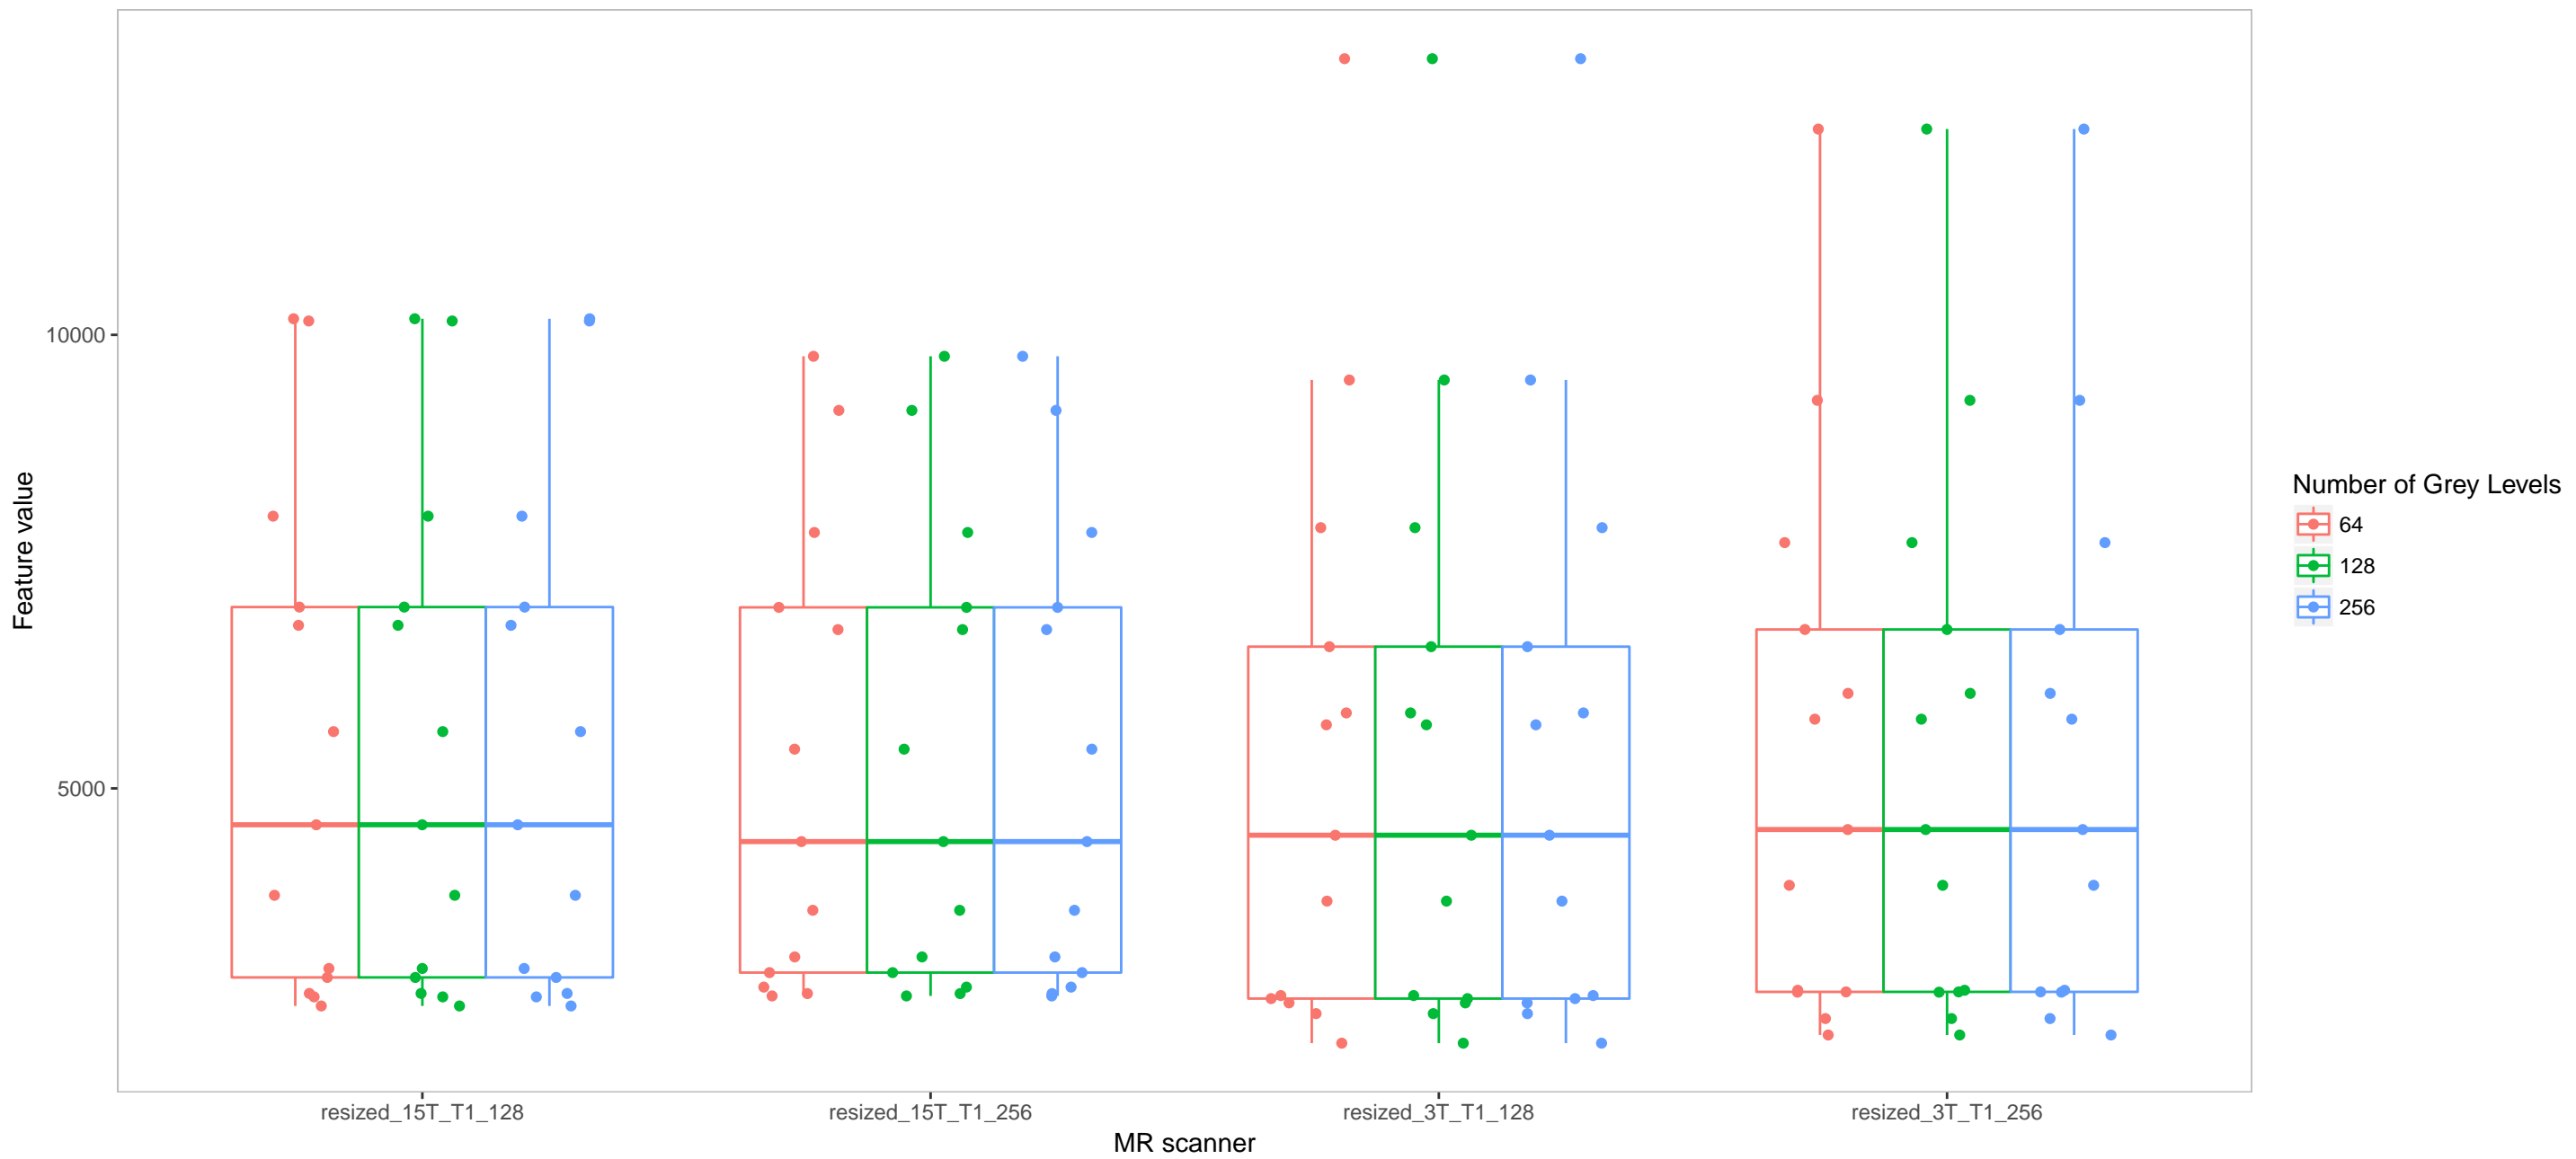

meanValue

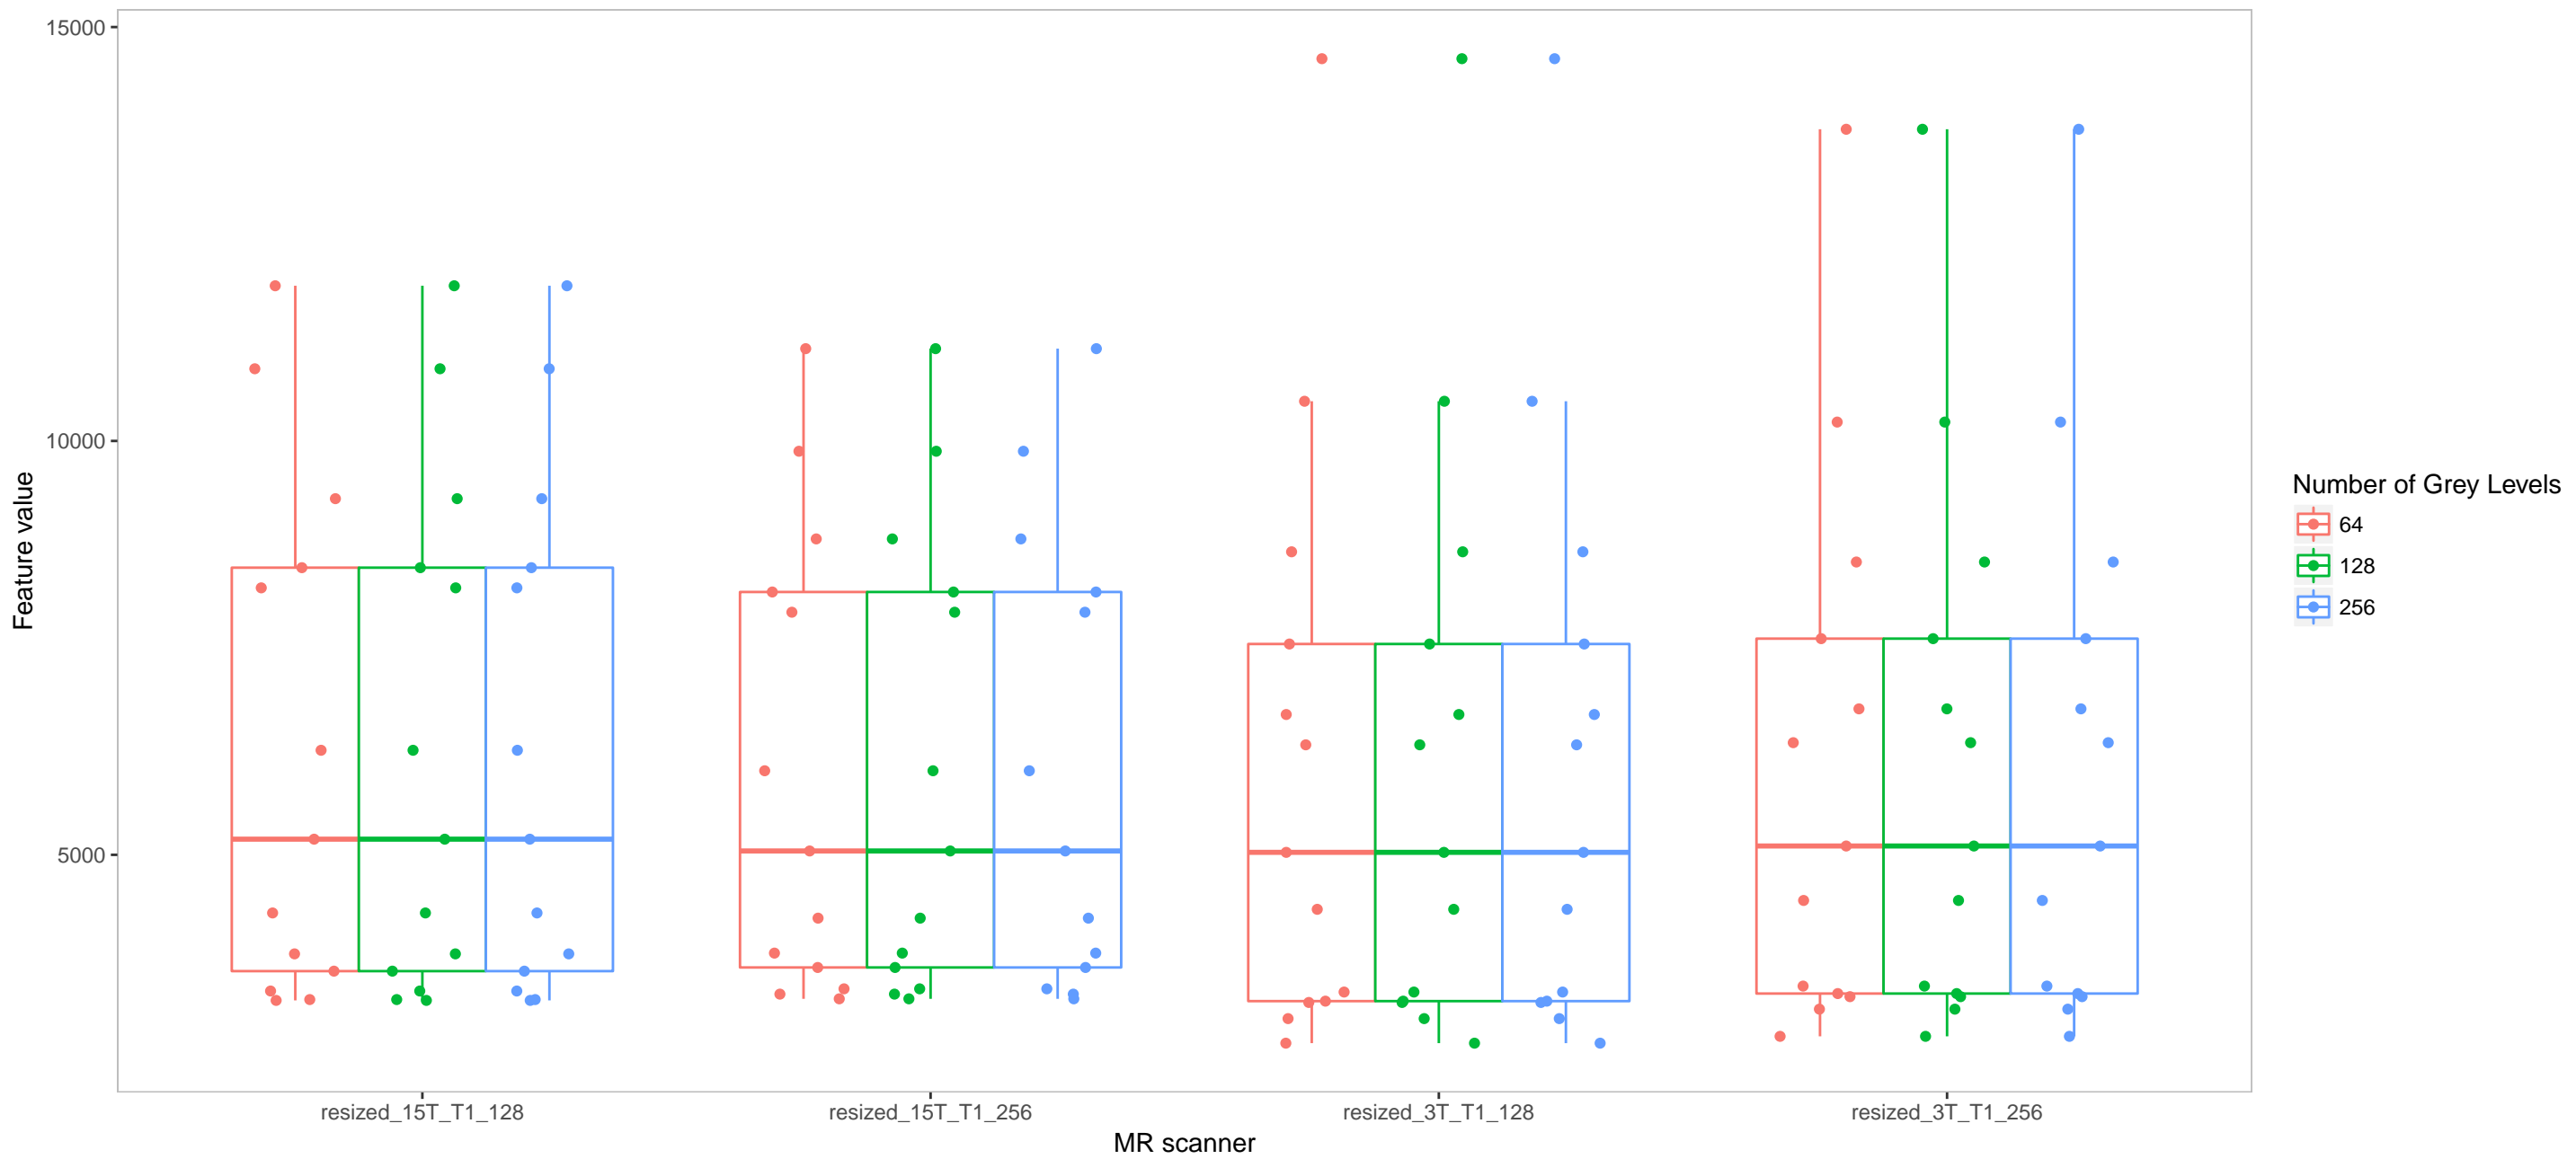

stdValue

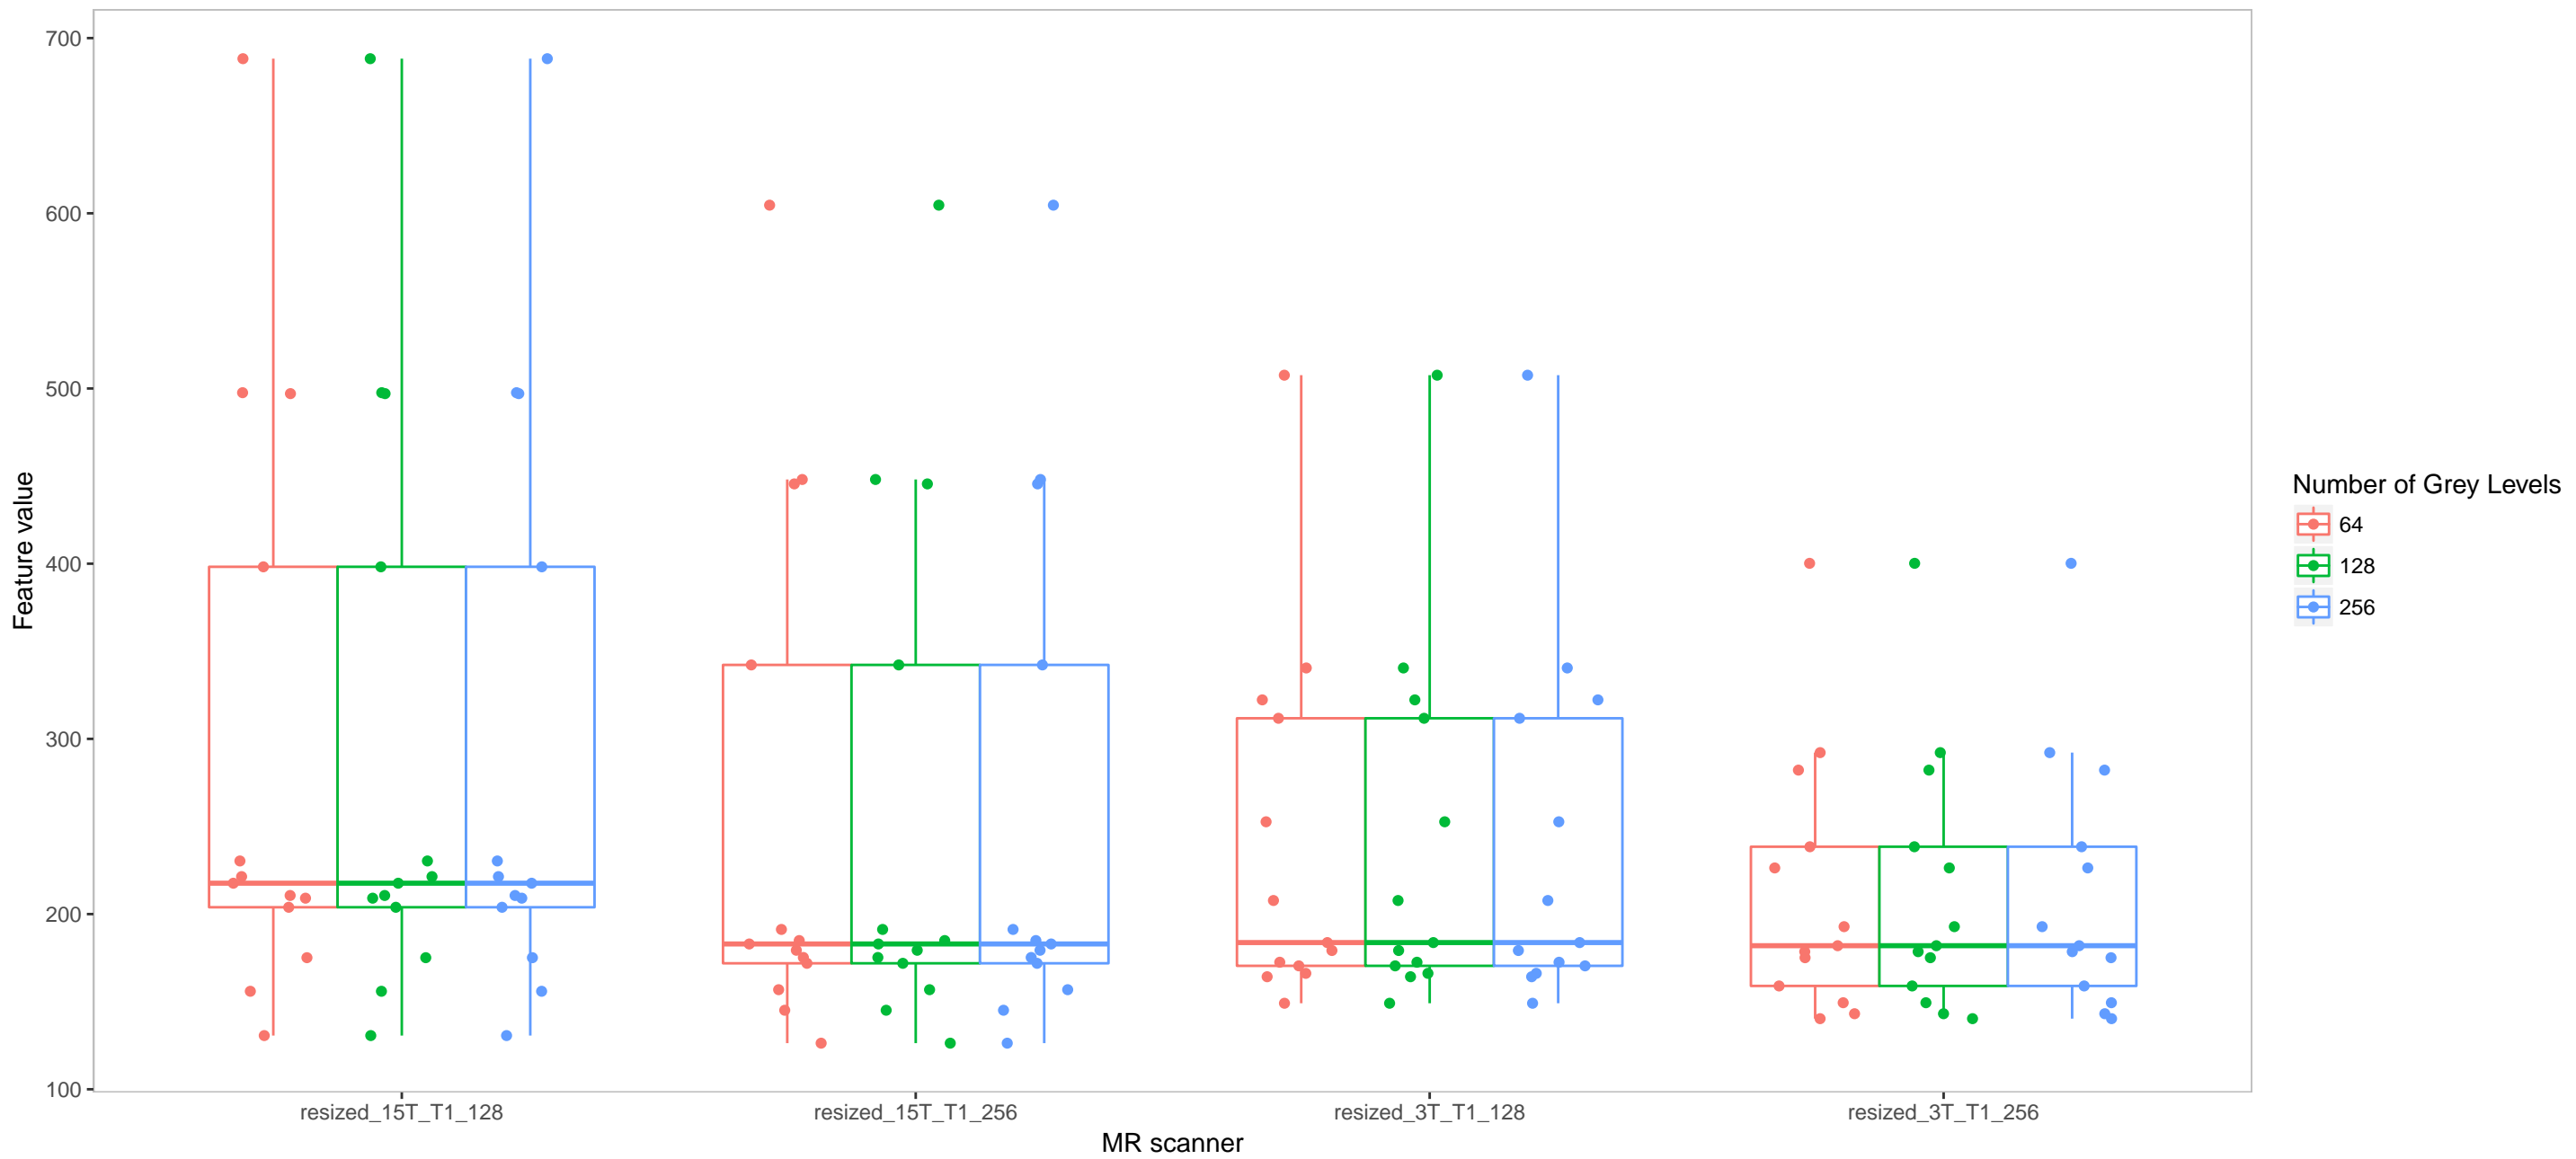

maxValue

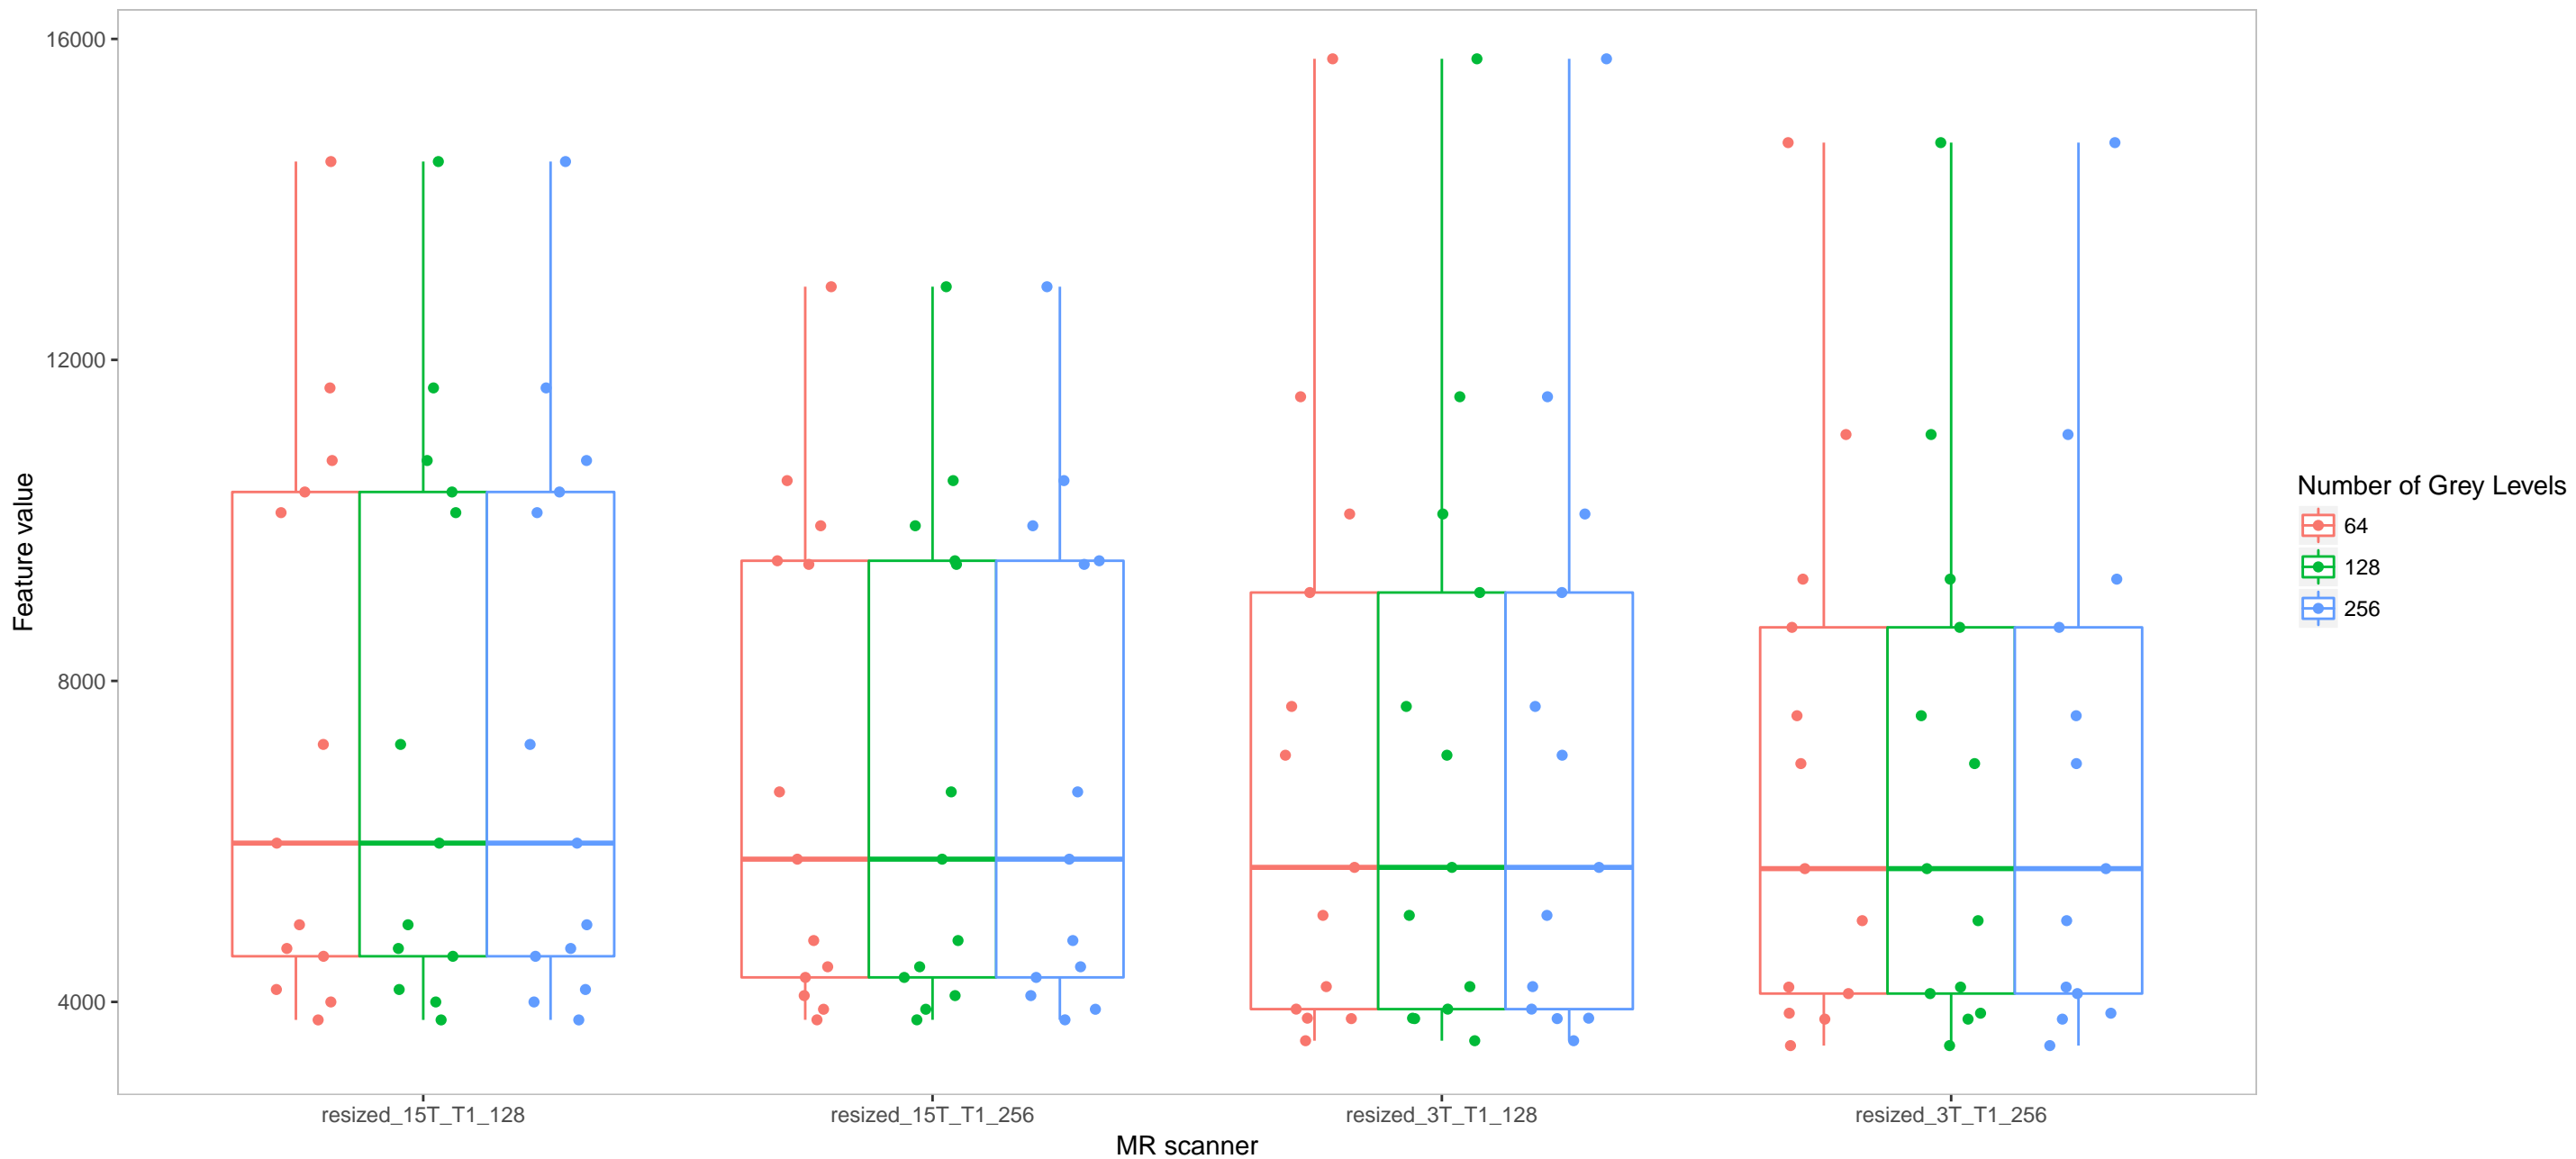

SkewnessH

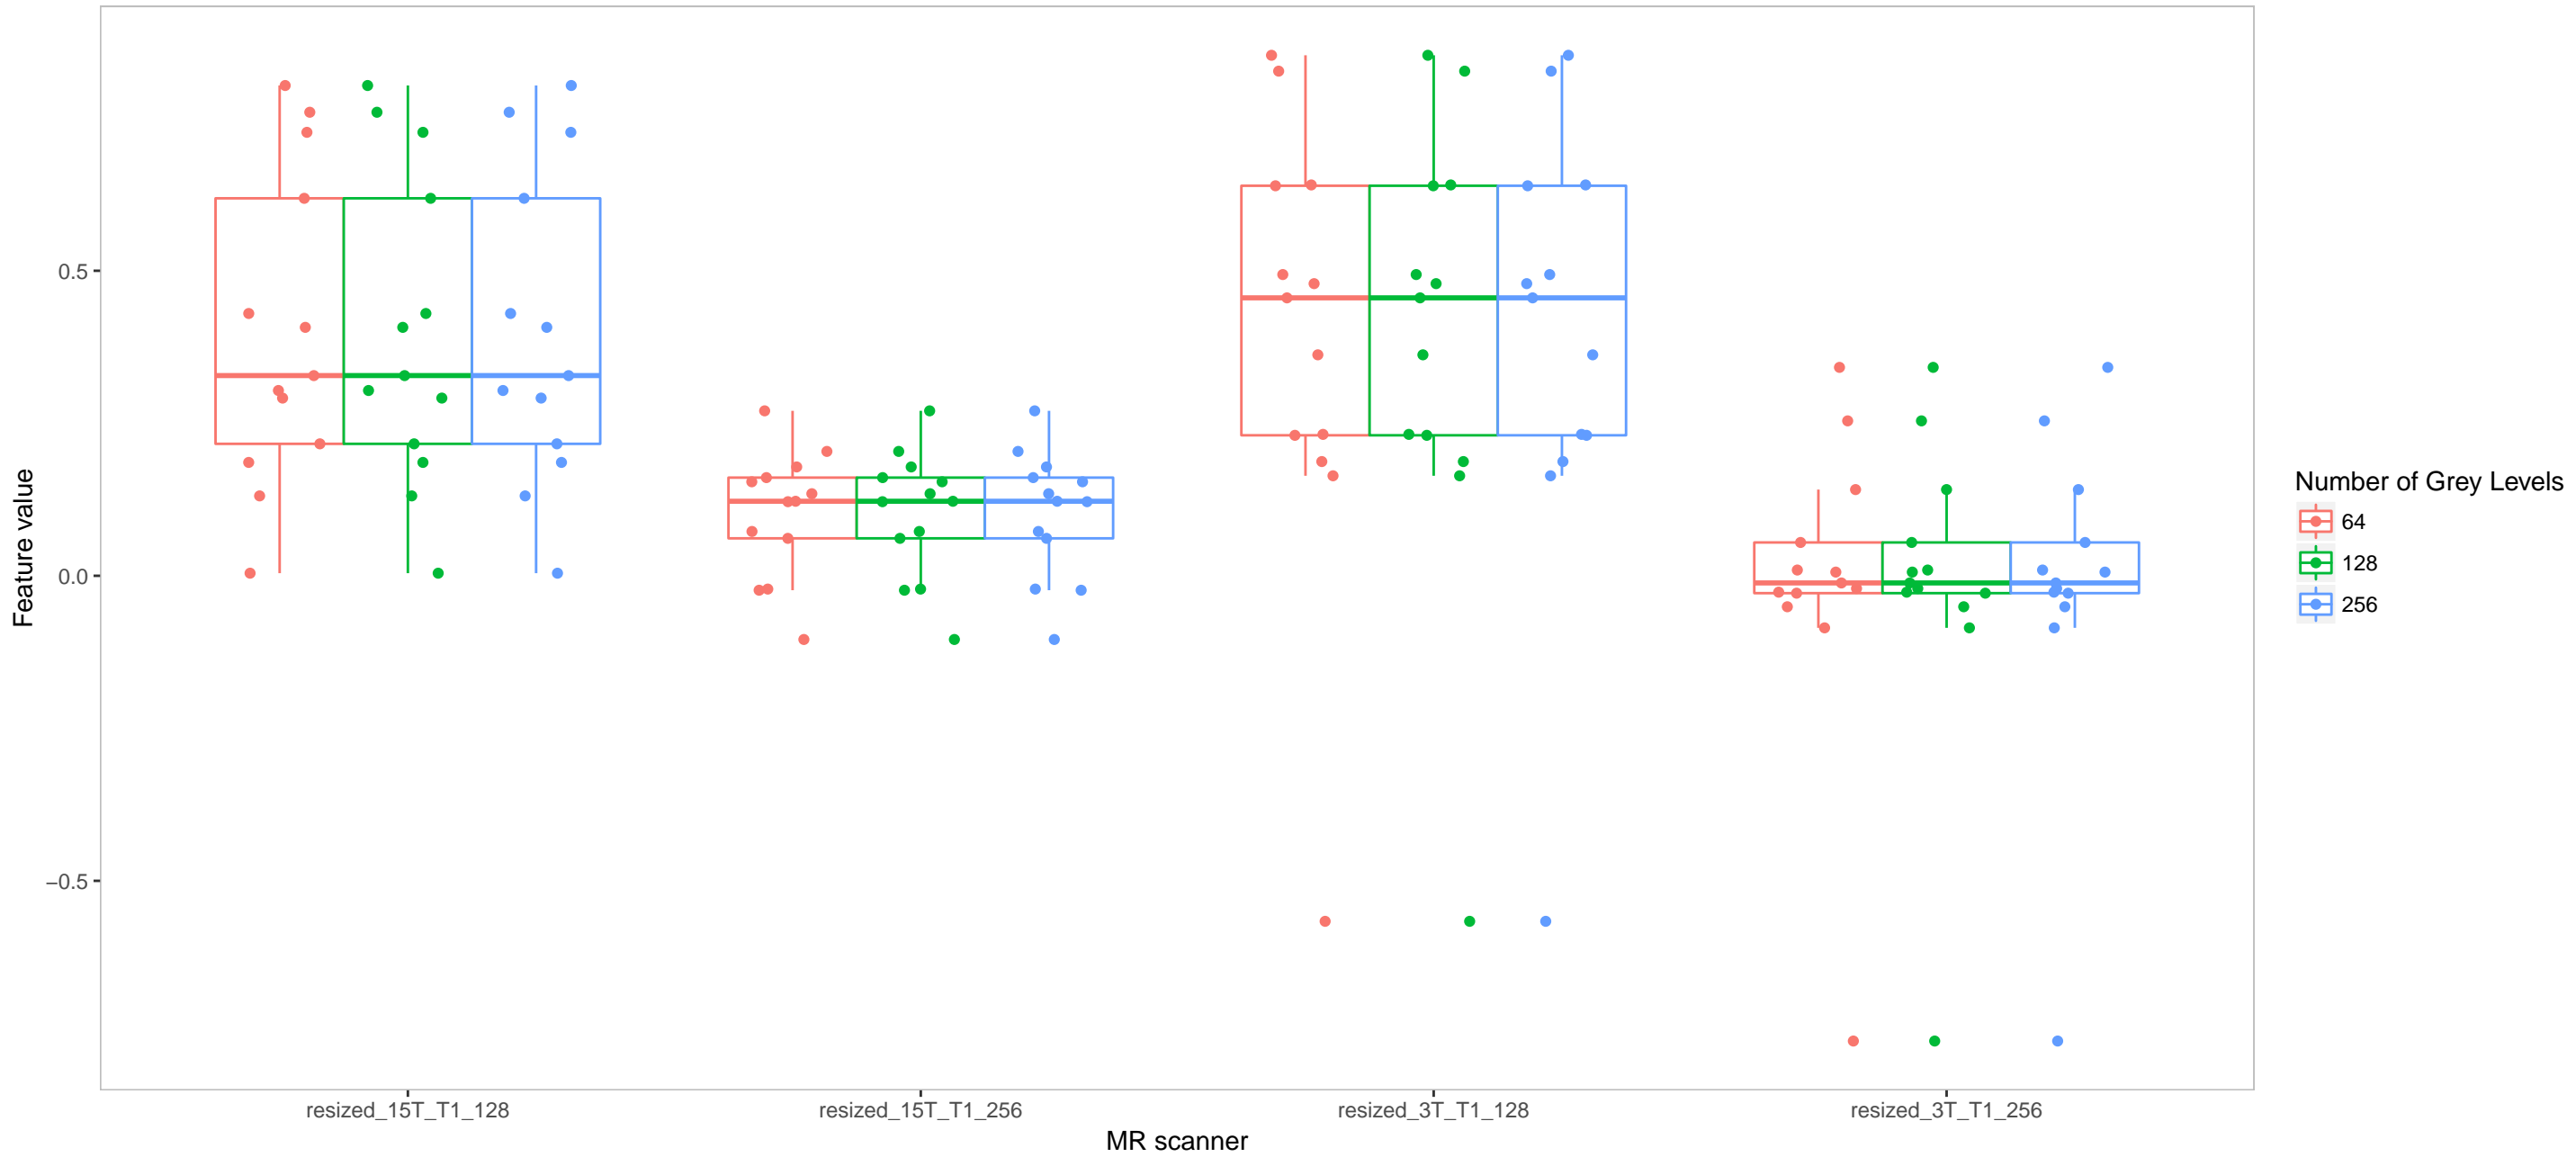

# KurtosisH

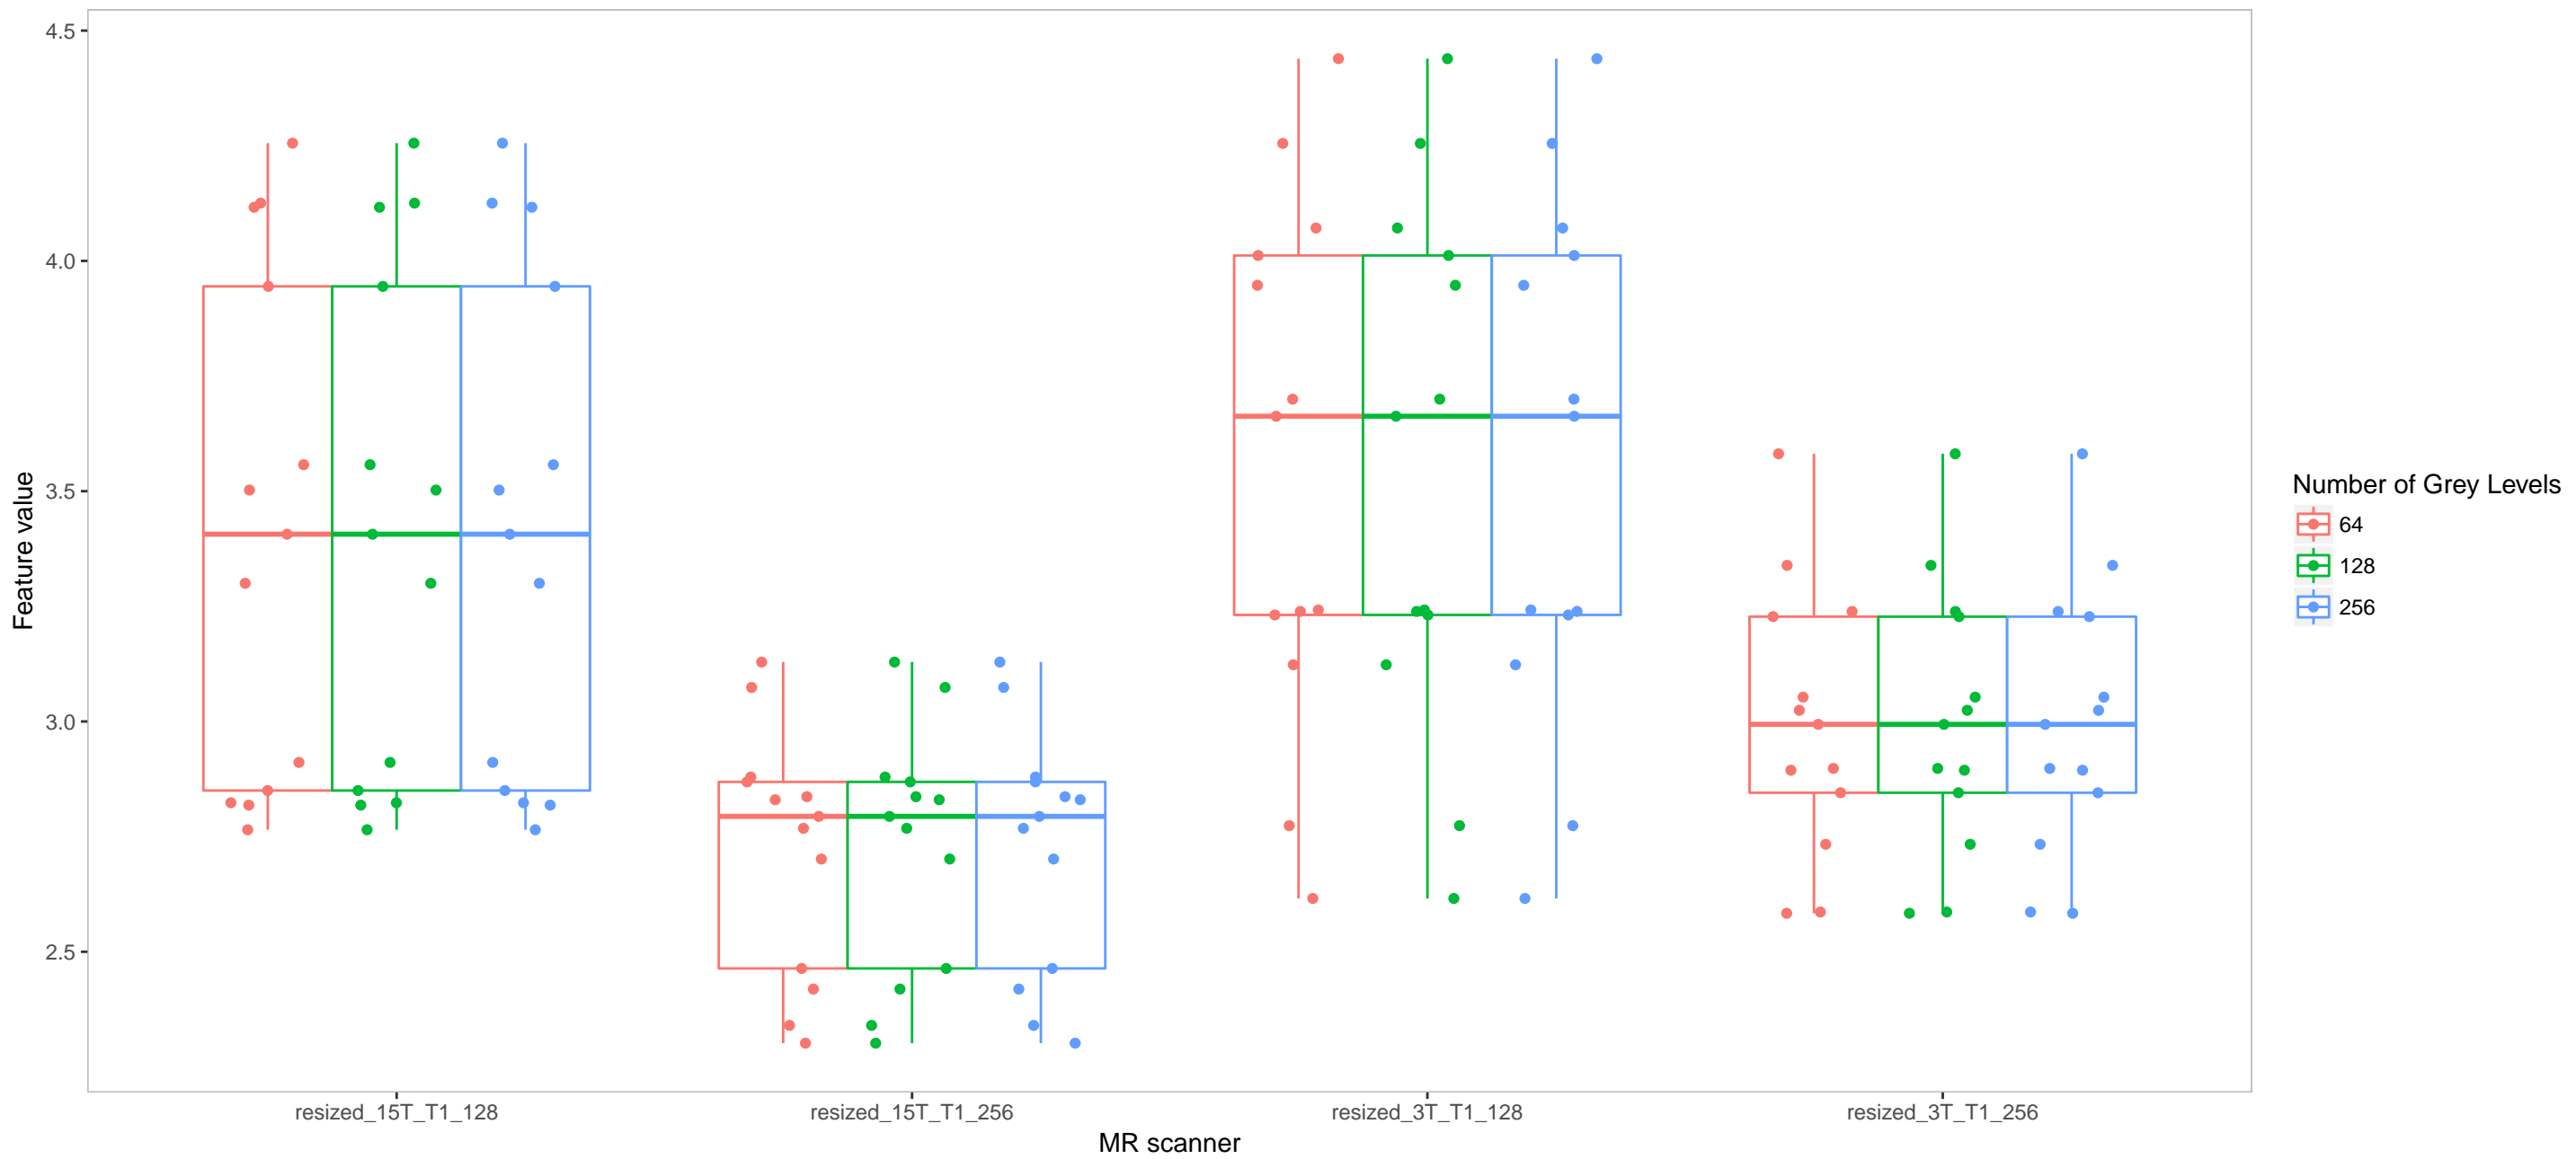

# EntropyH

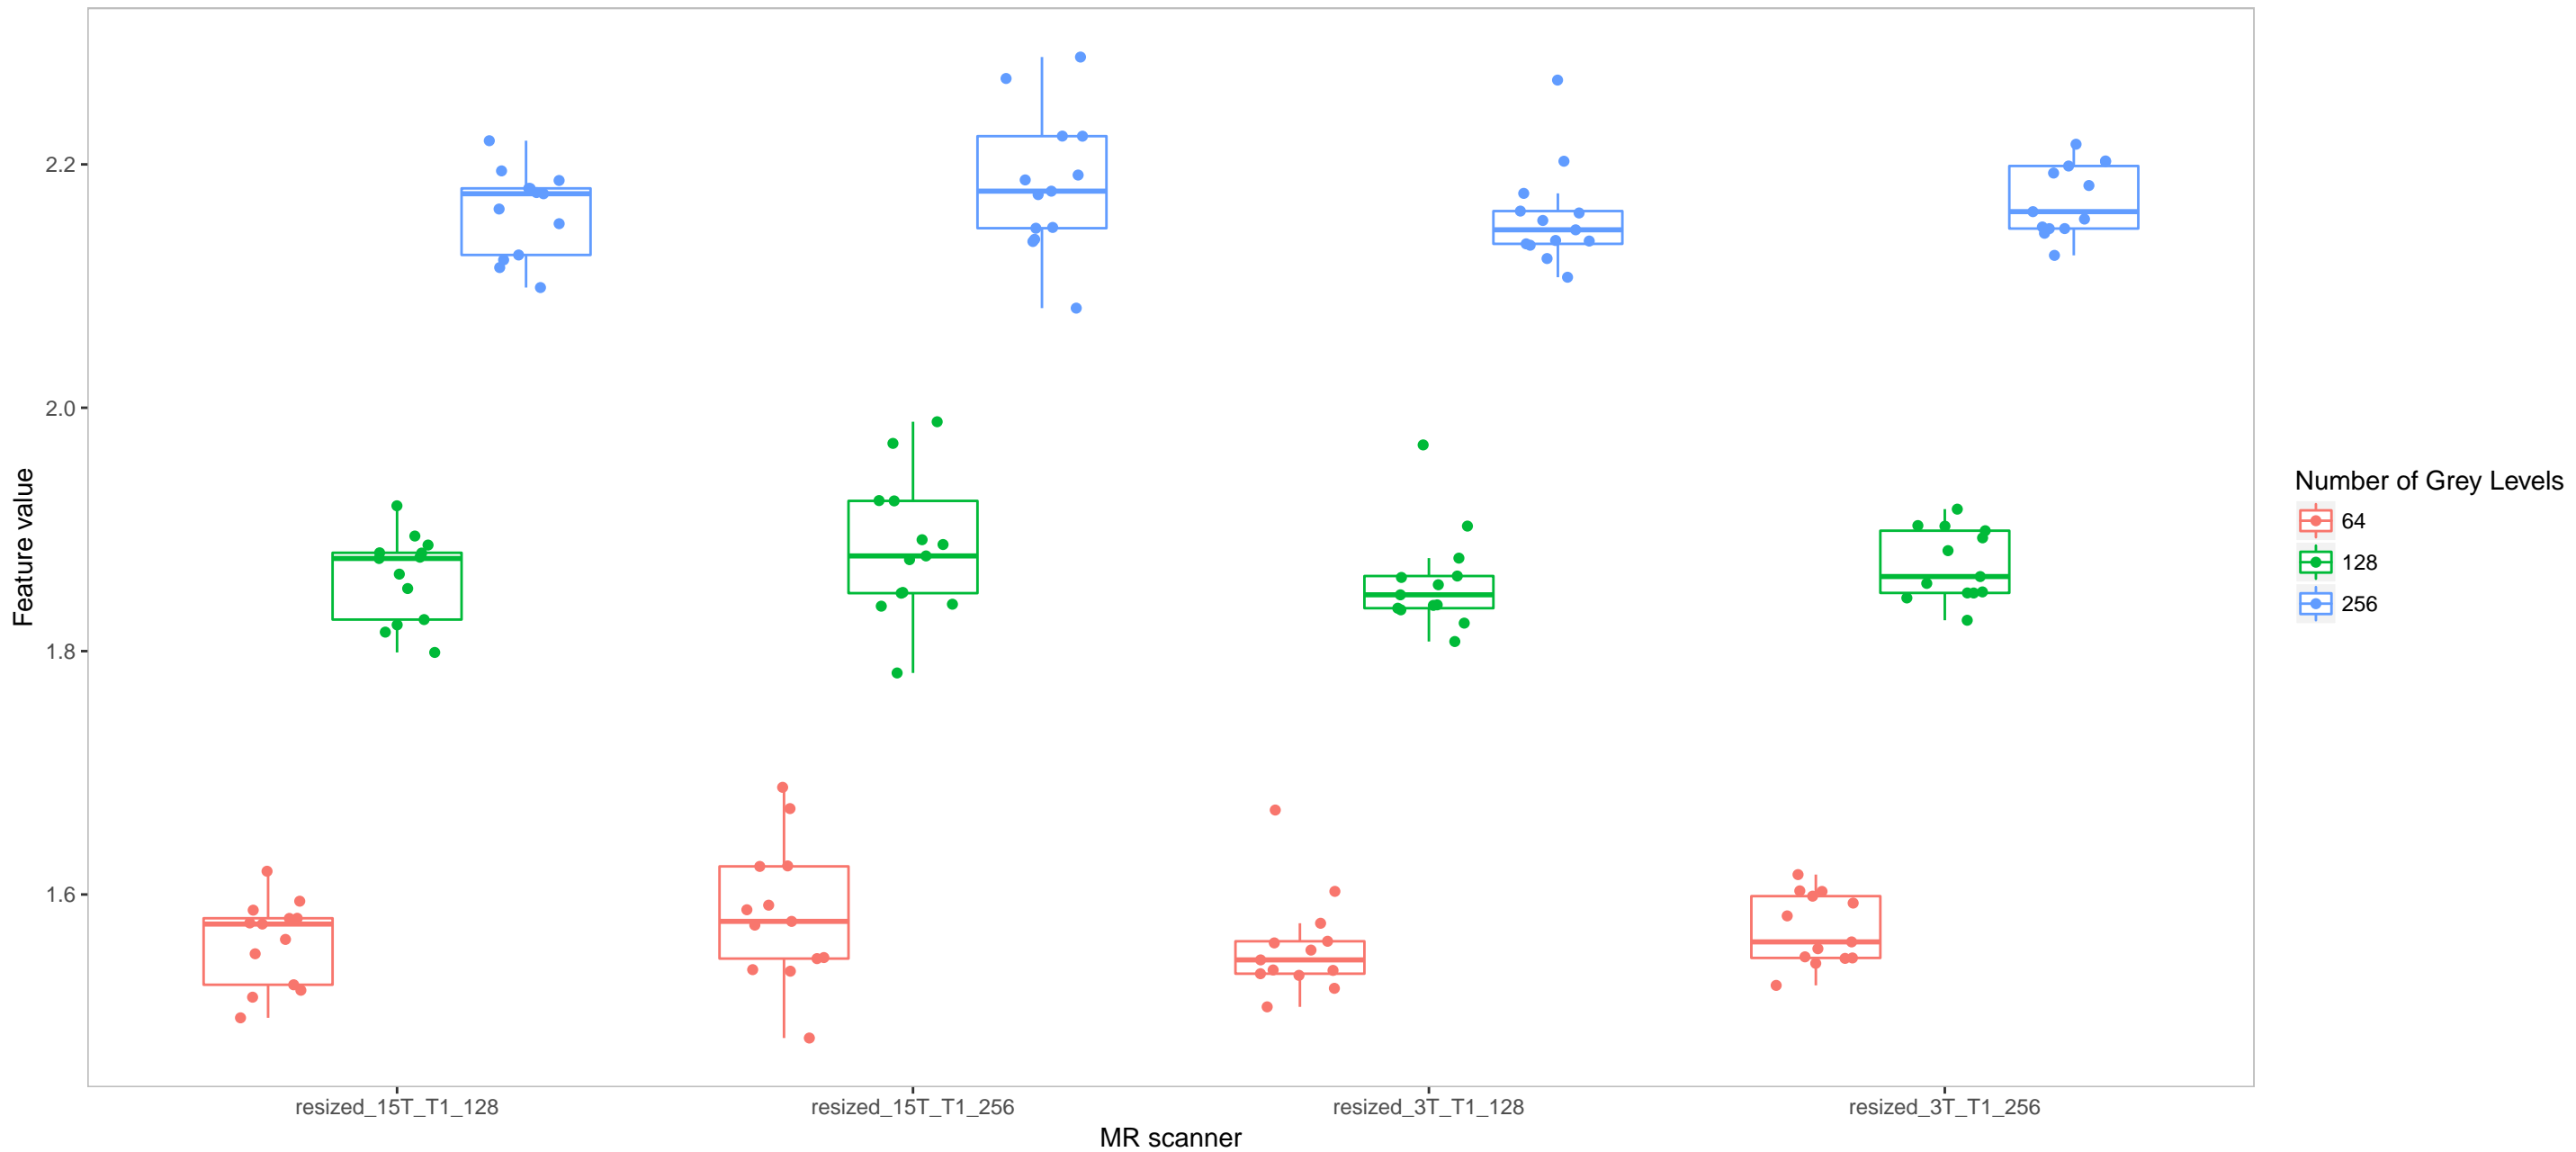

# EnergyH

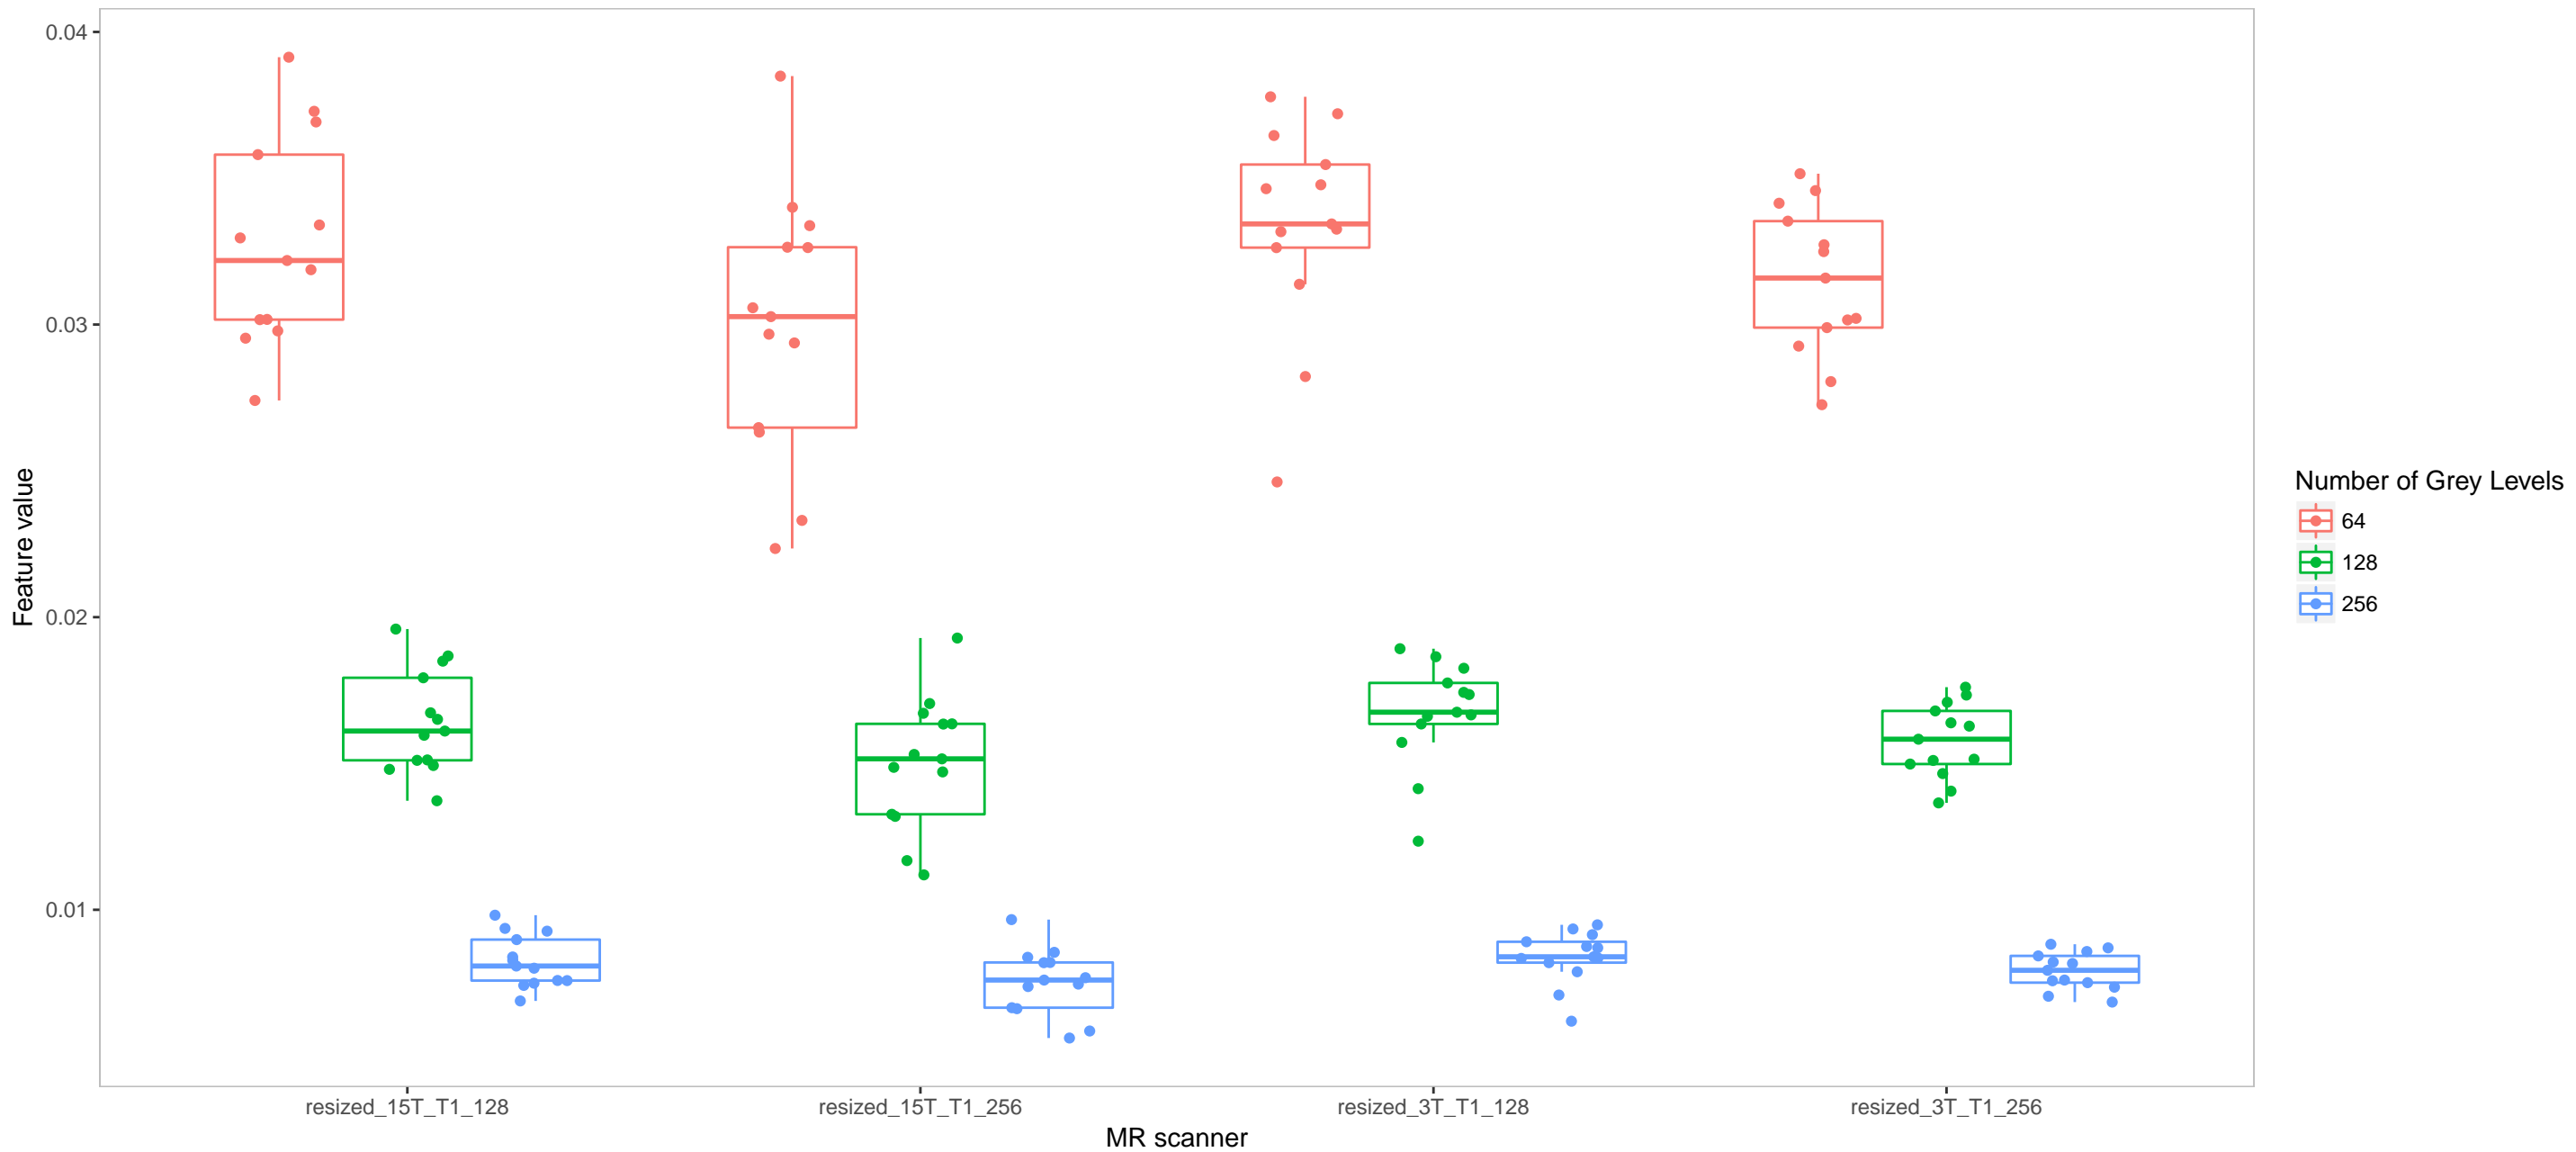



# Homogeneity

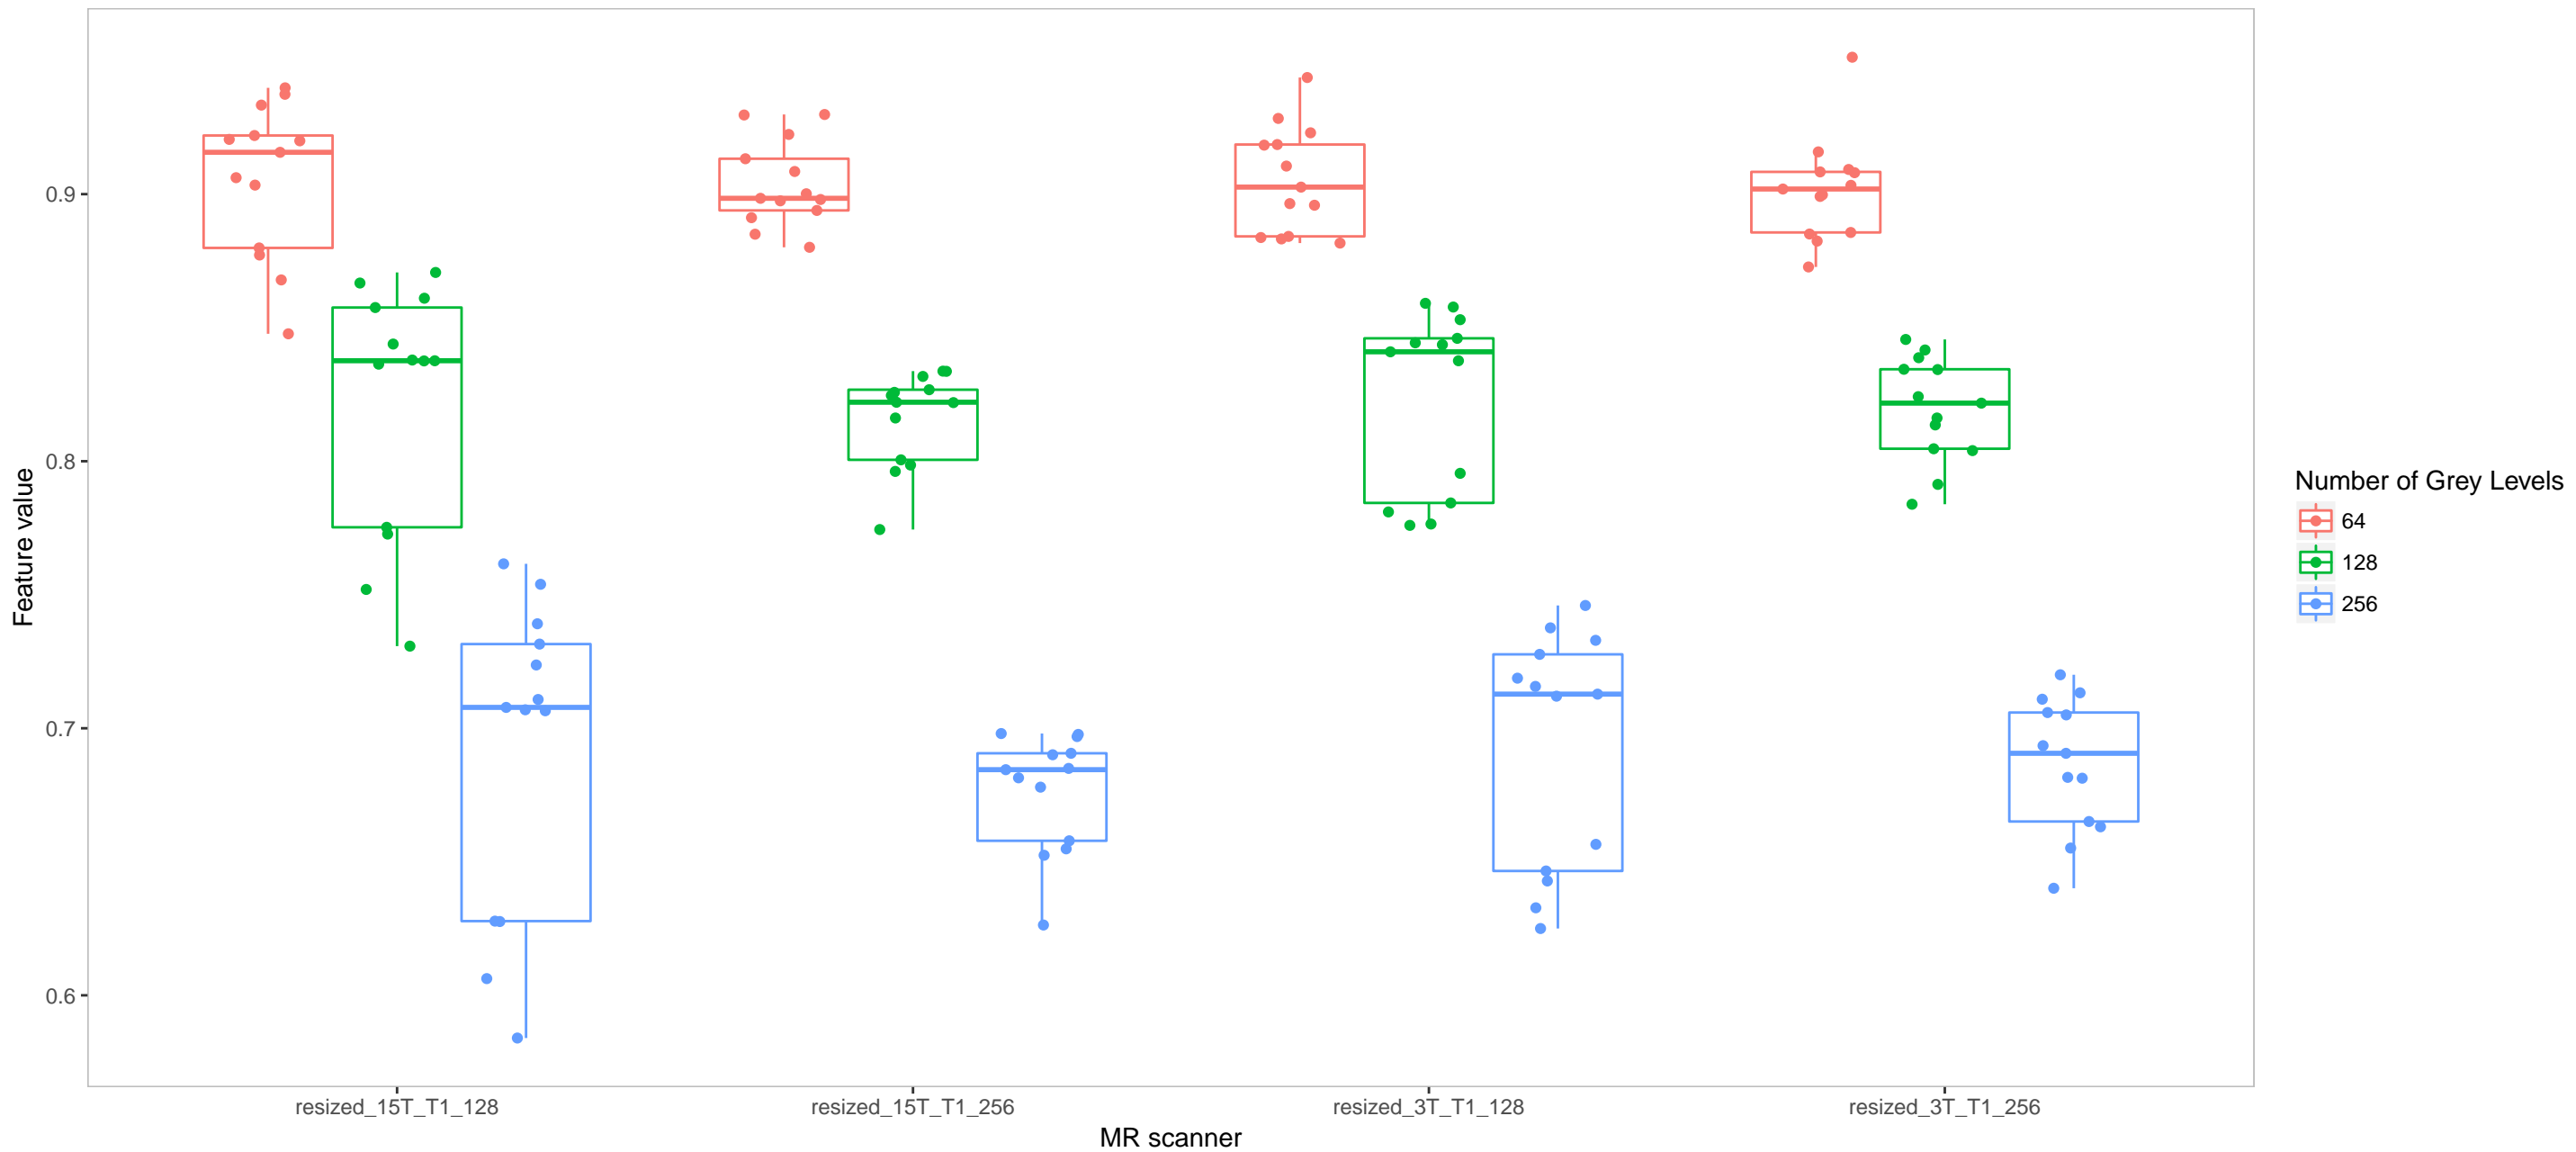

# Energy

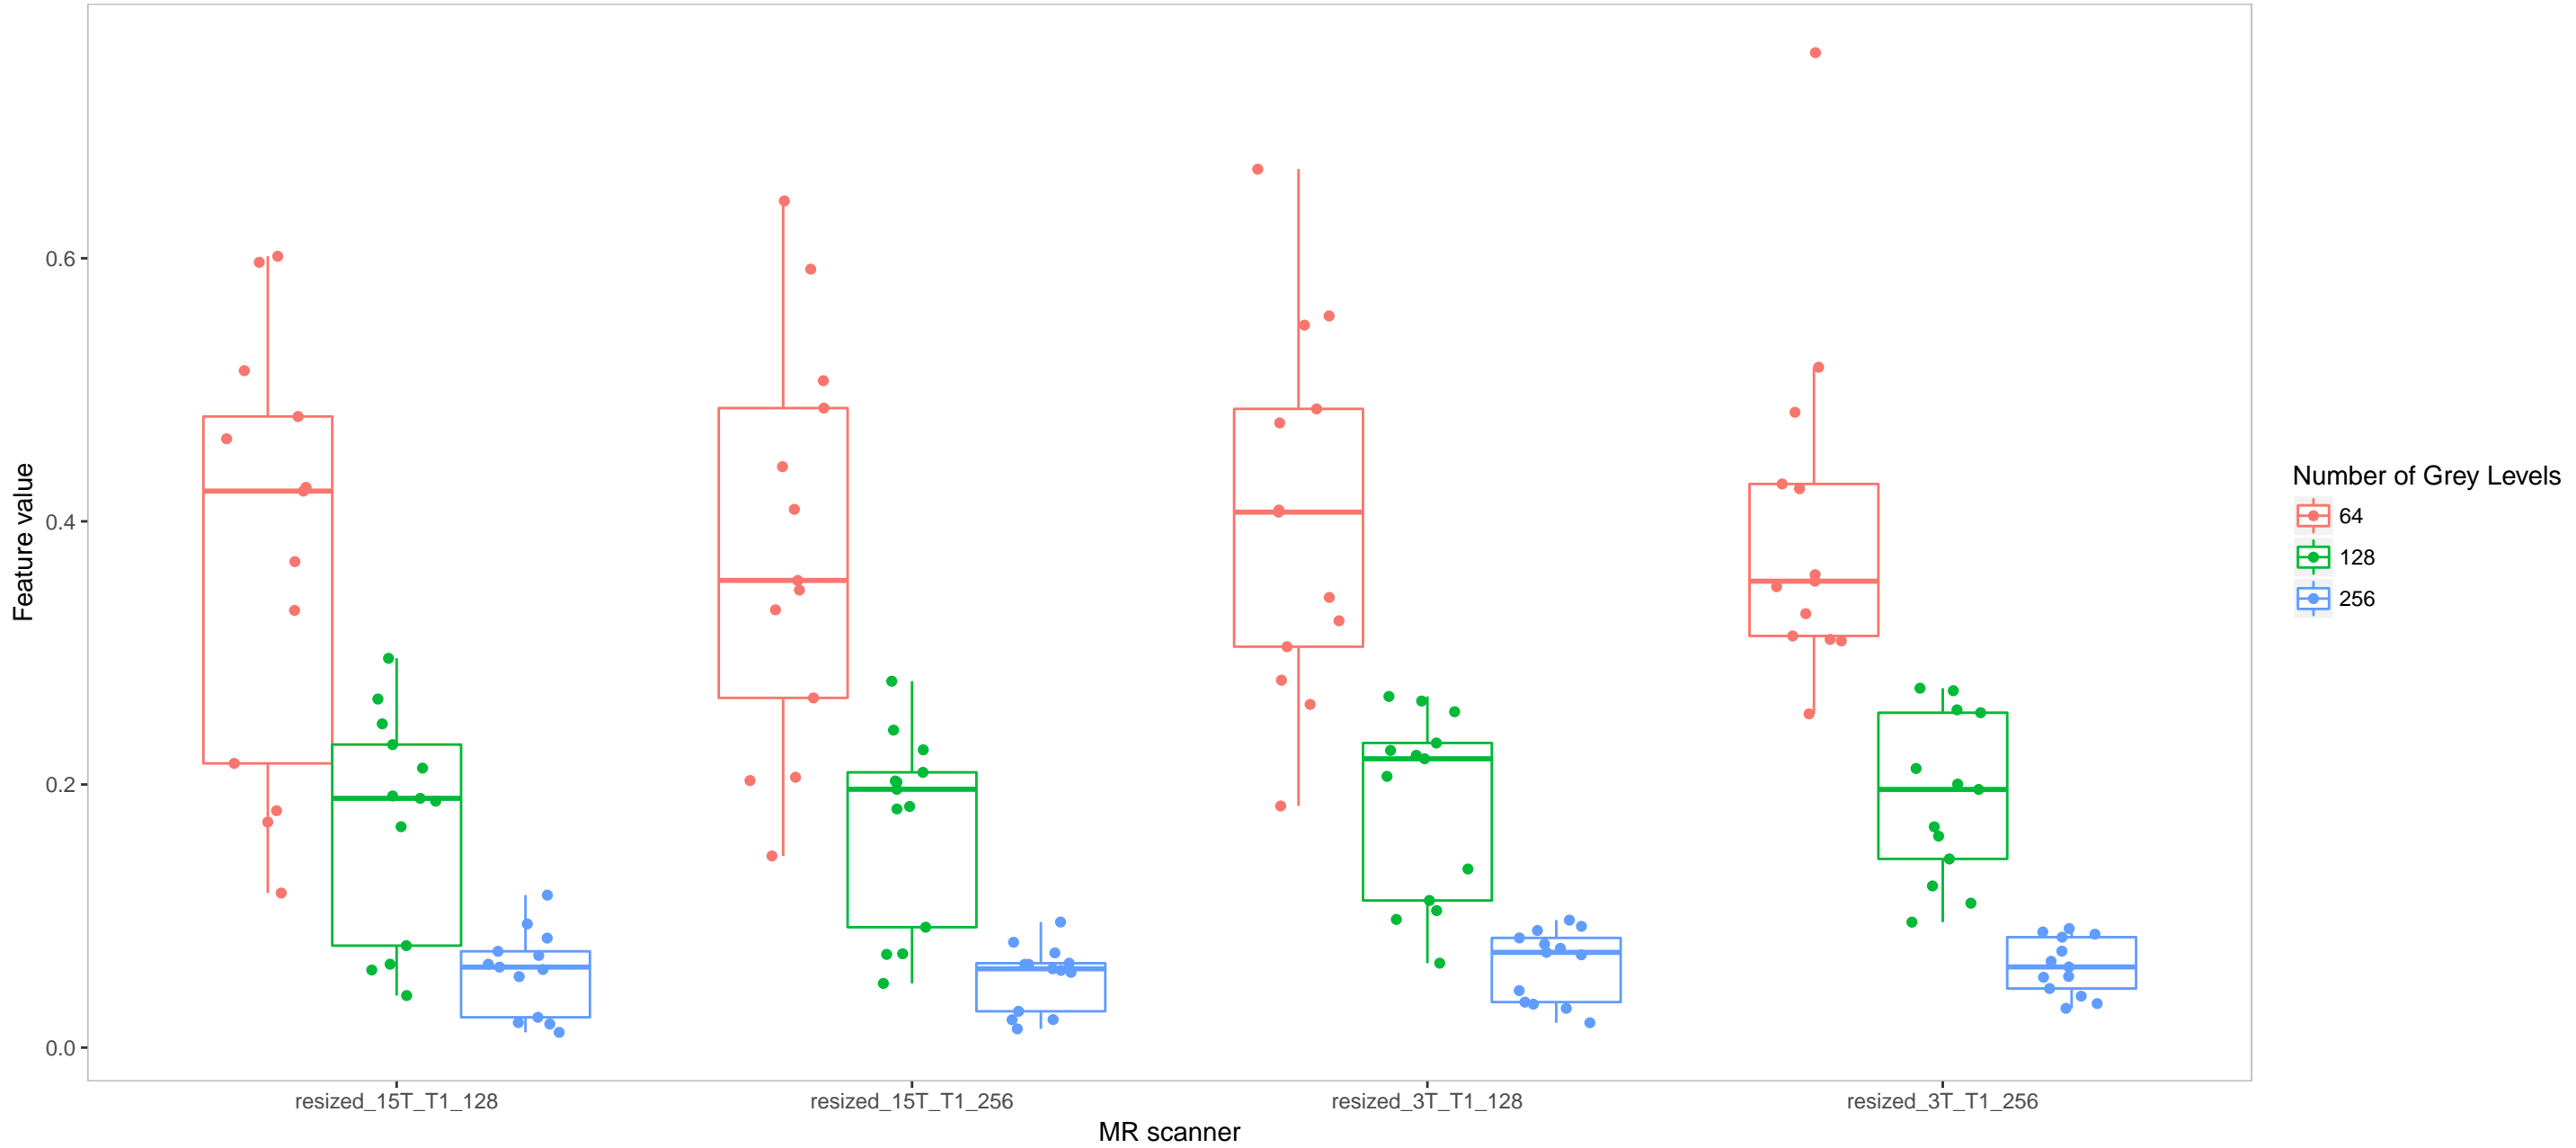

Contrast

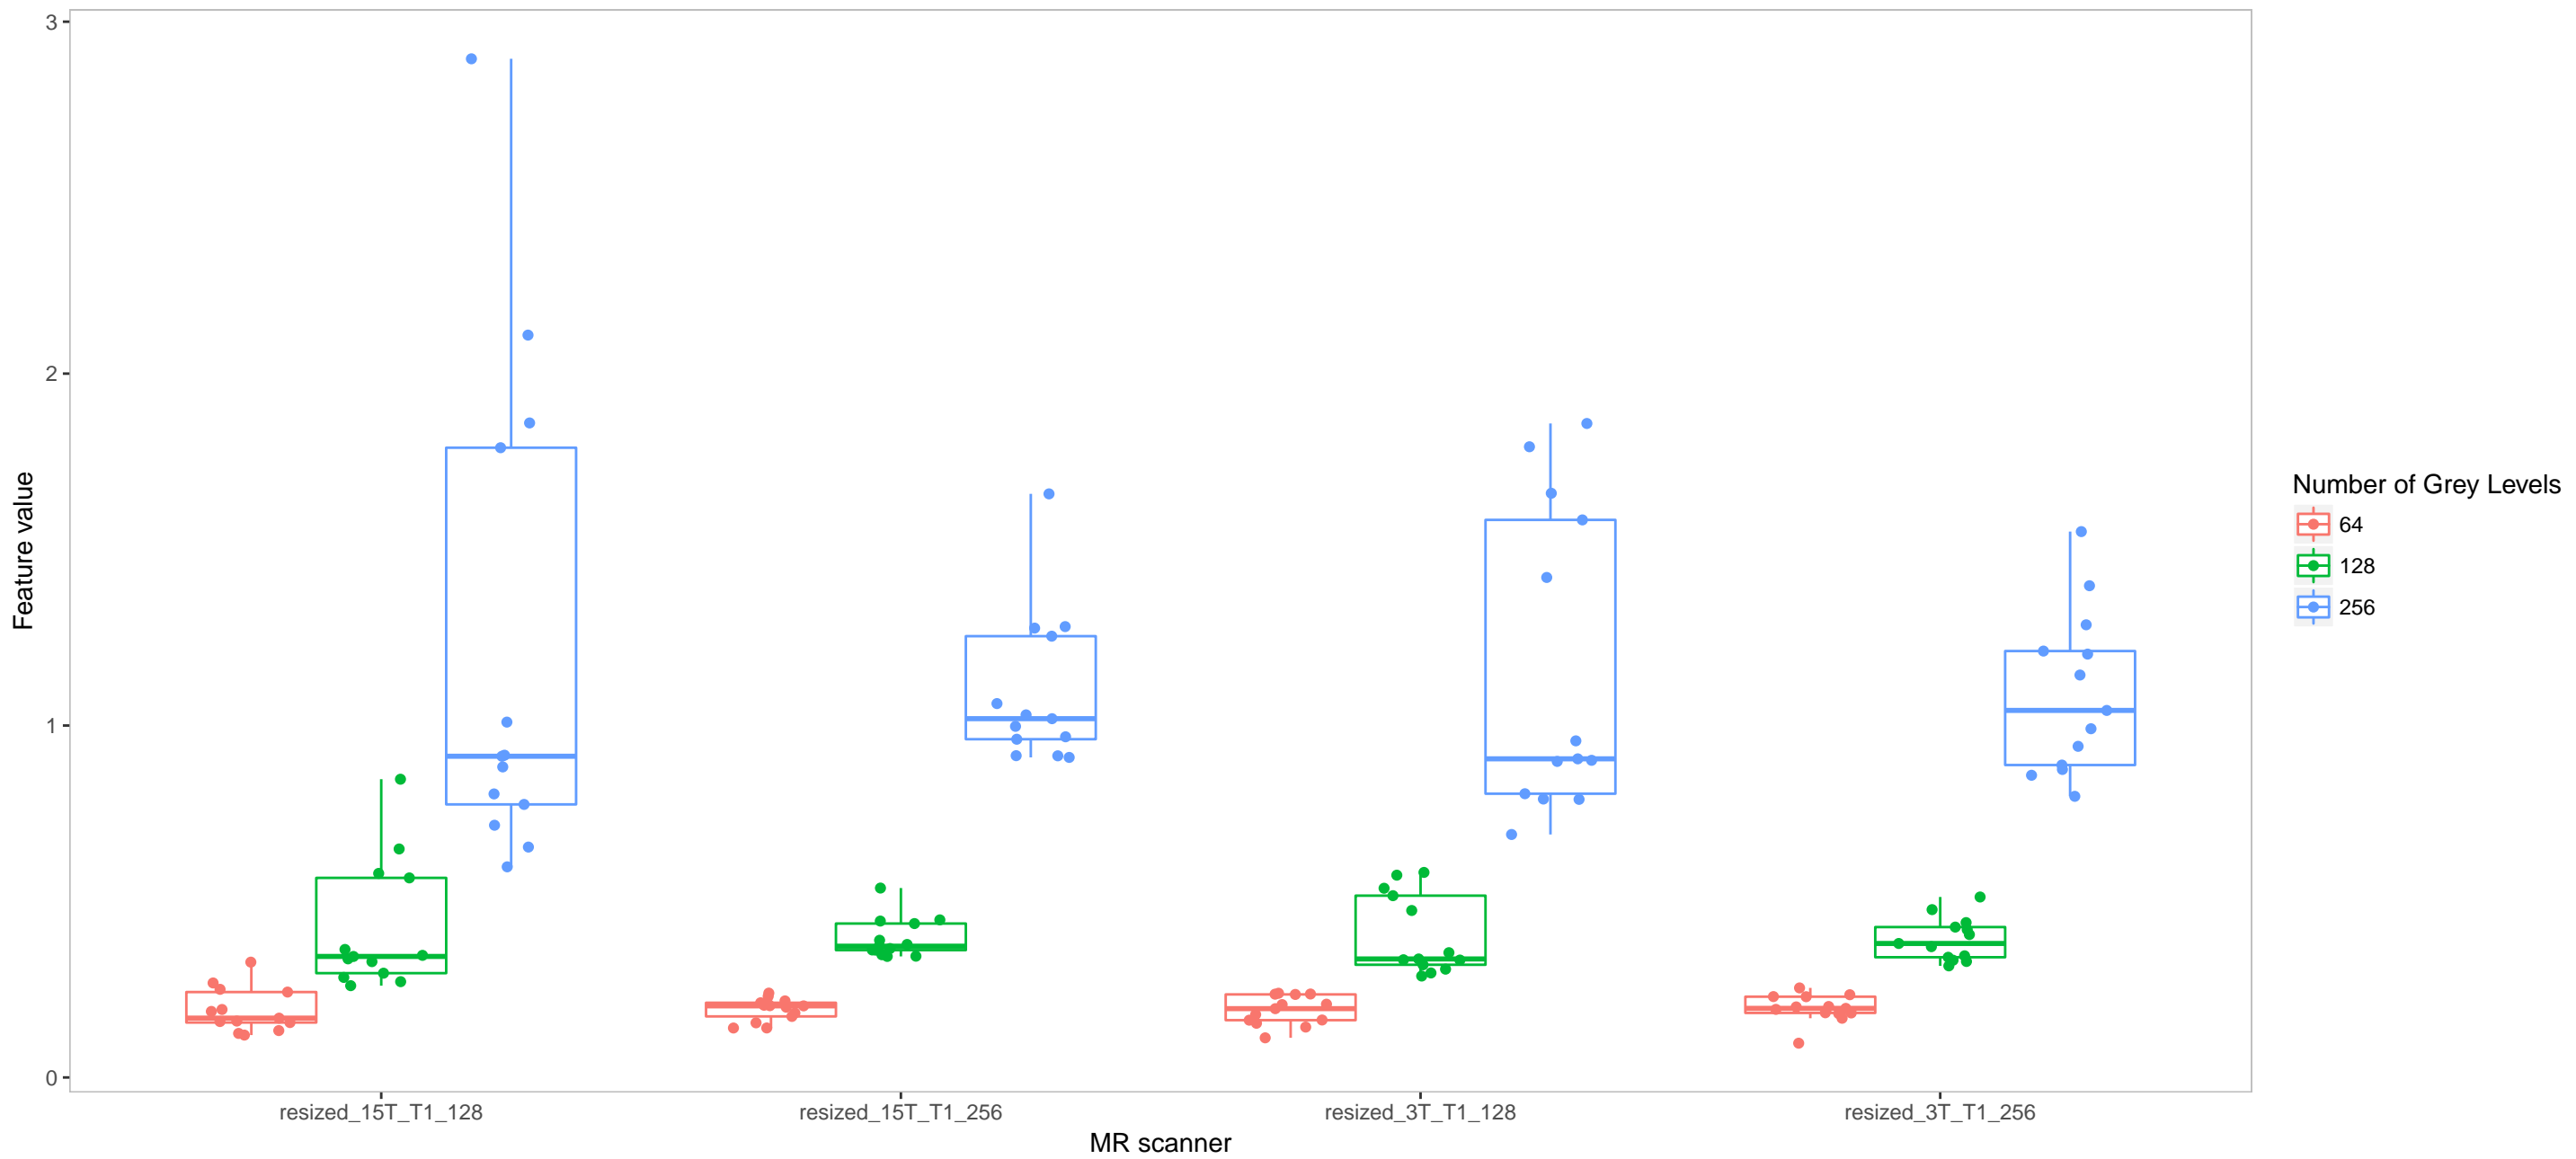

# Correlation

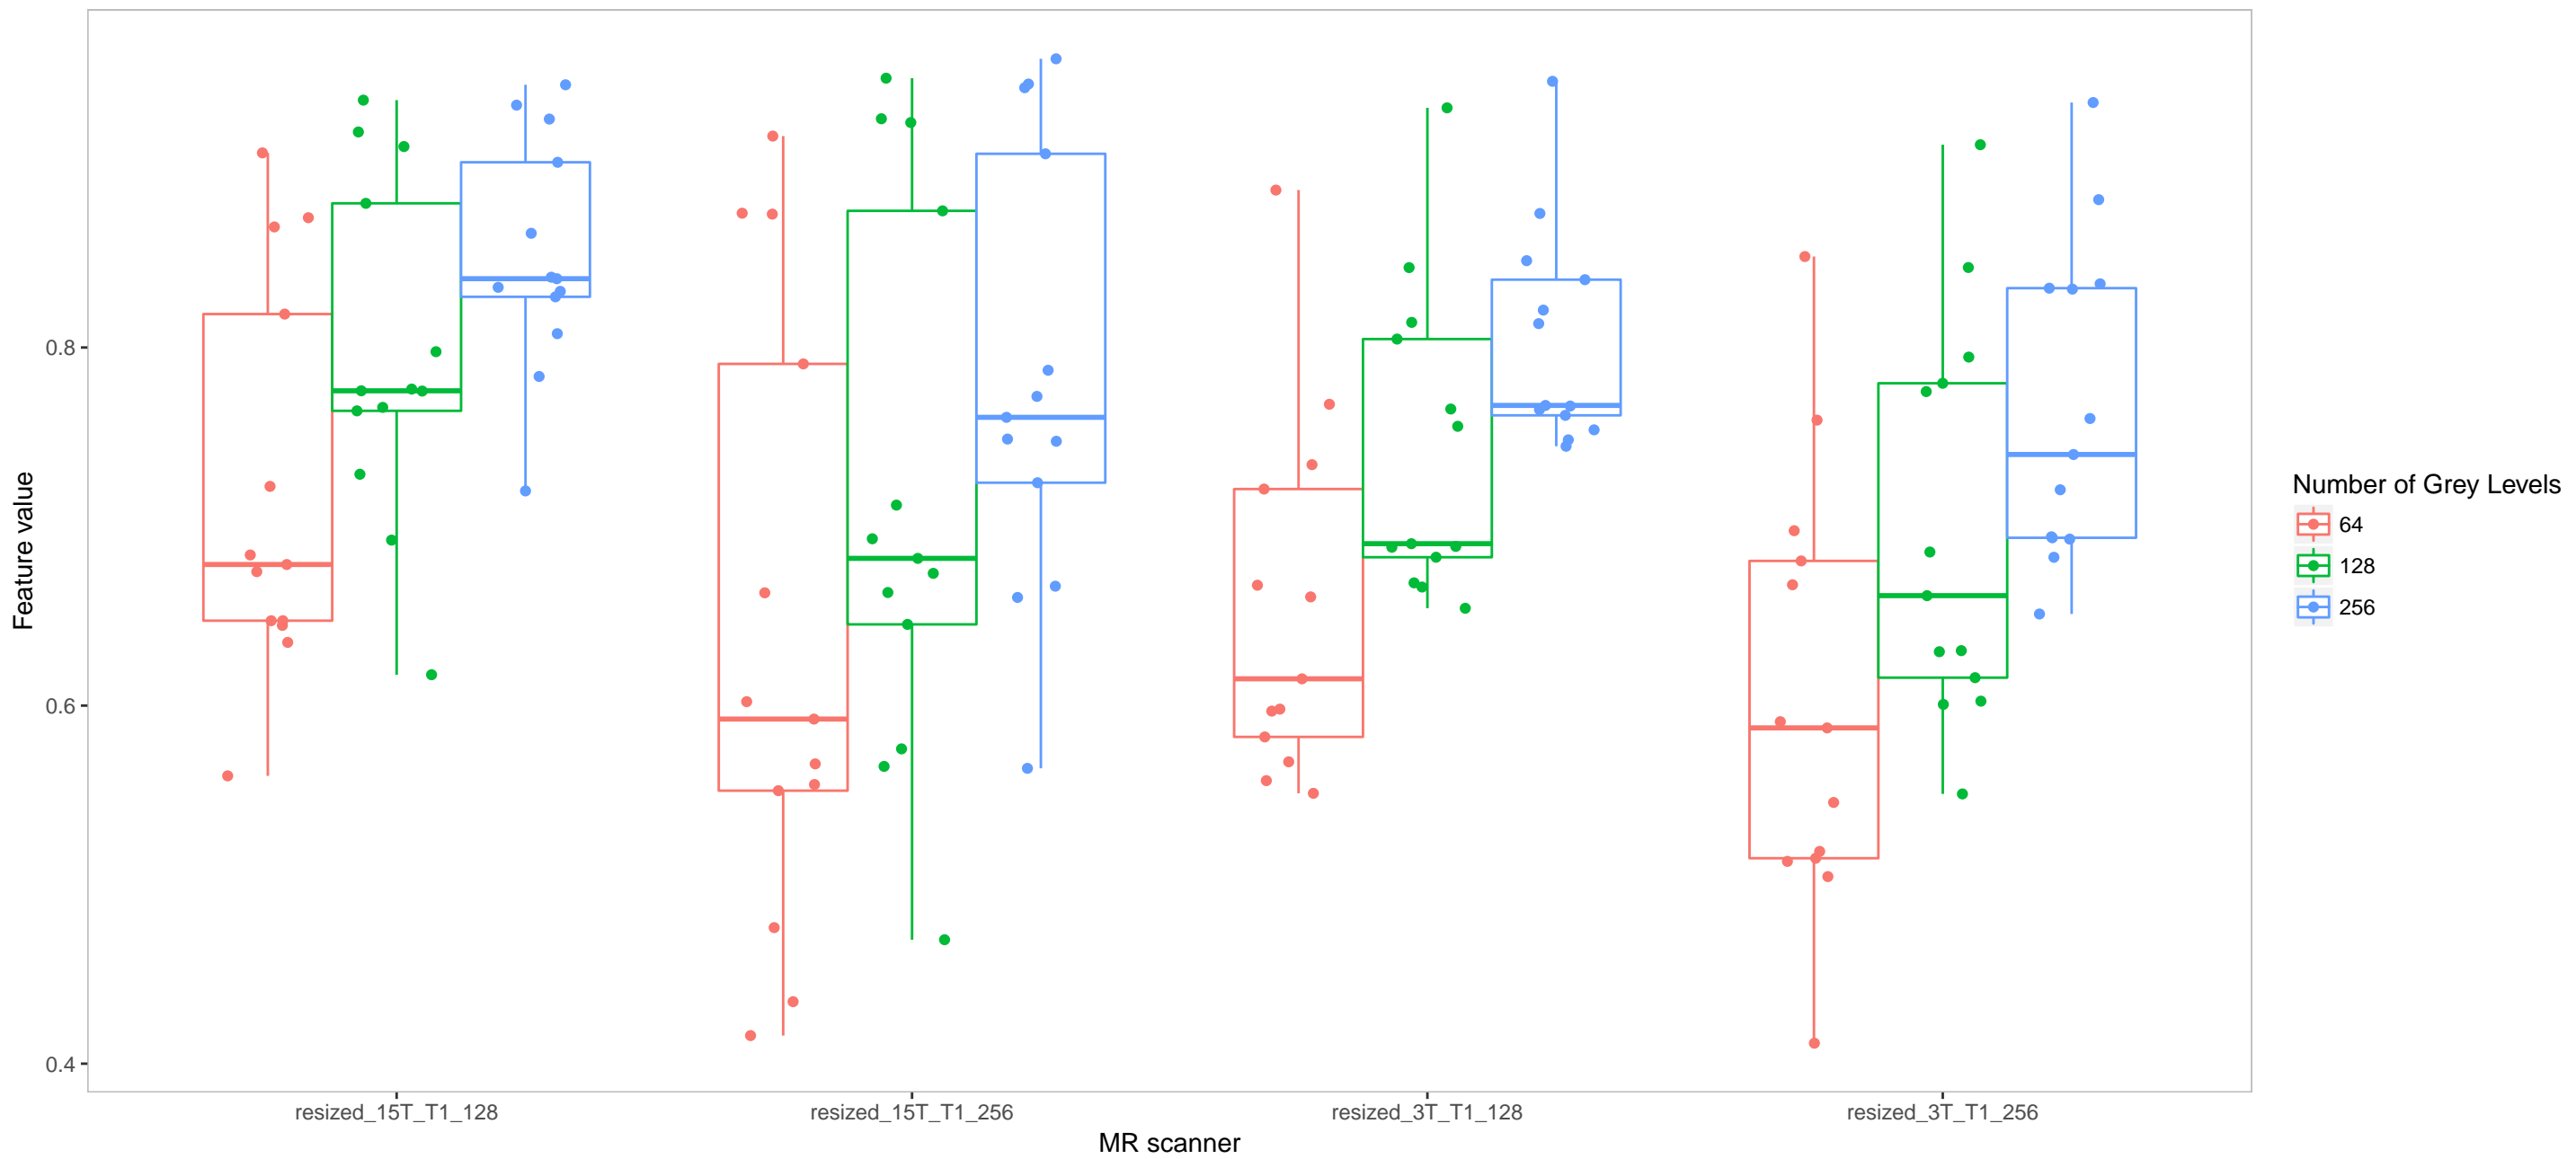

# Entropy

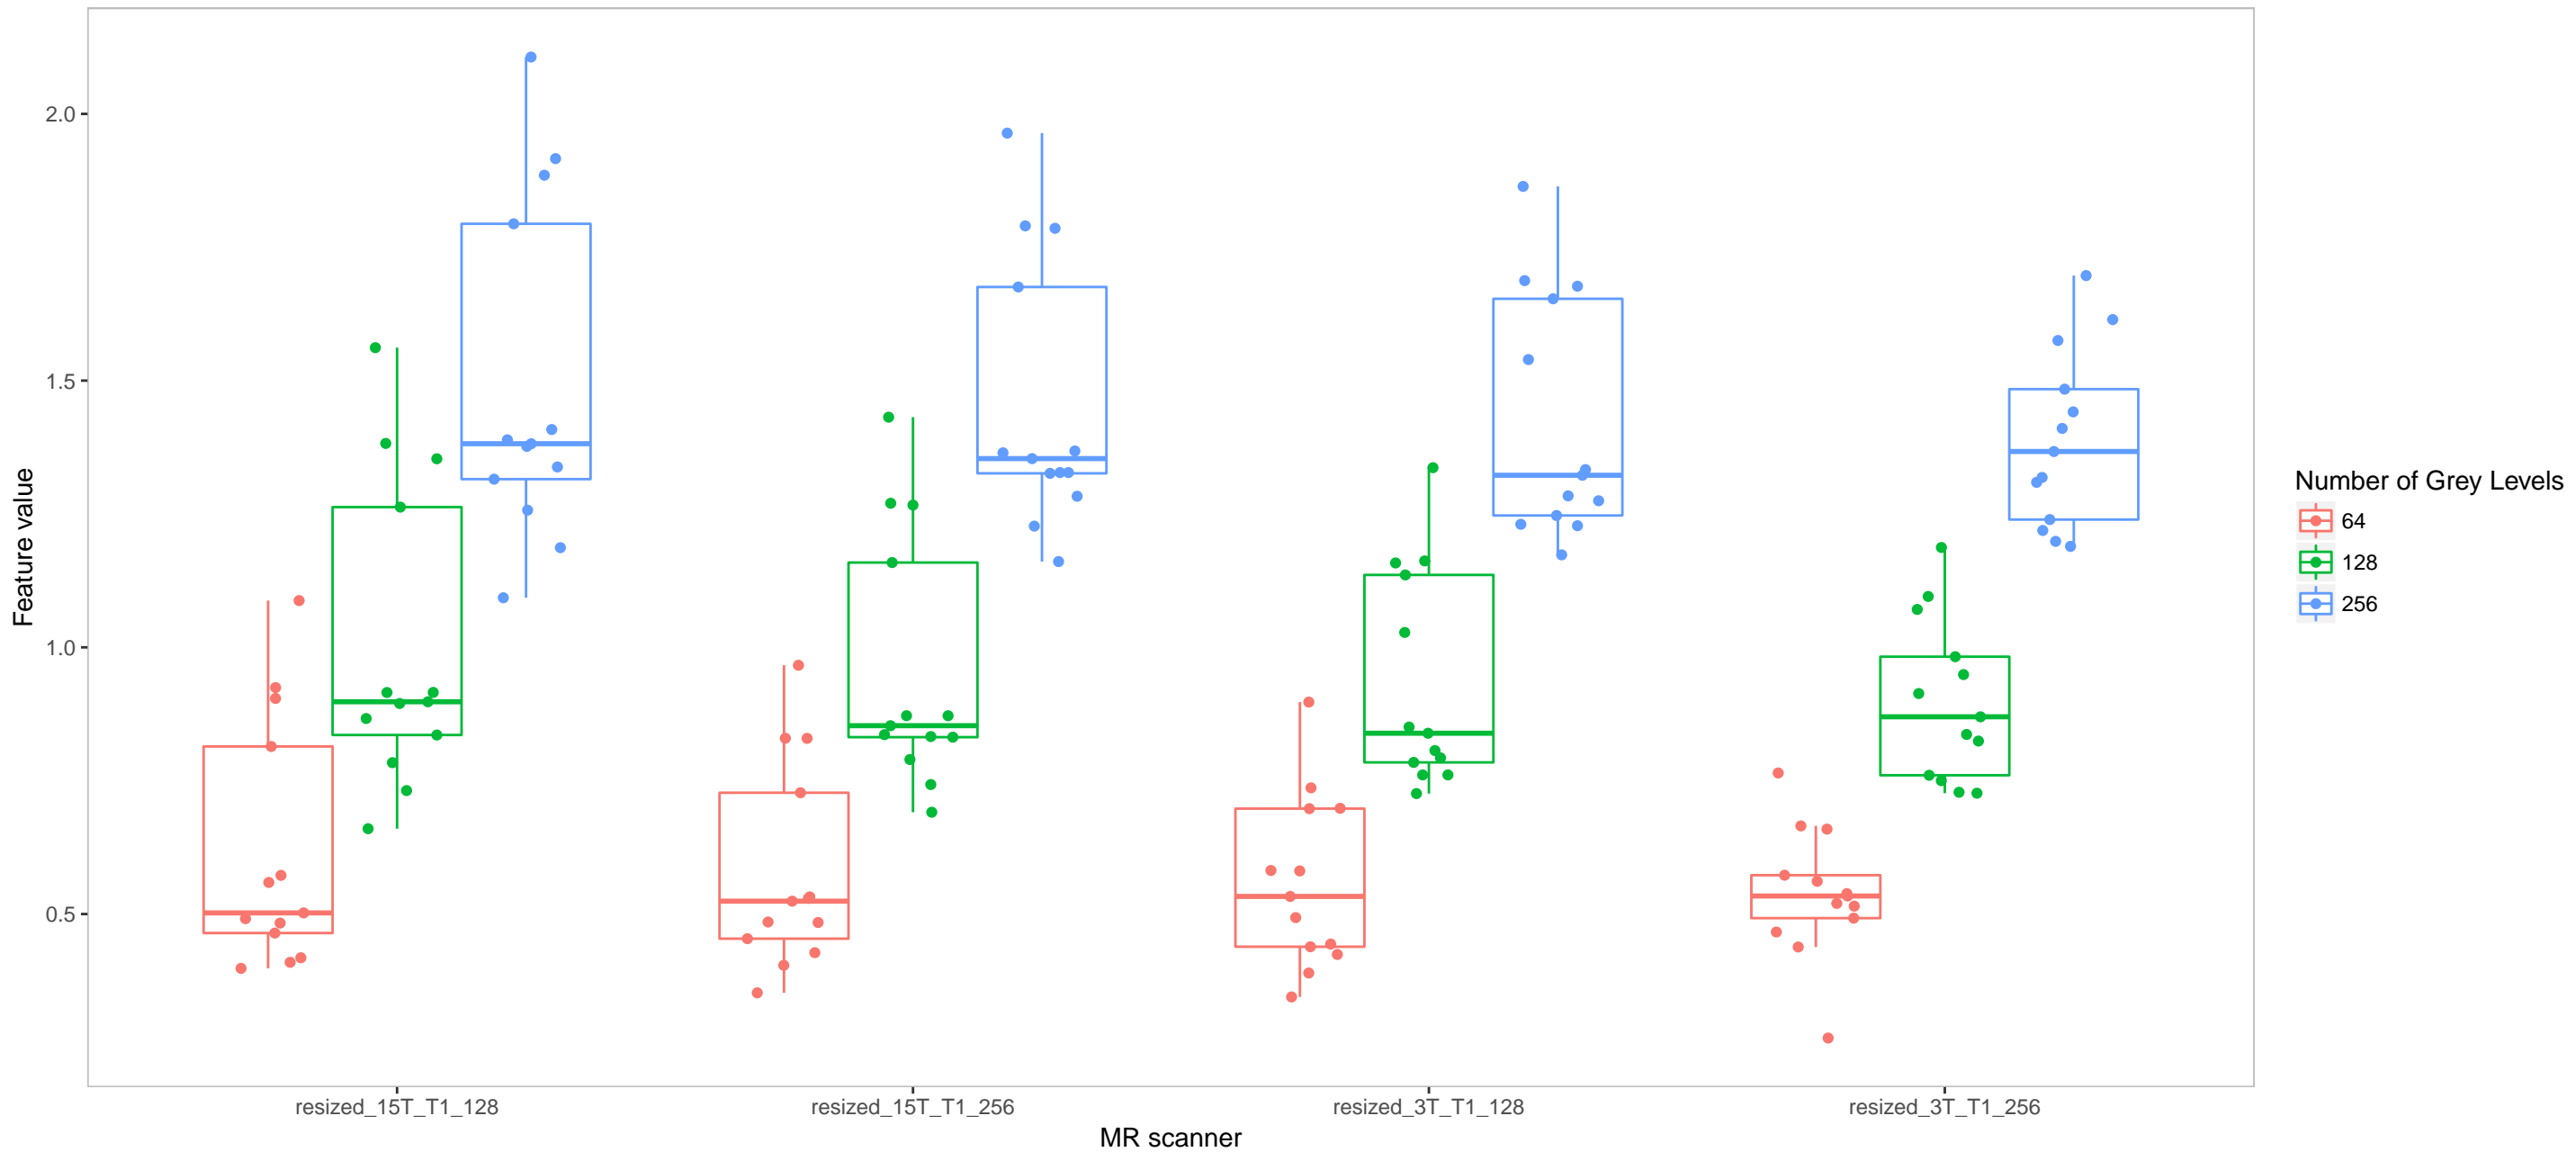

Dissimilarity

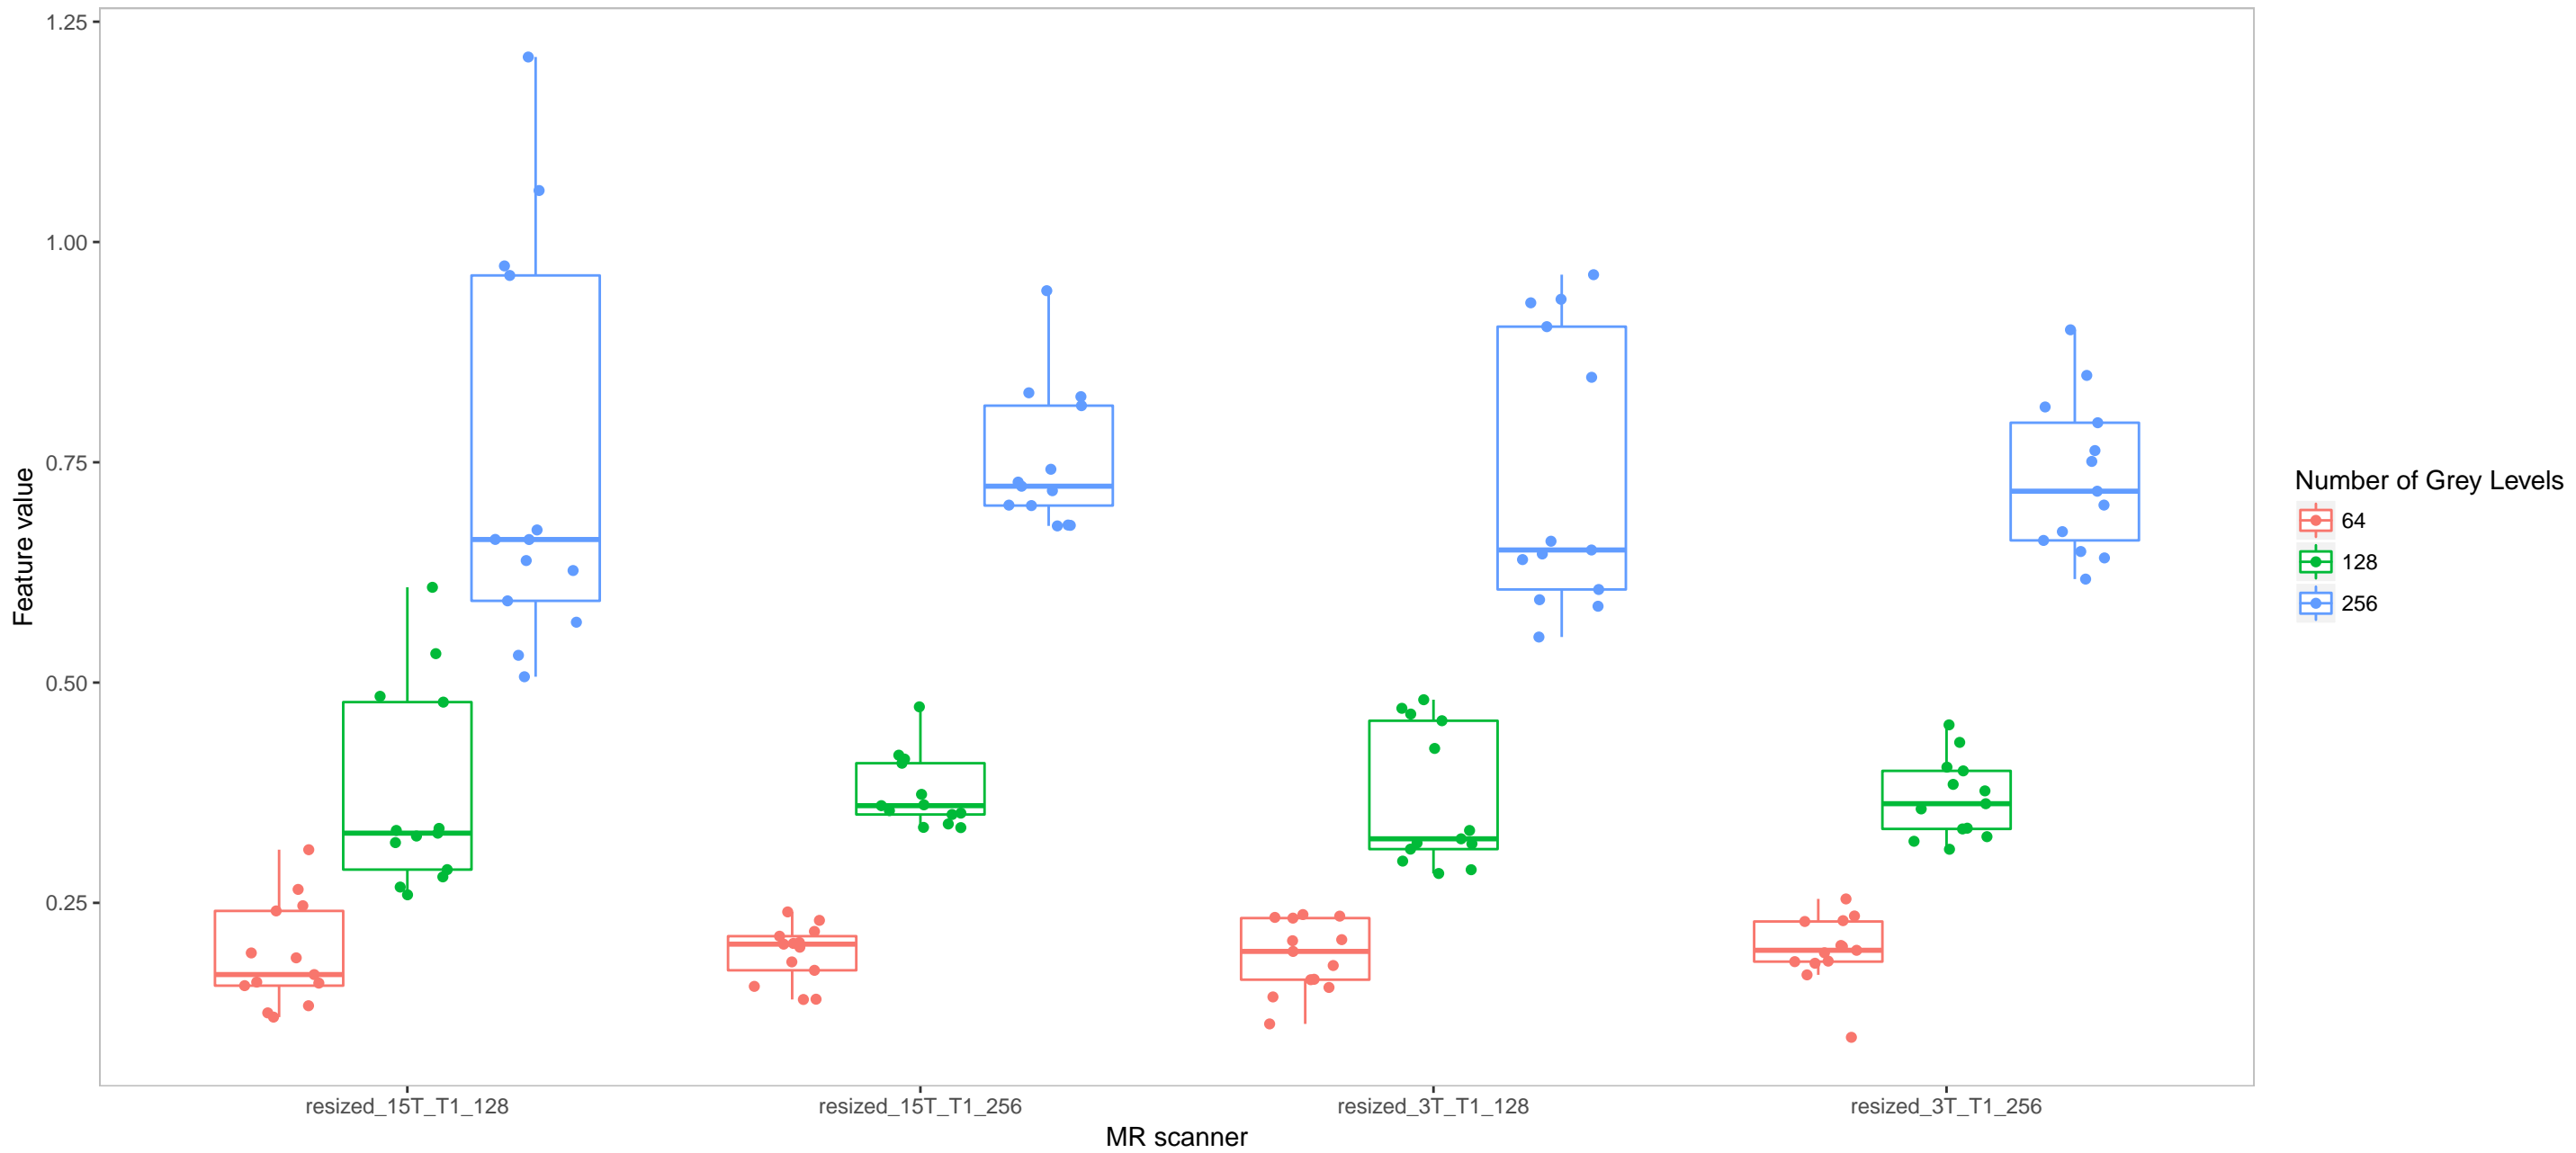

SRE

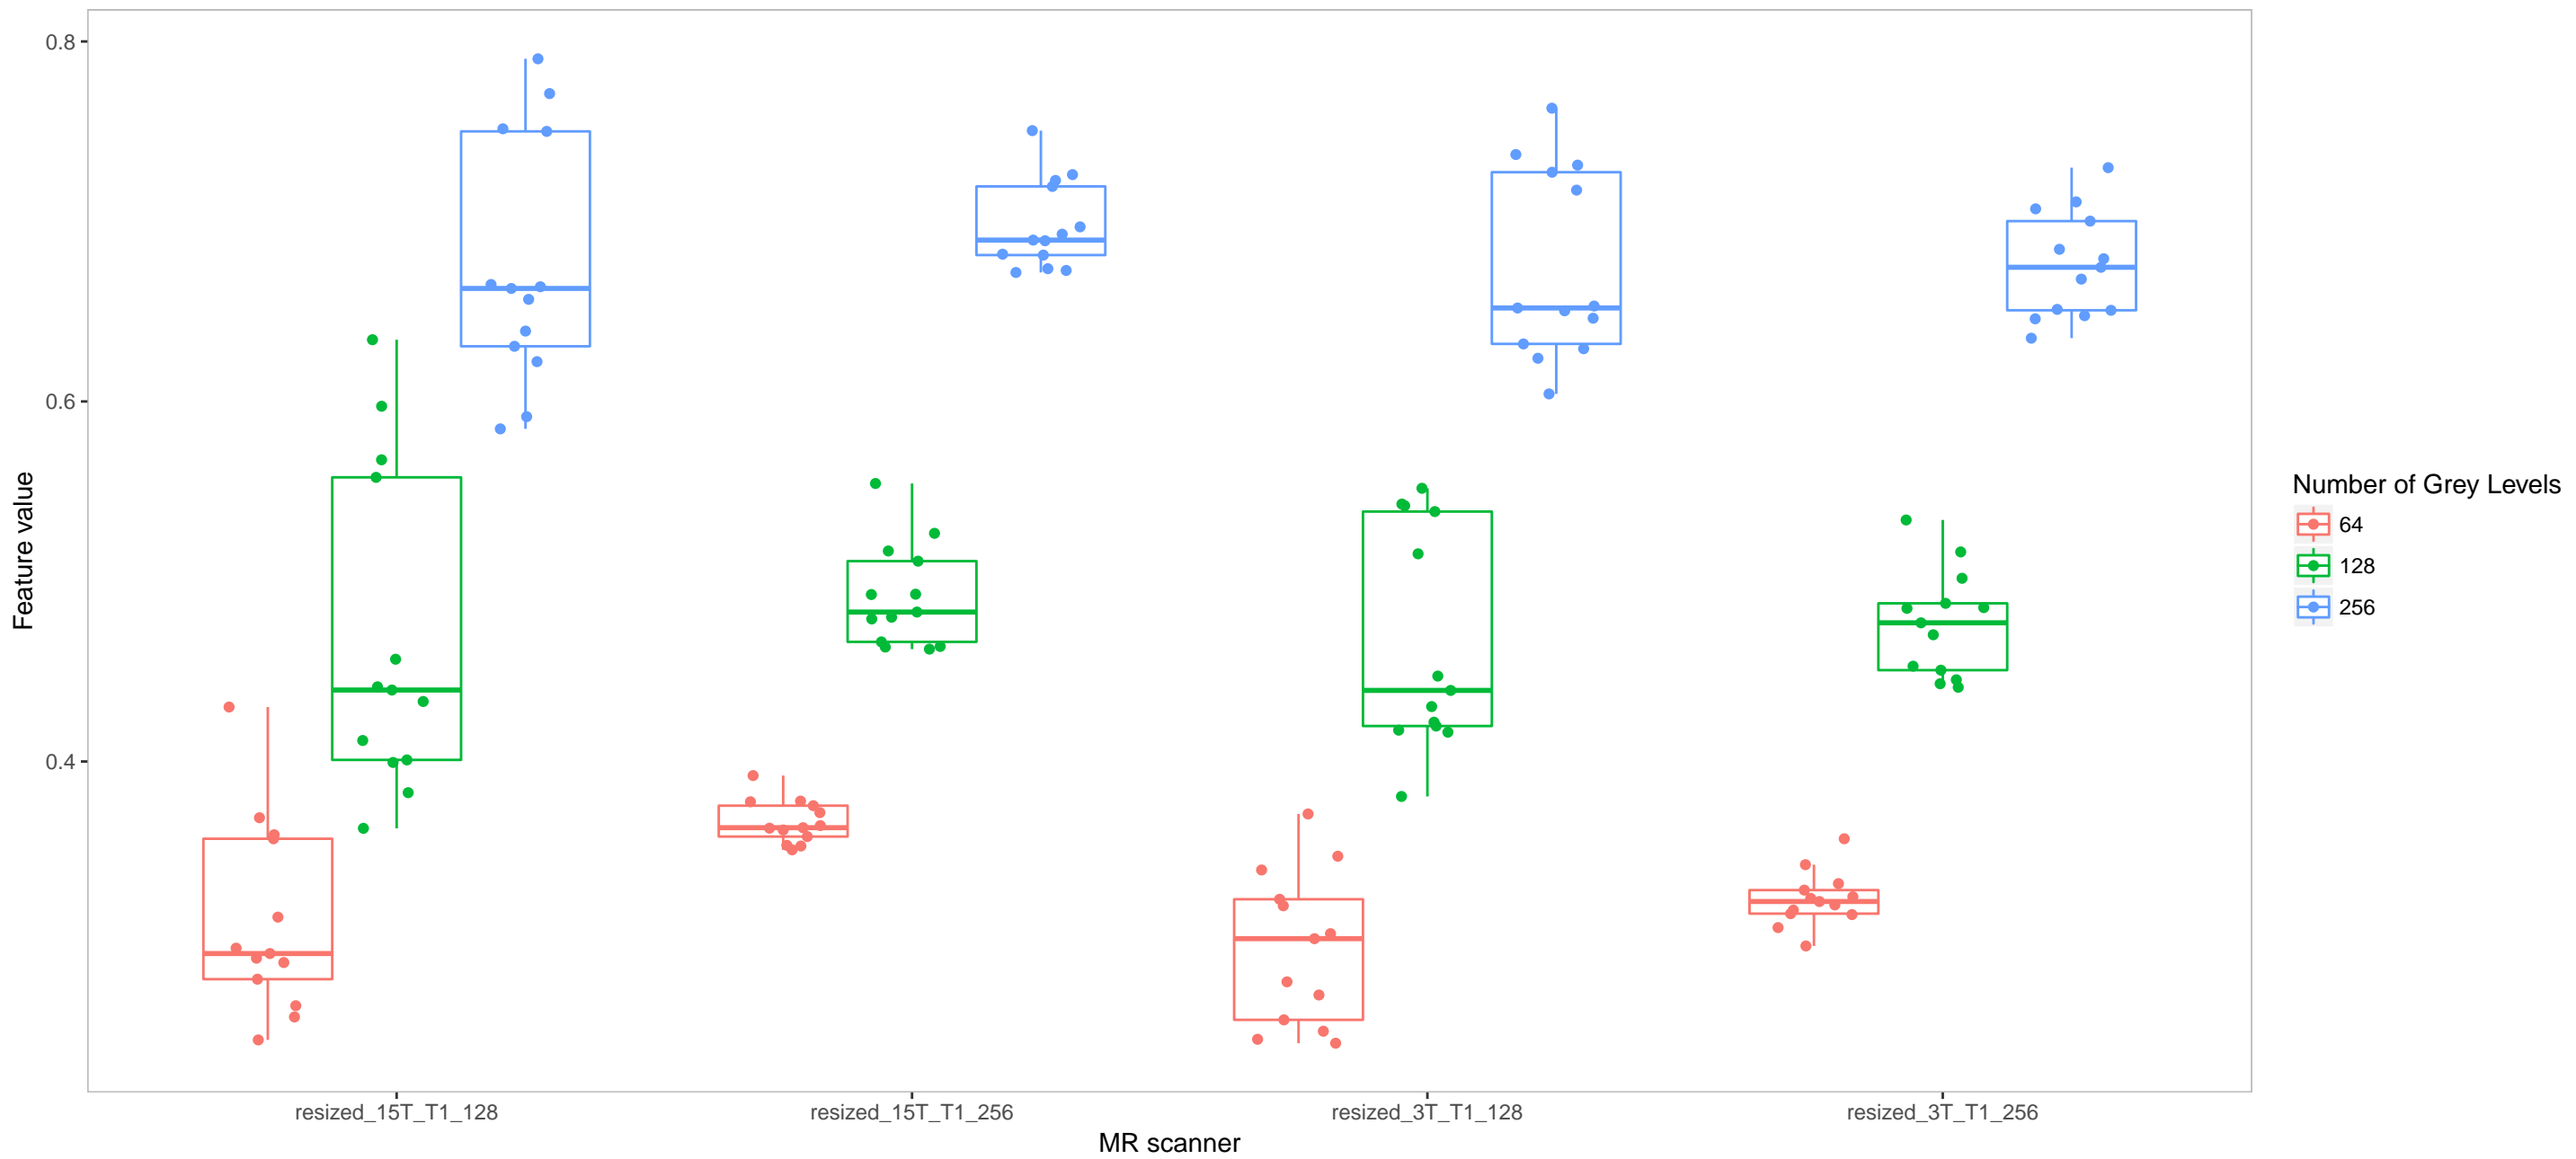

LRE

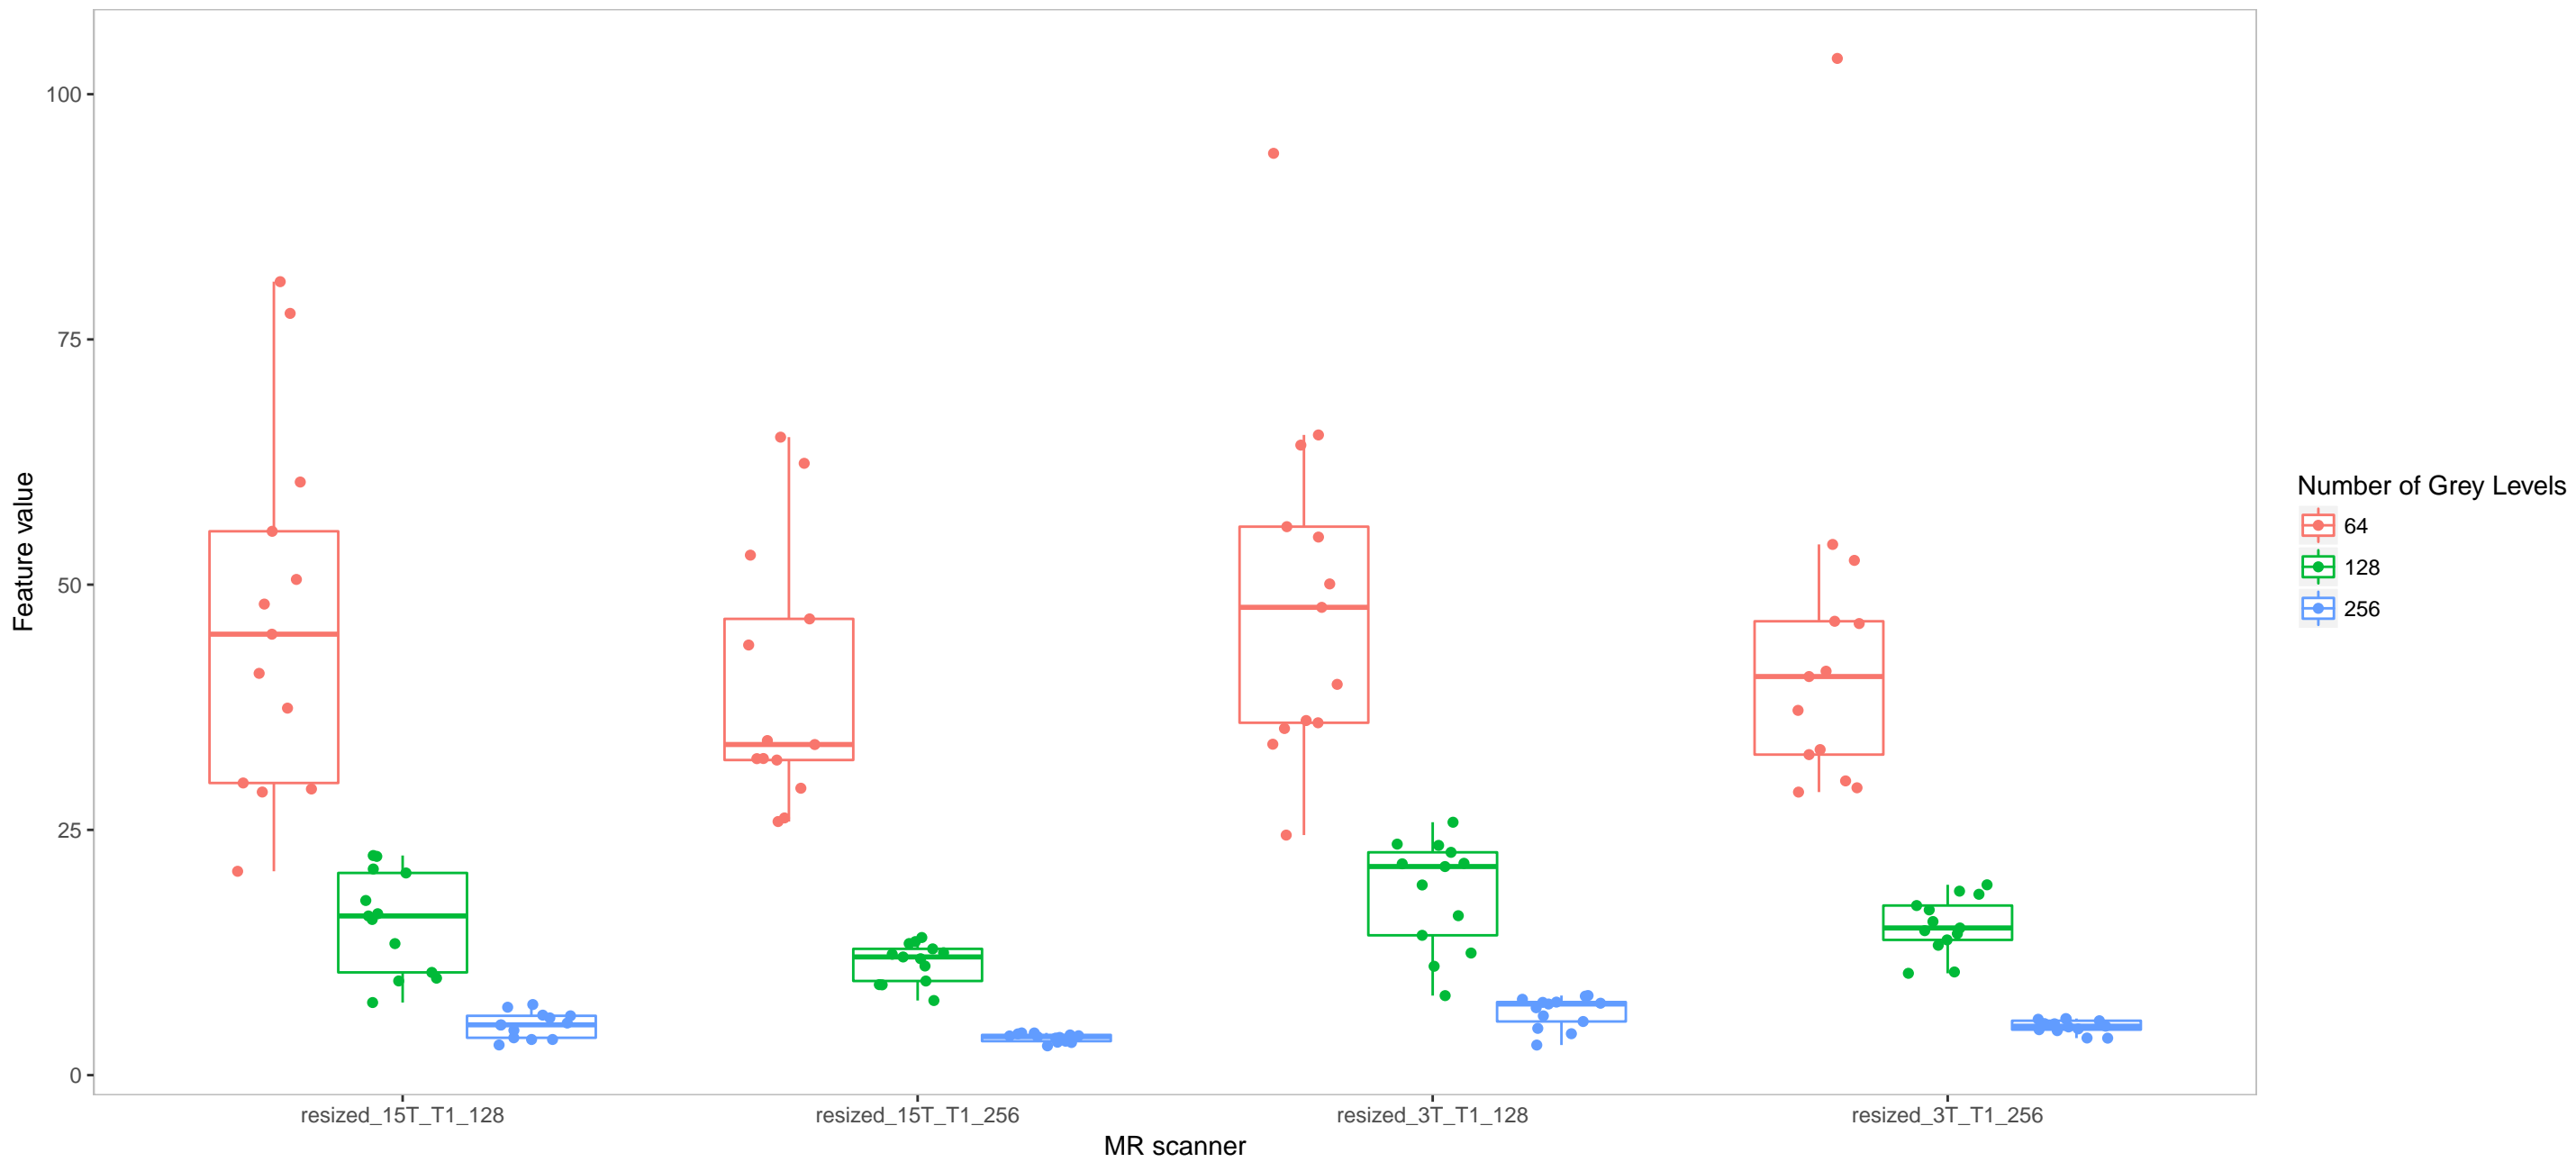



# LGRE

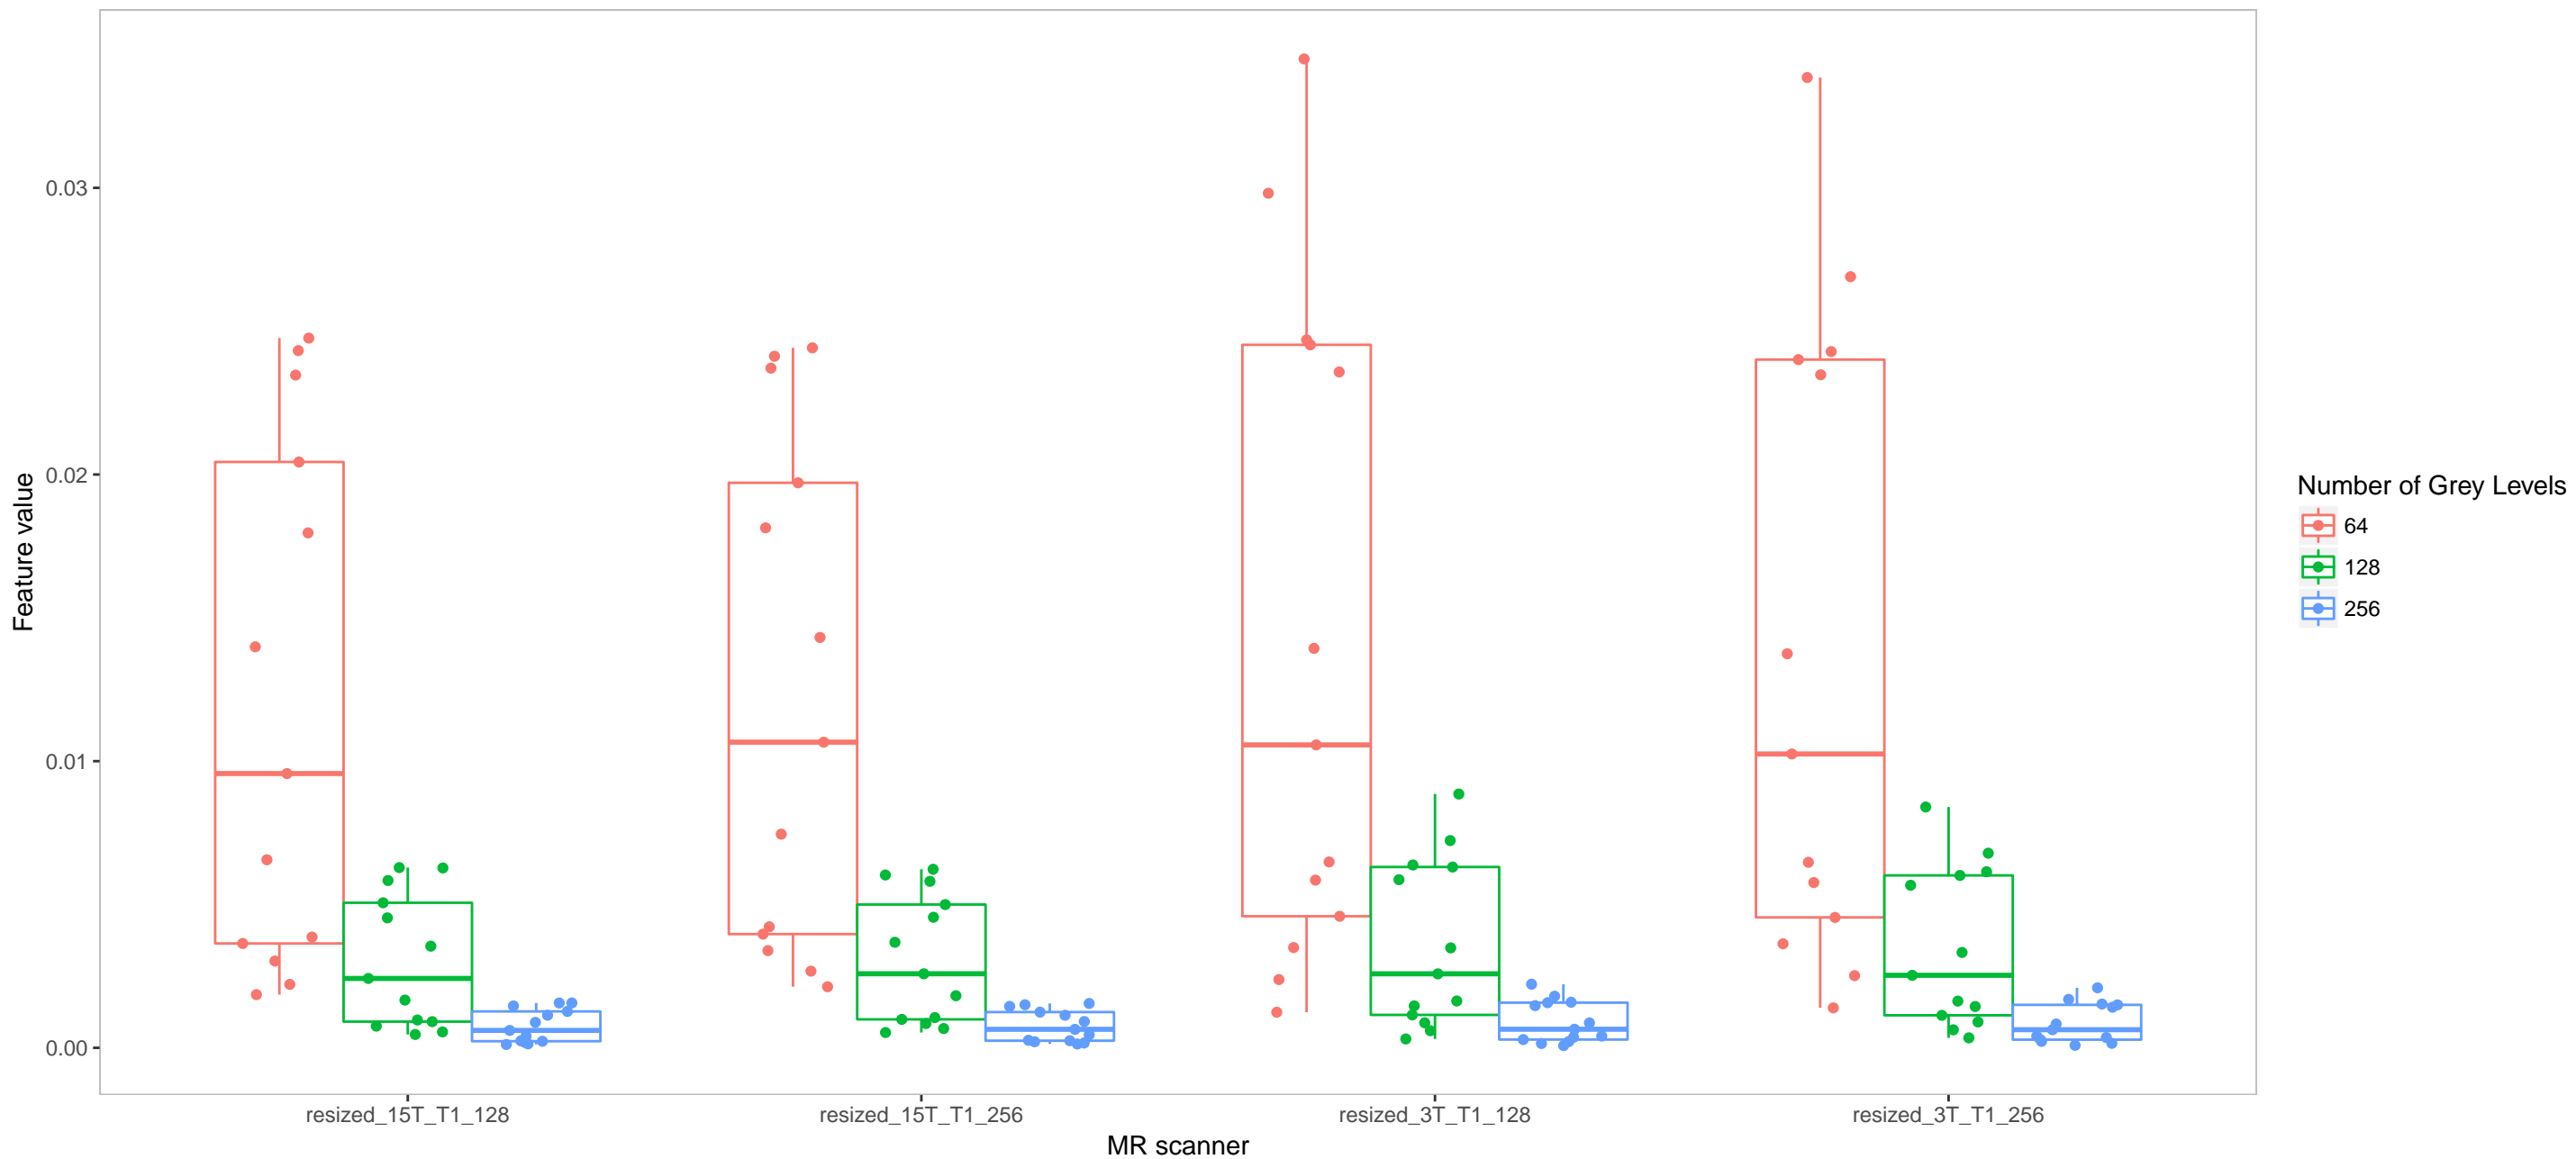

HGRE

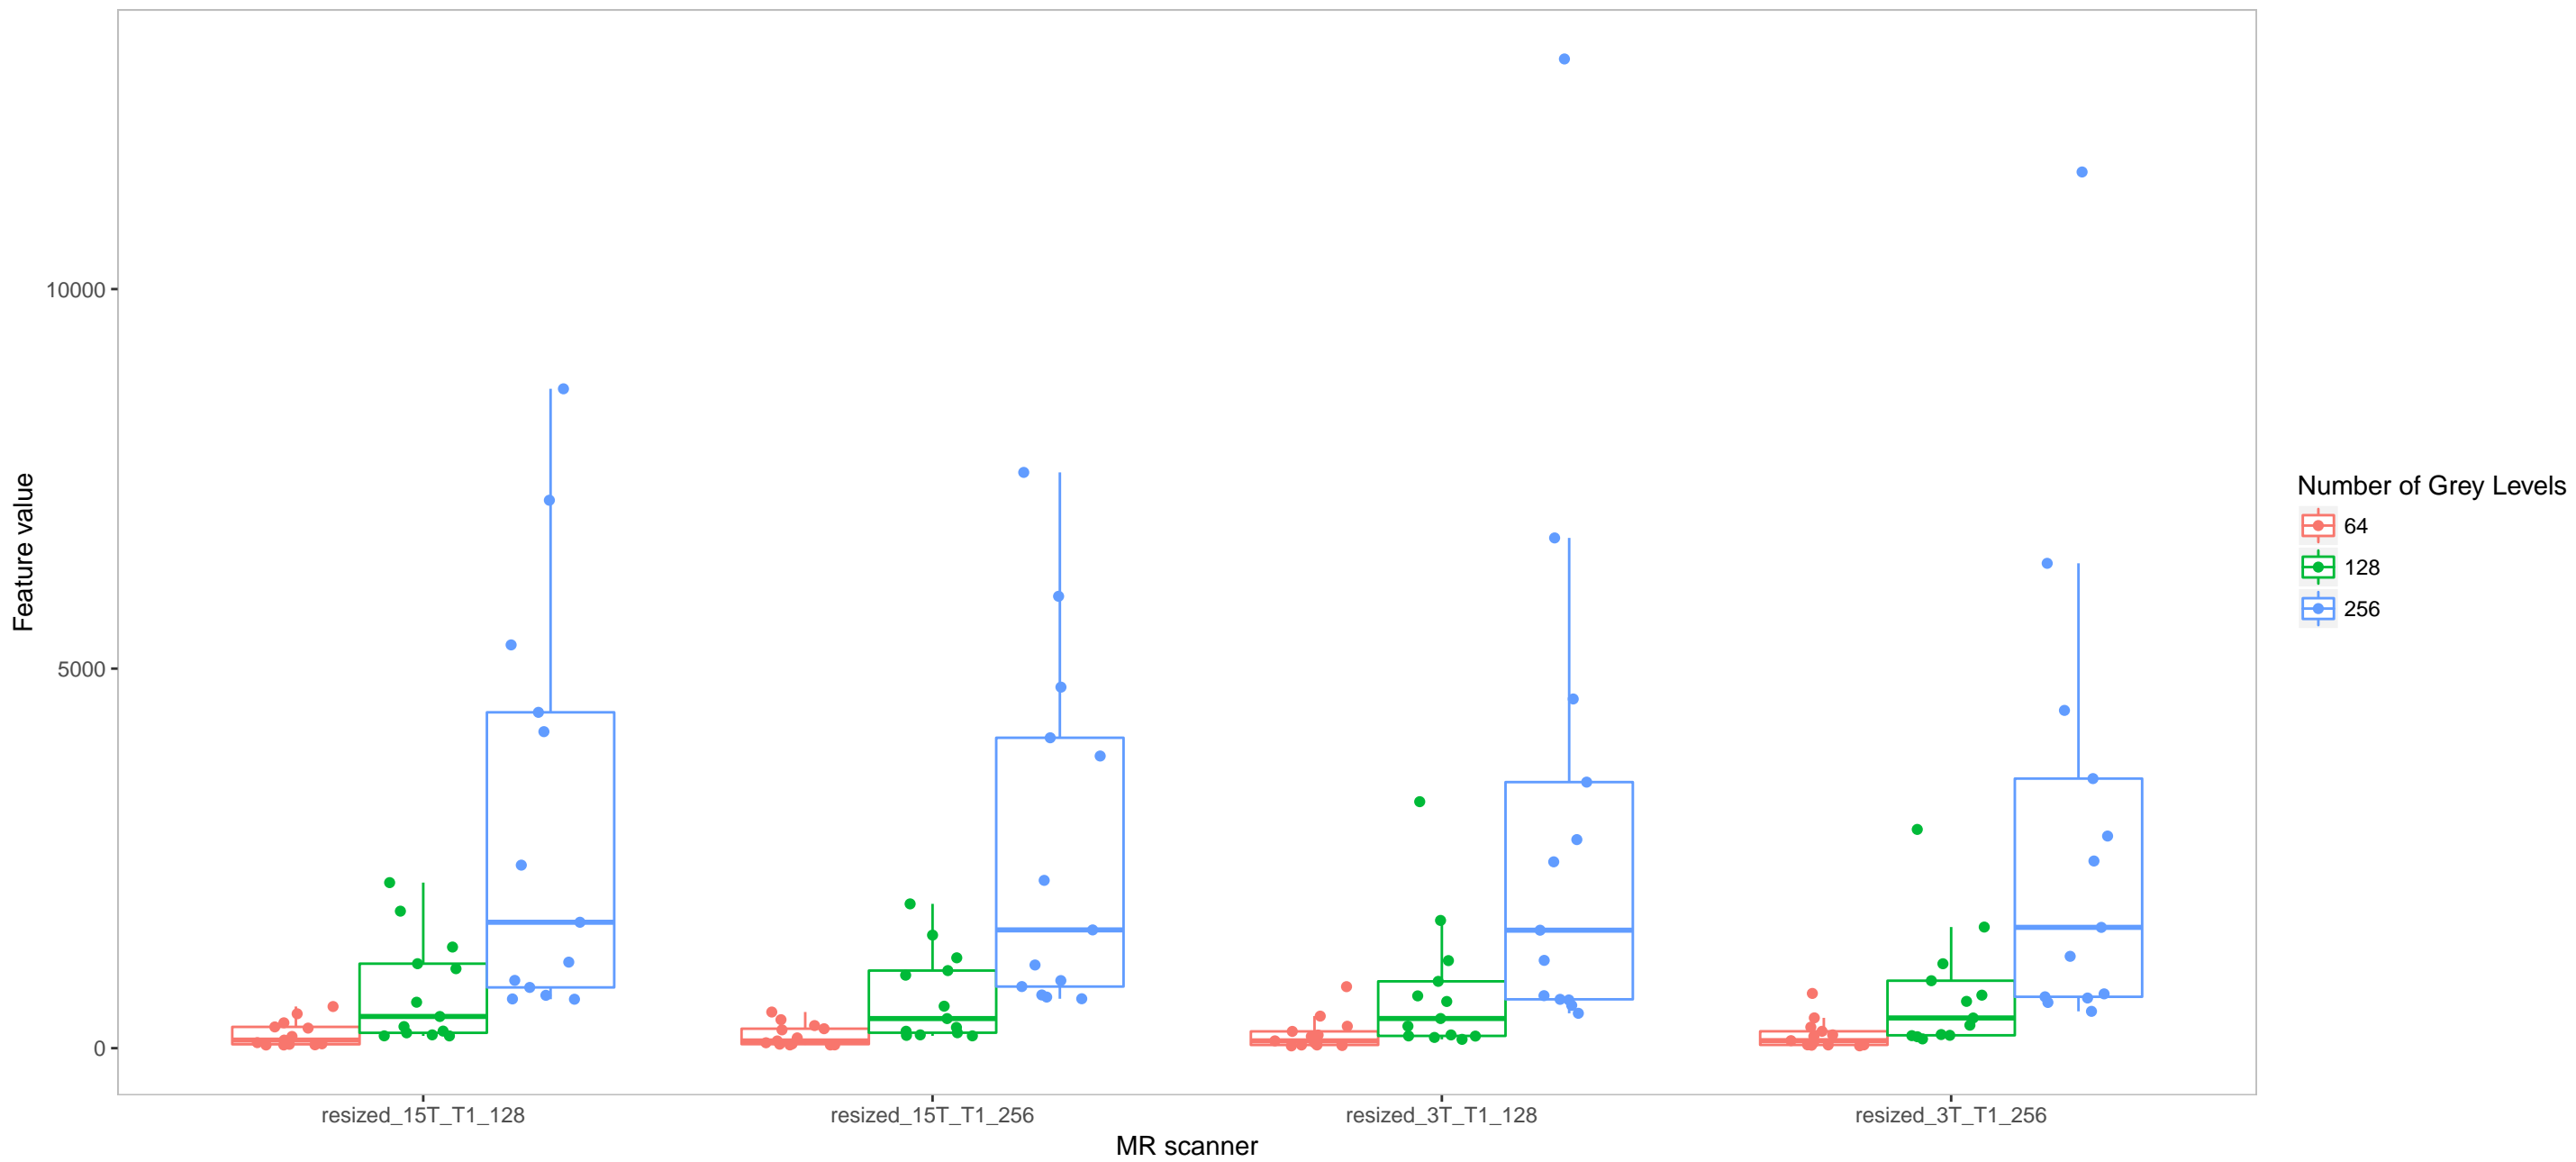

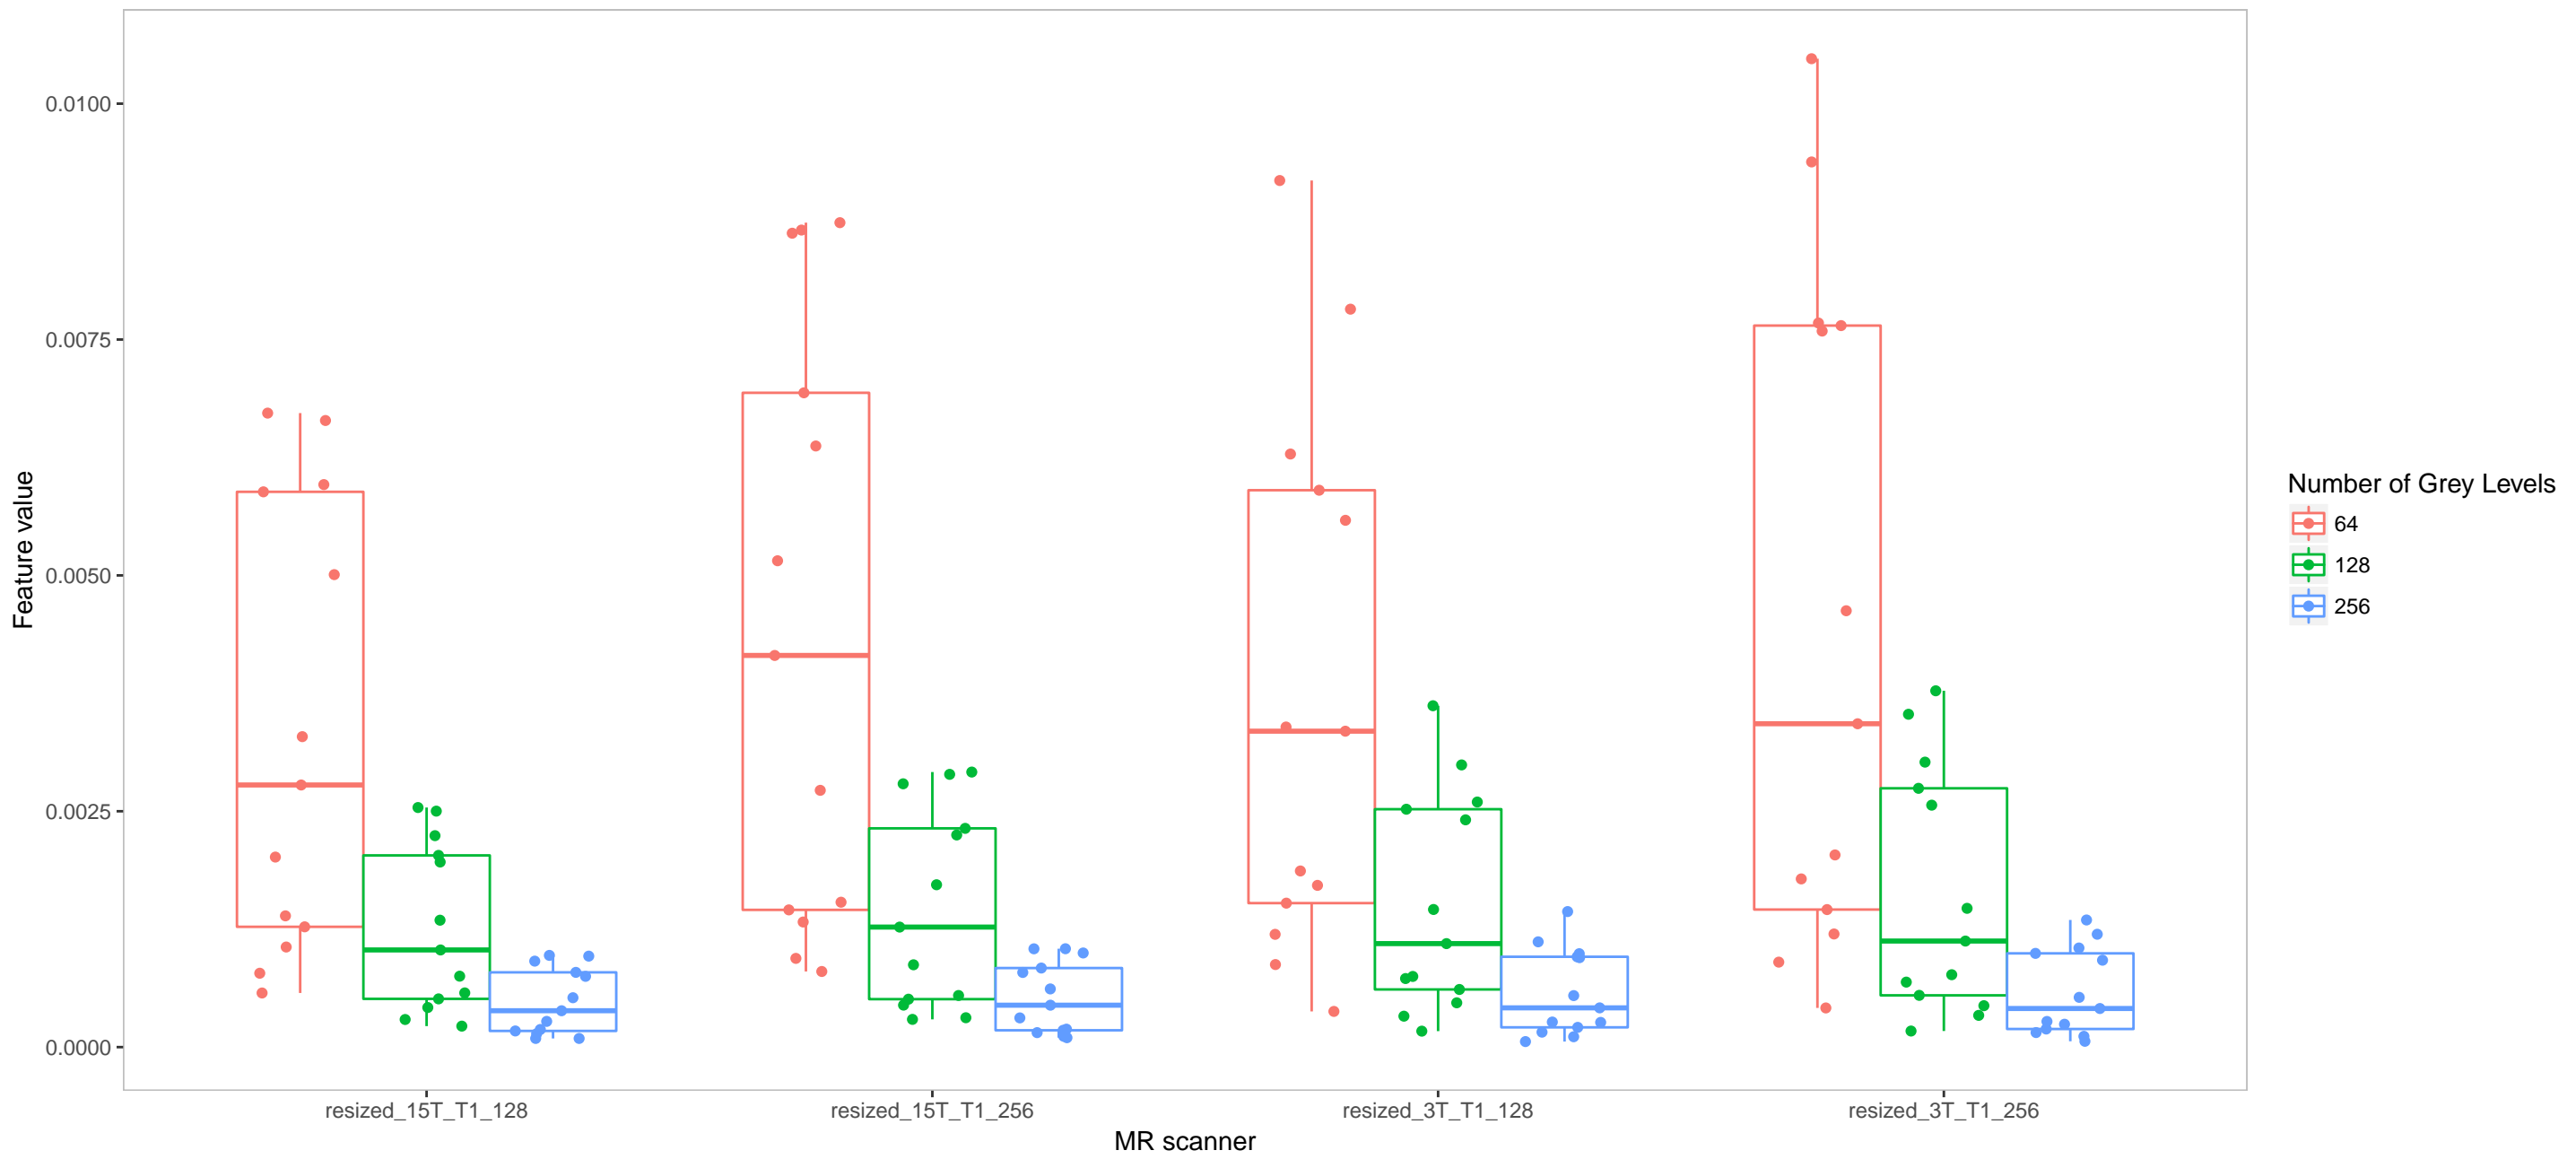

# SRHGE

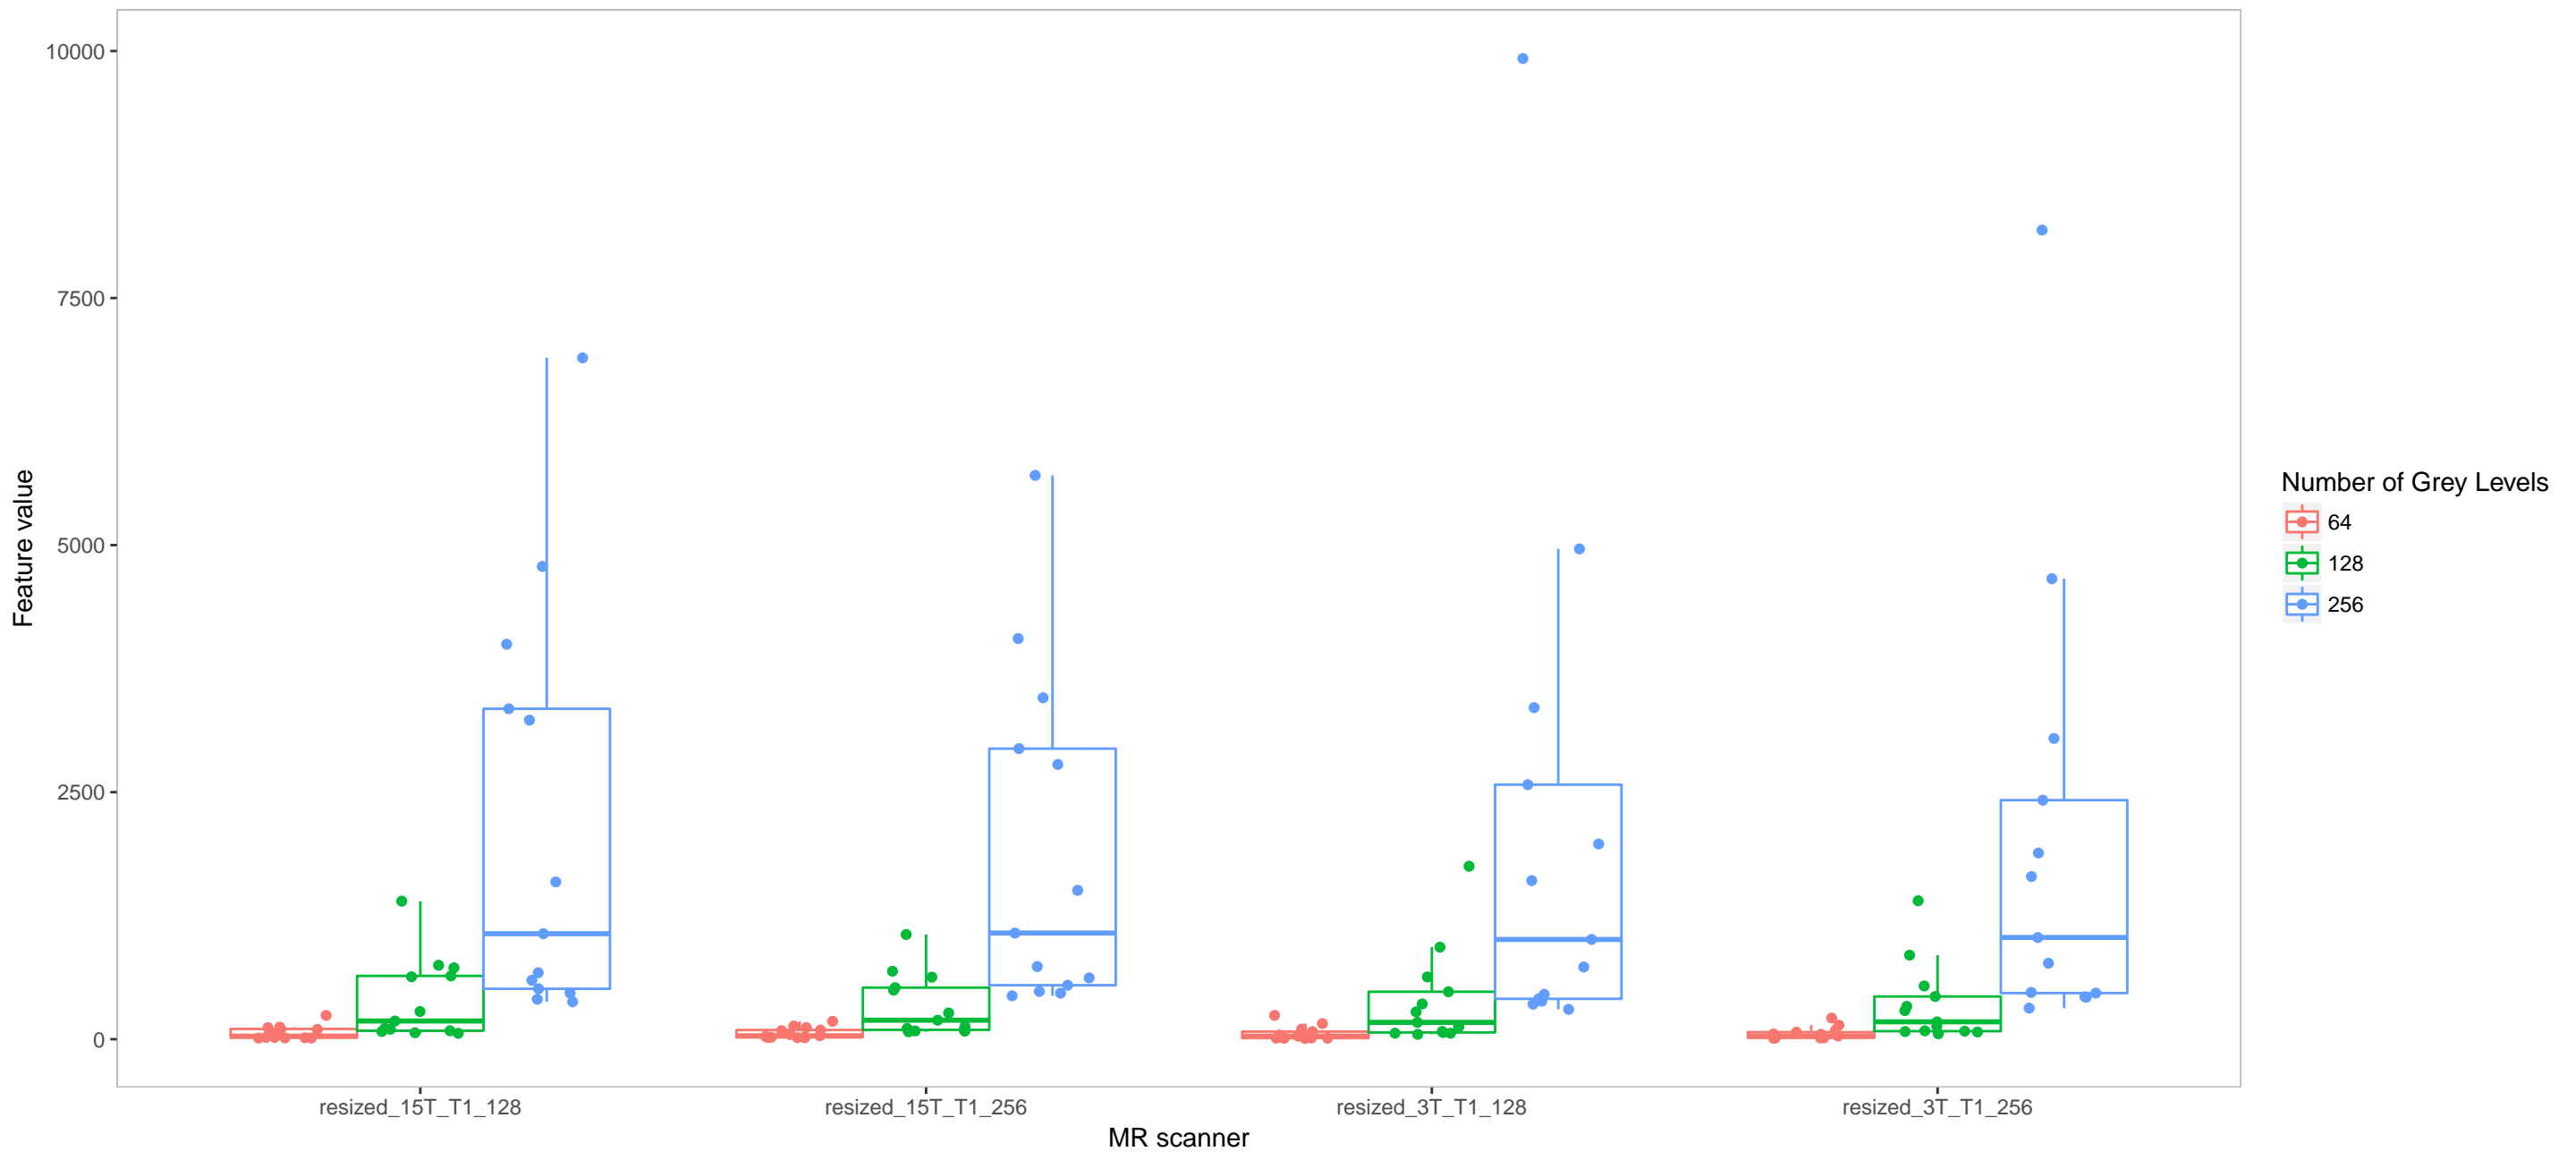

# LRLGE

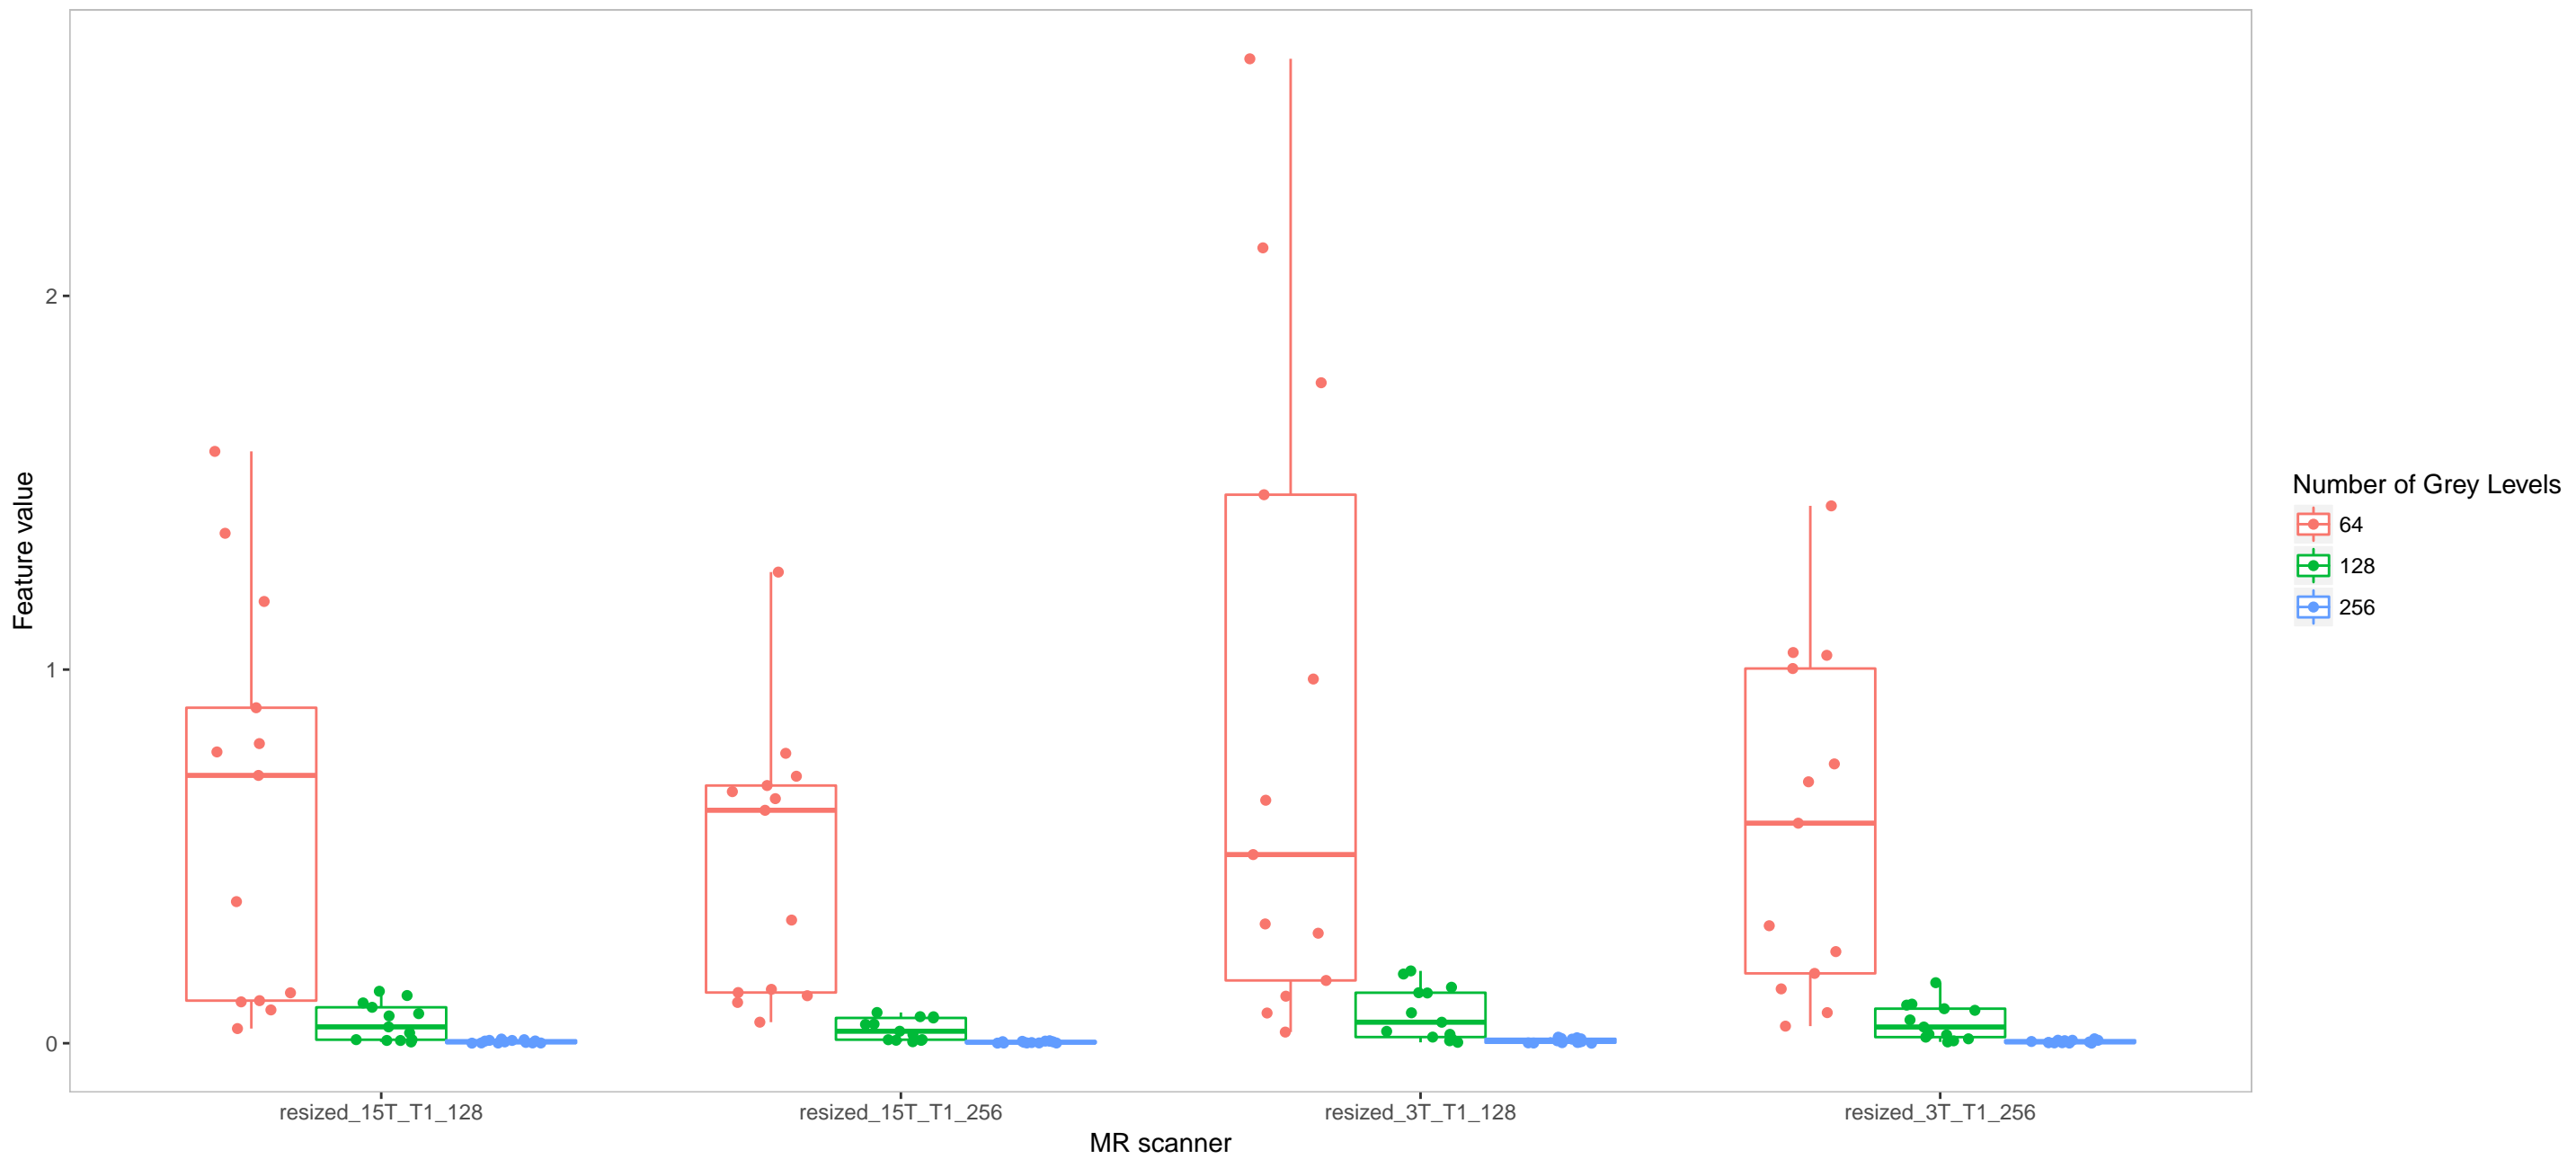

# LRHGE

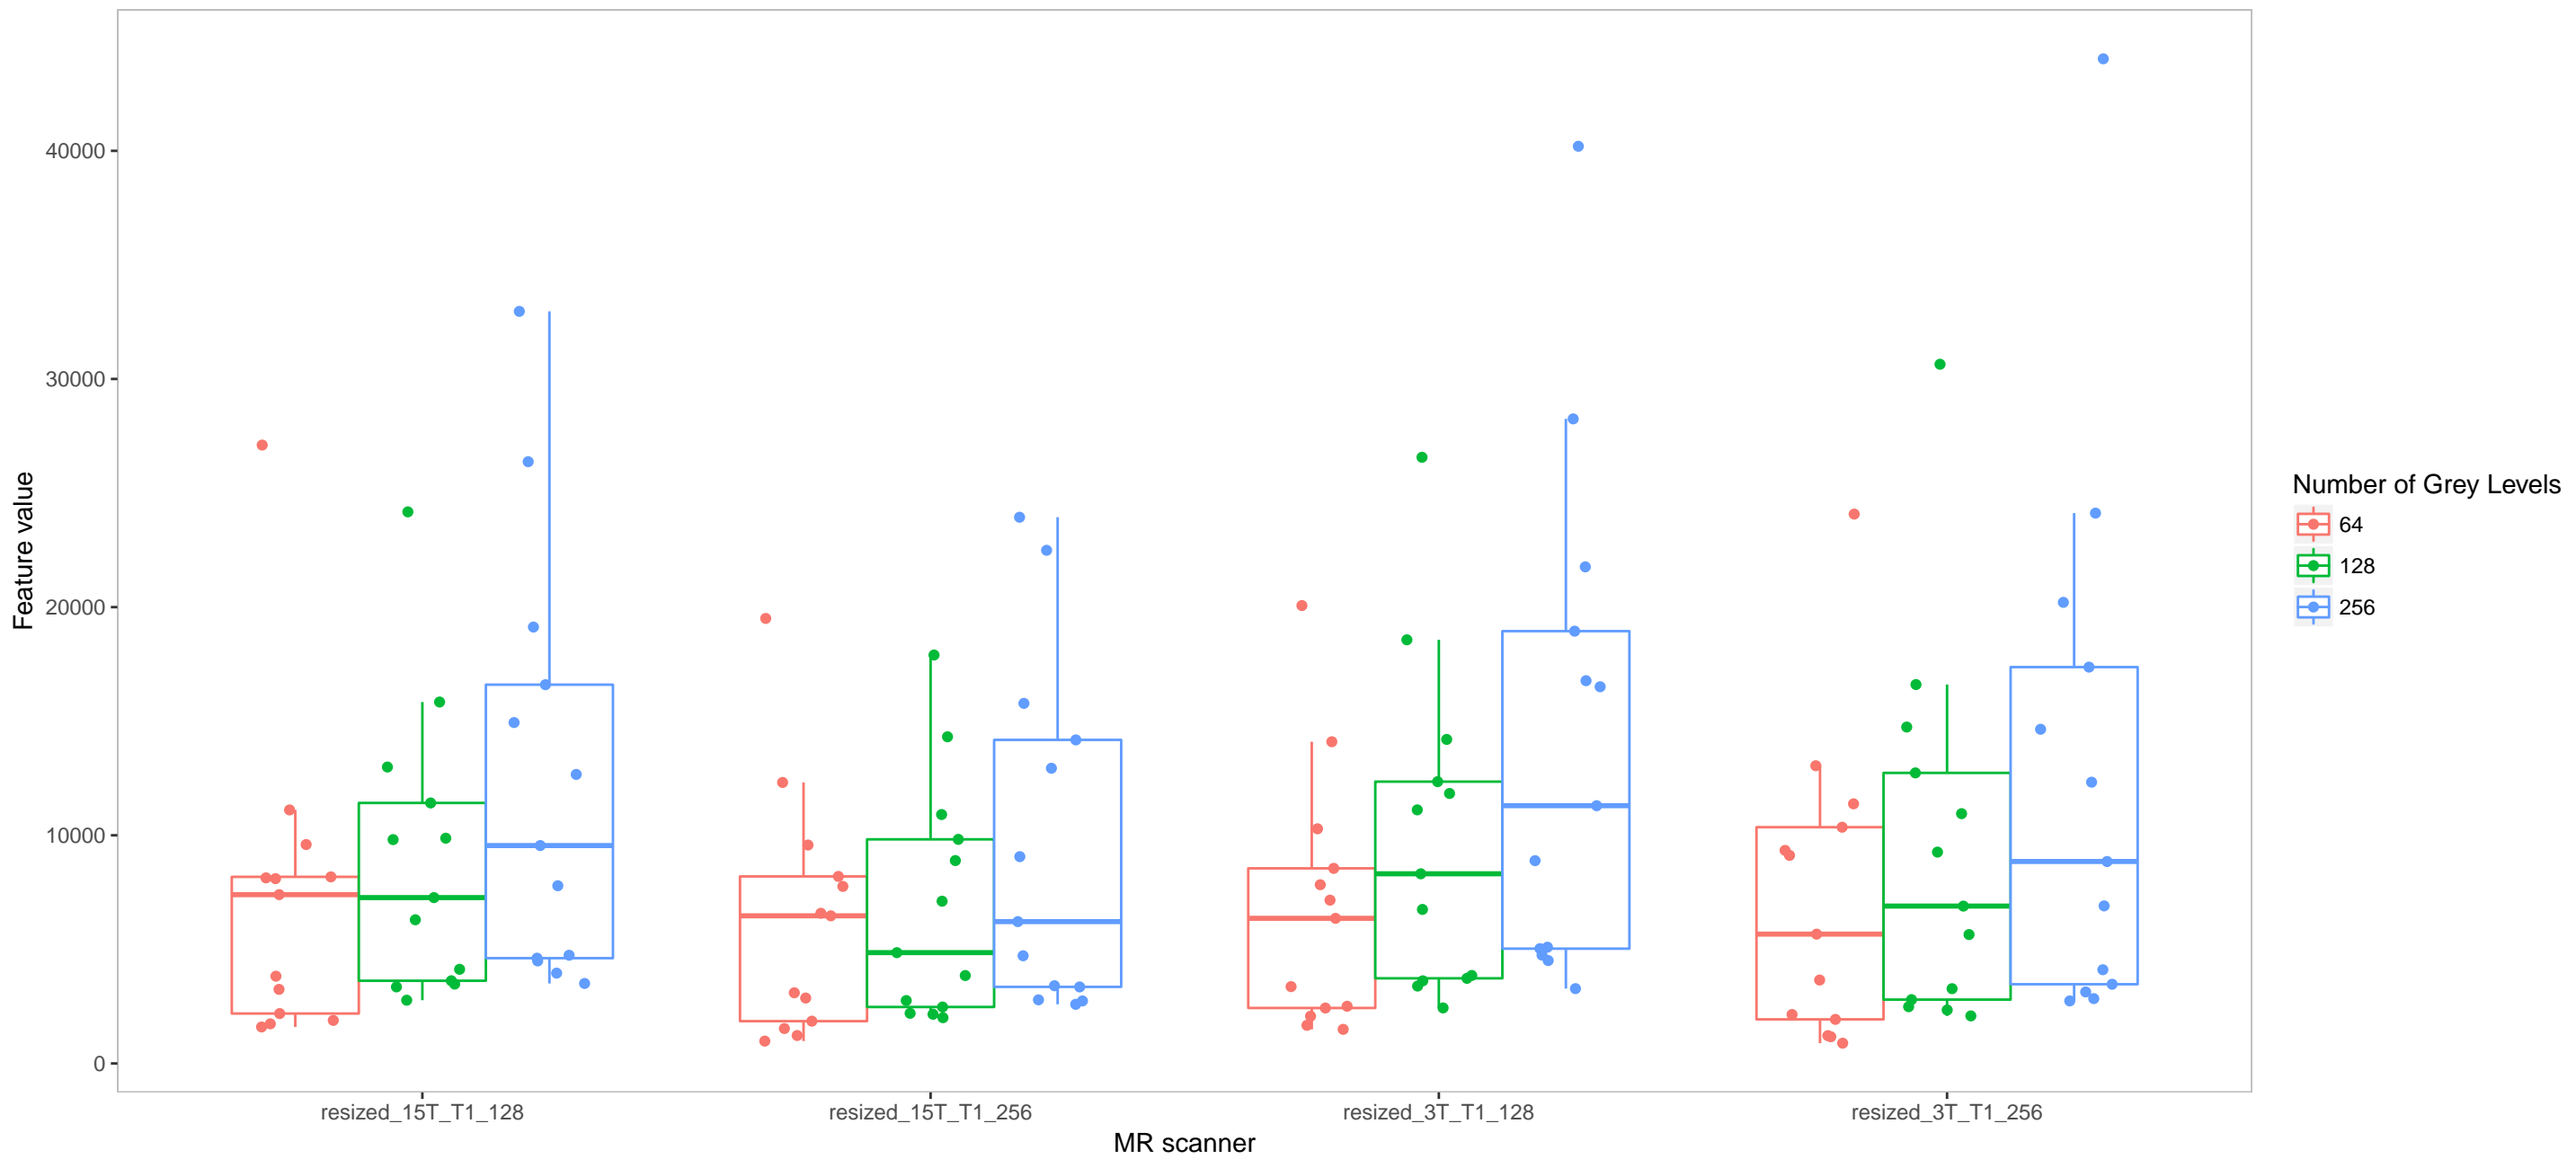

# GLNU

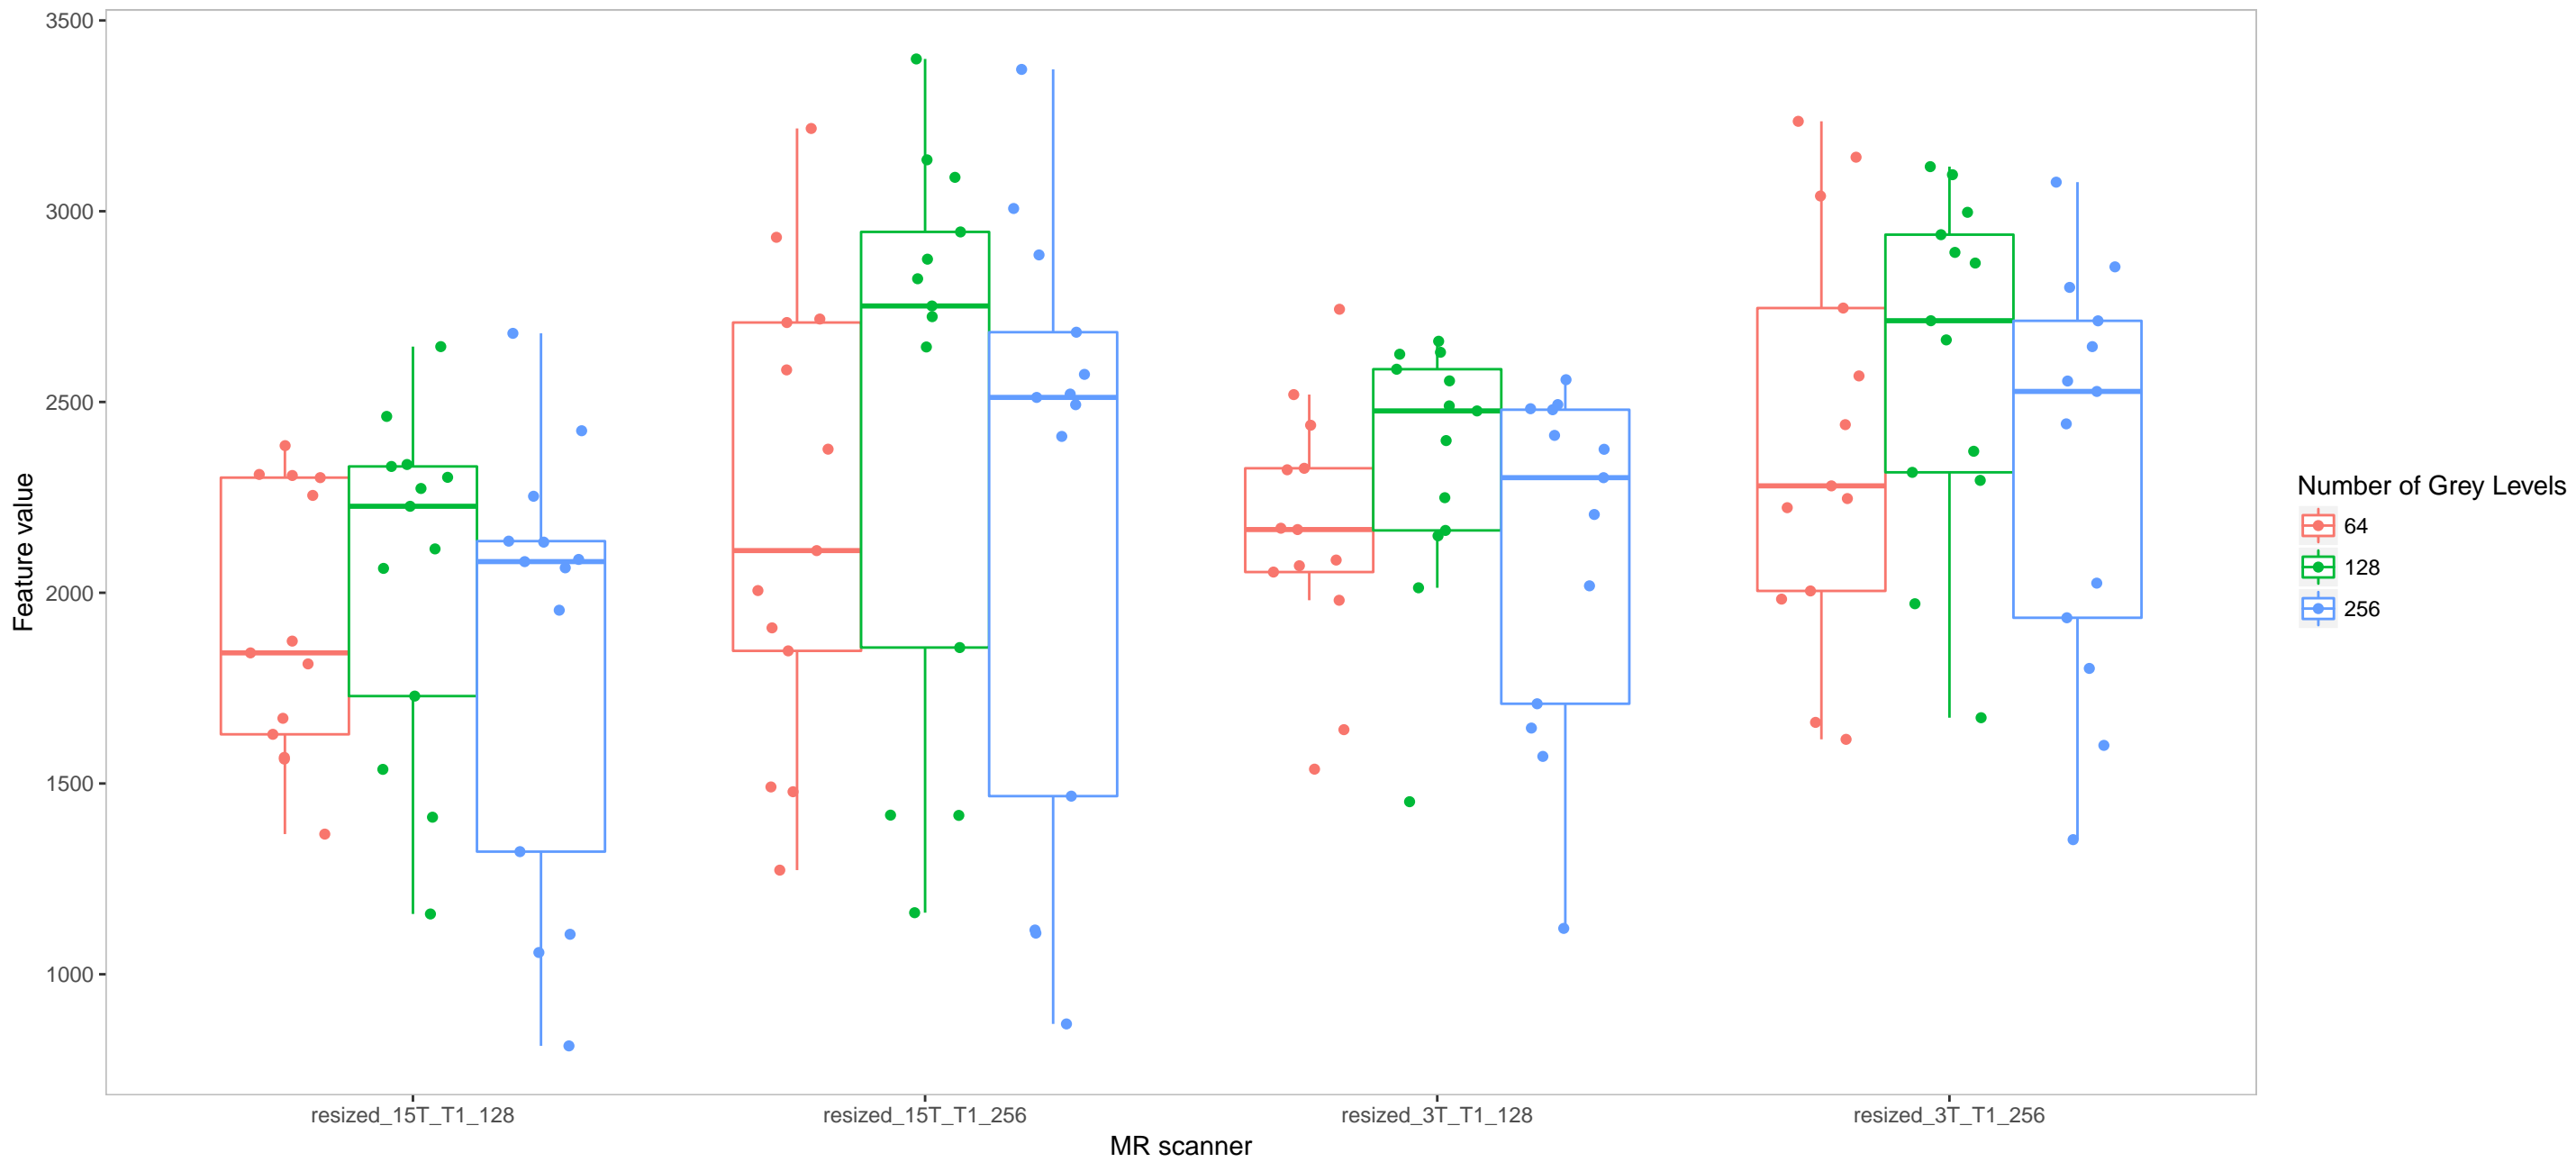

RLNU

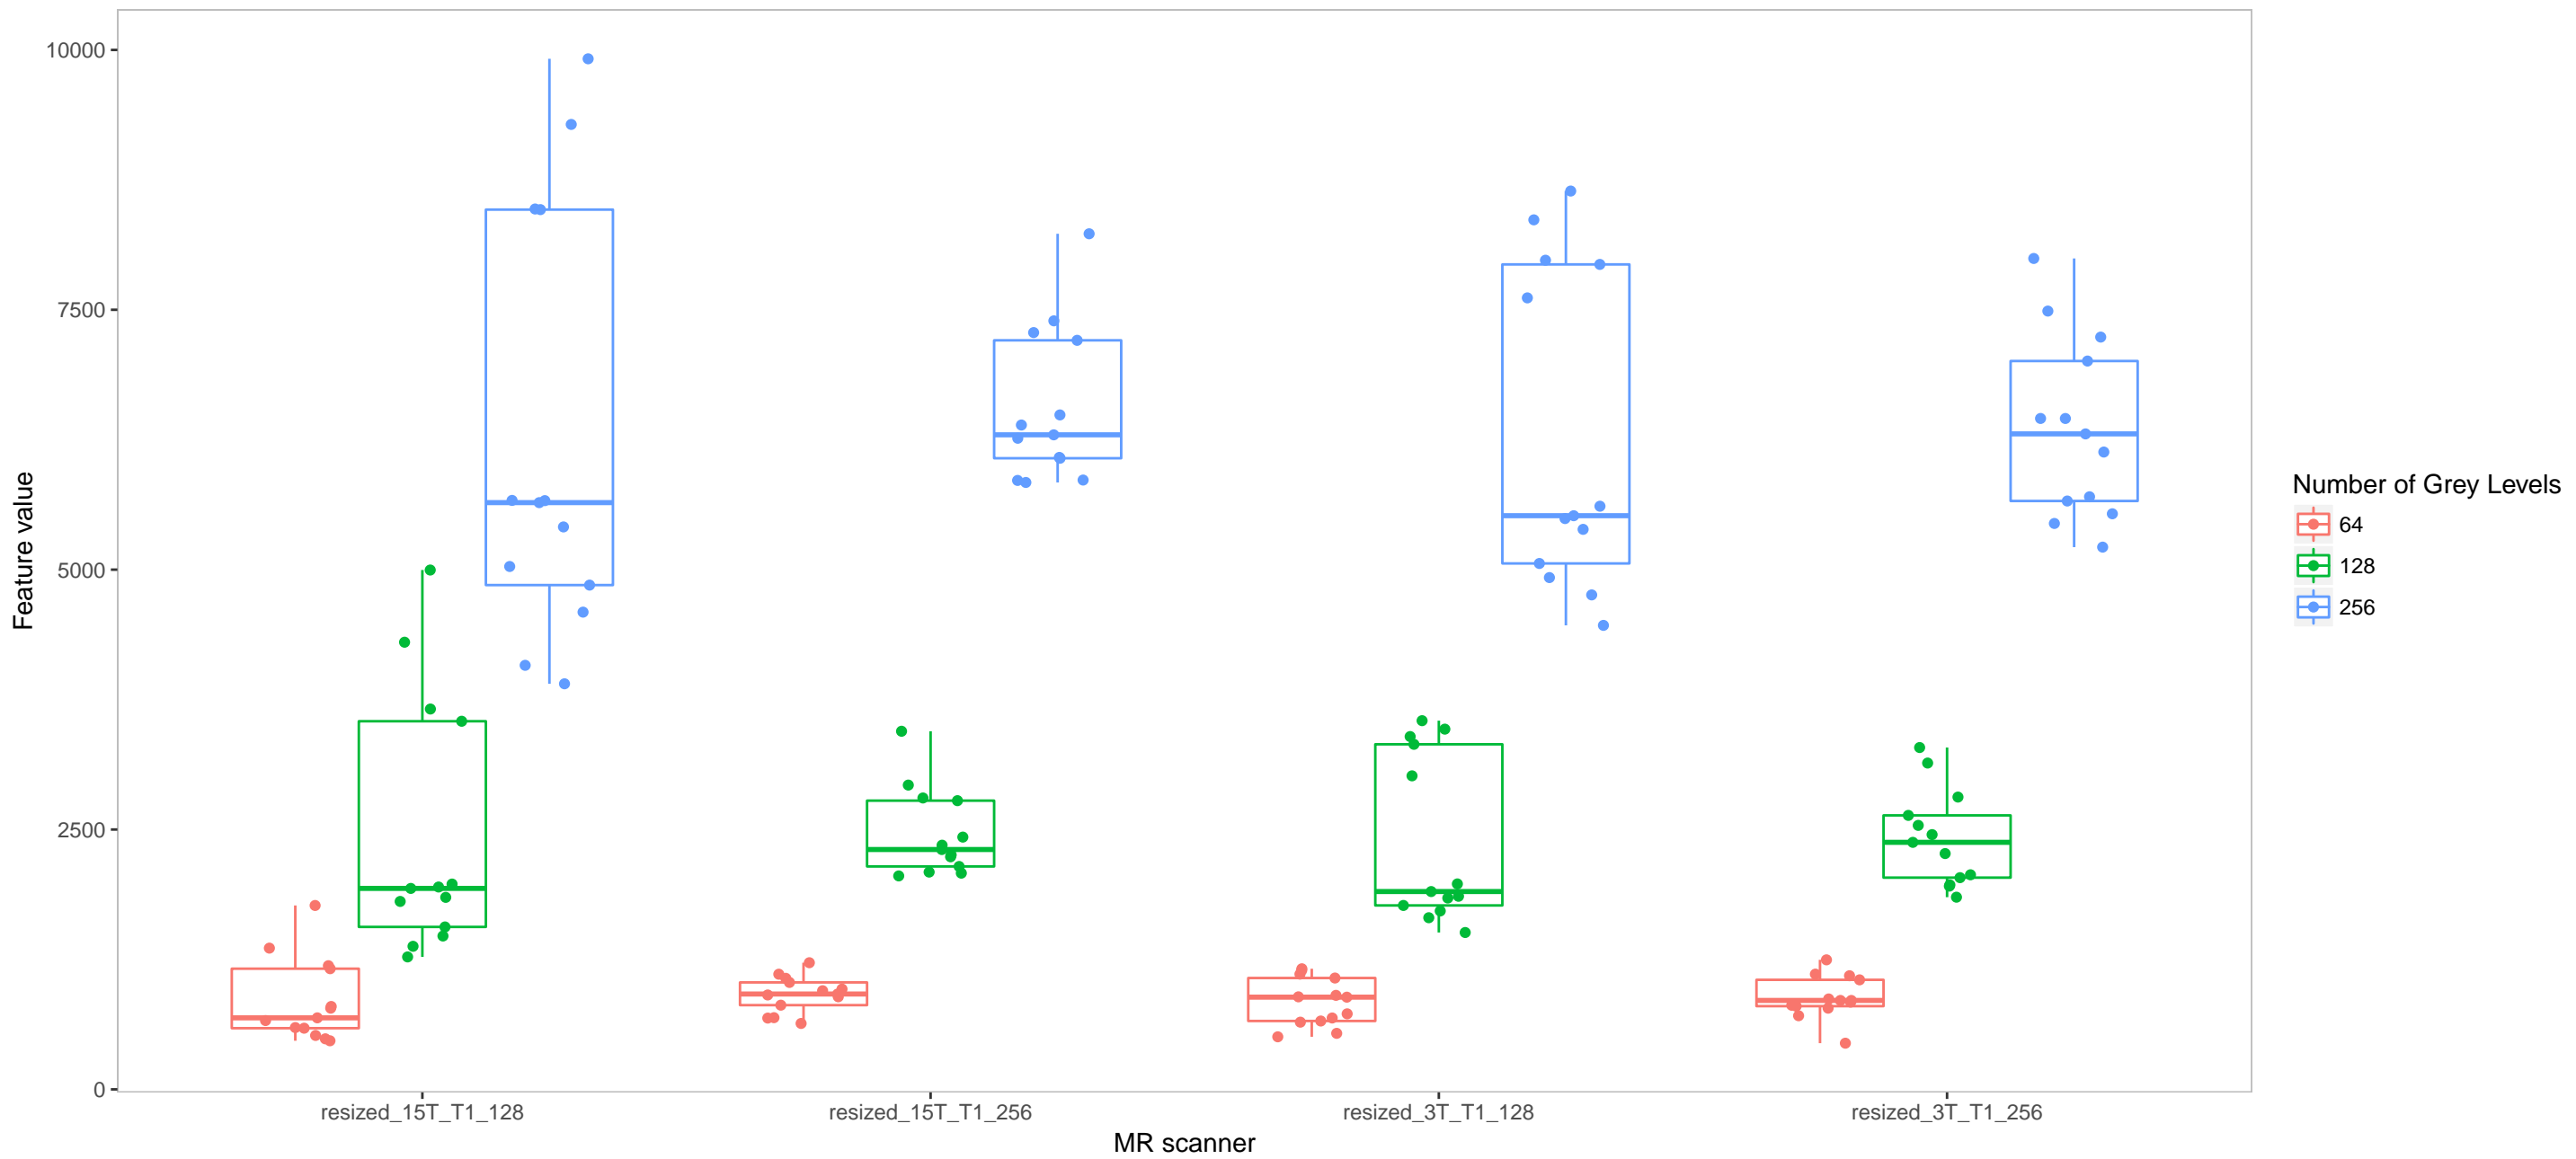



RP

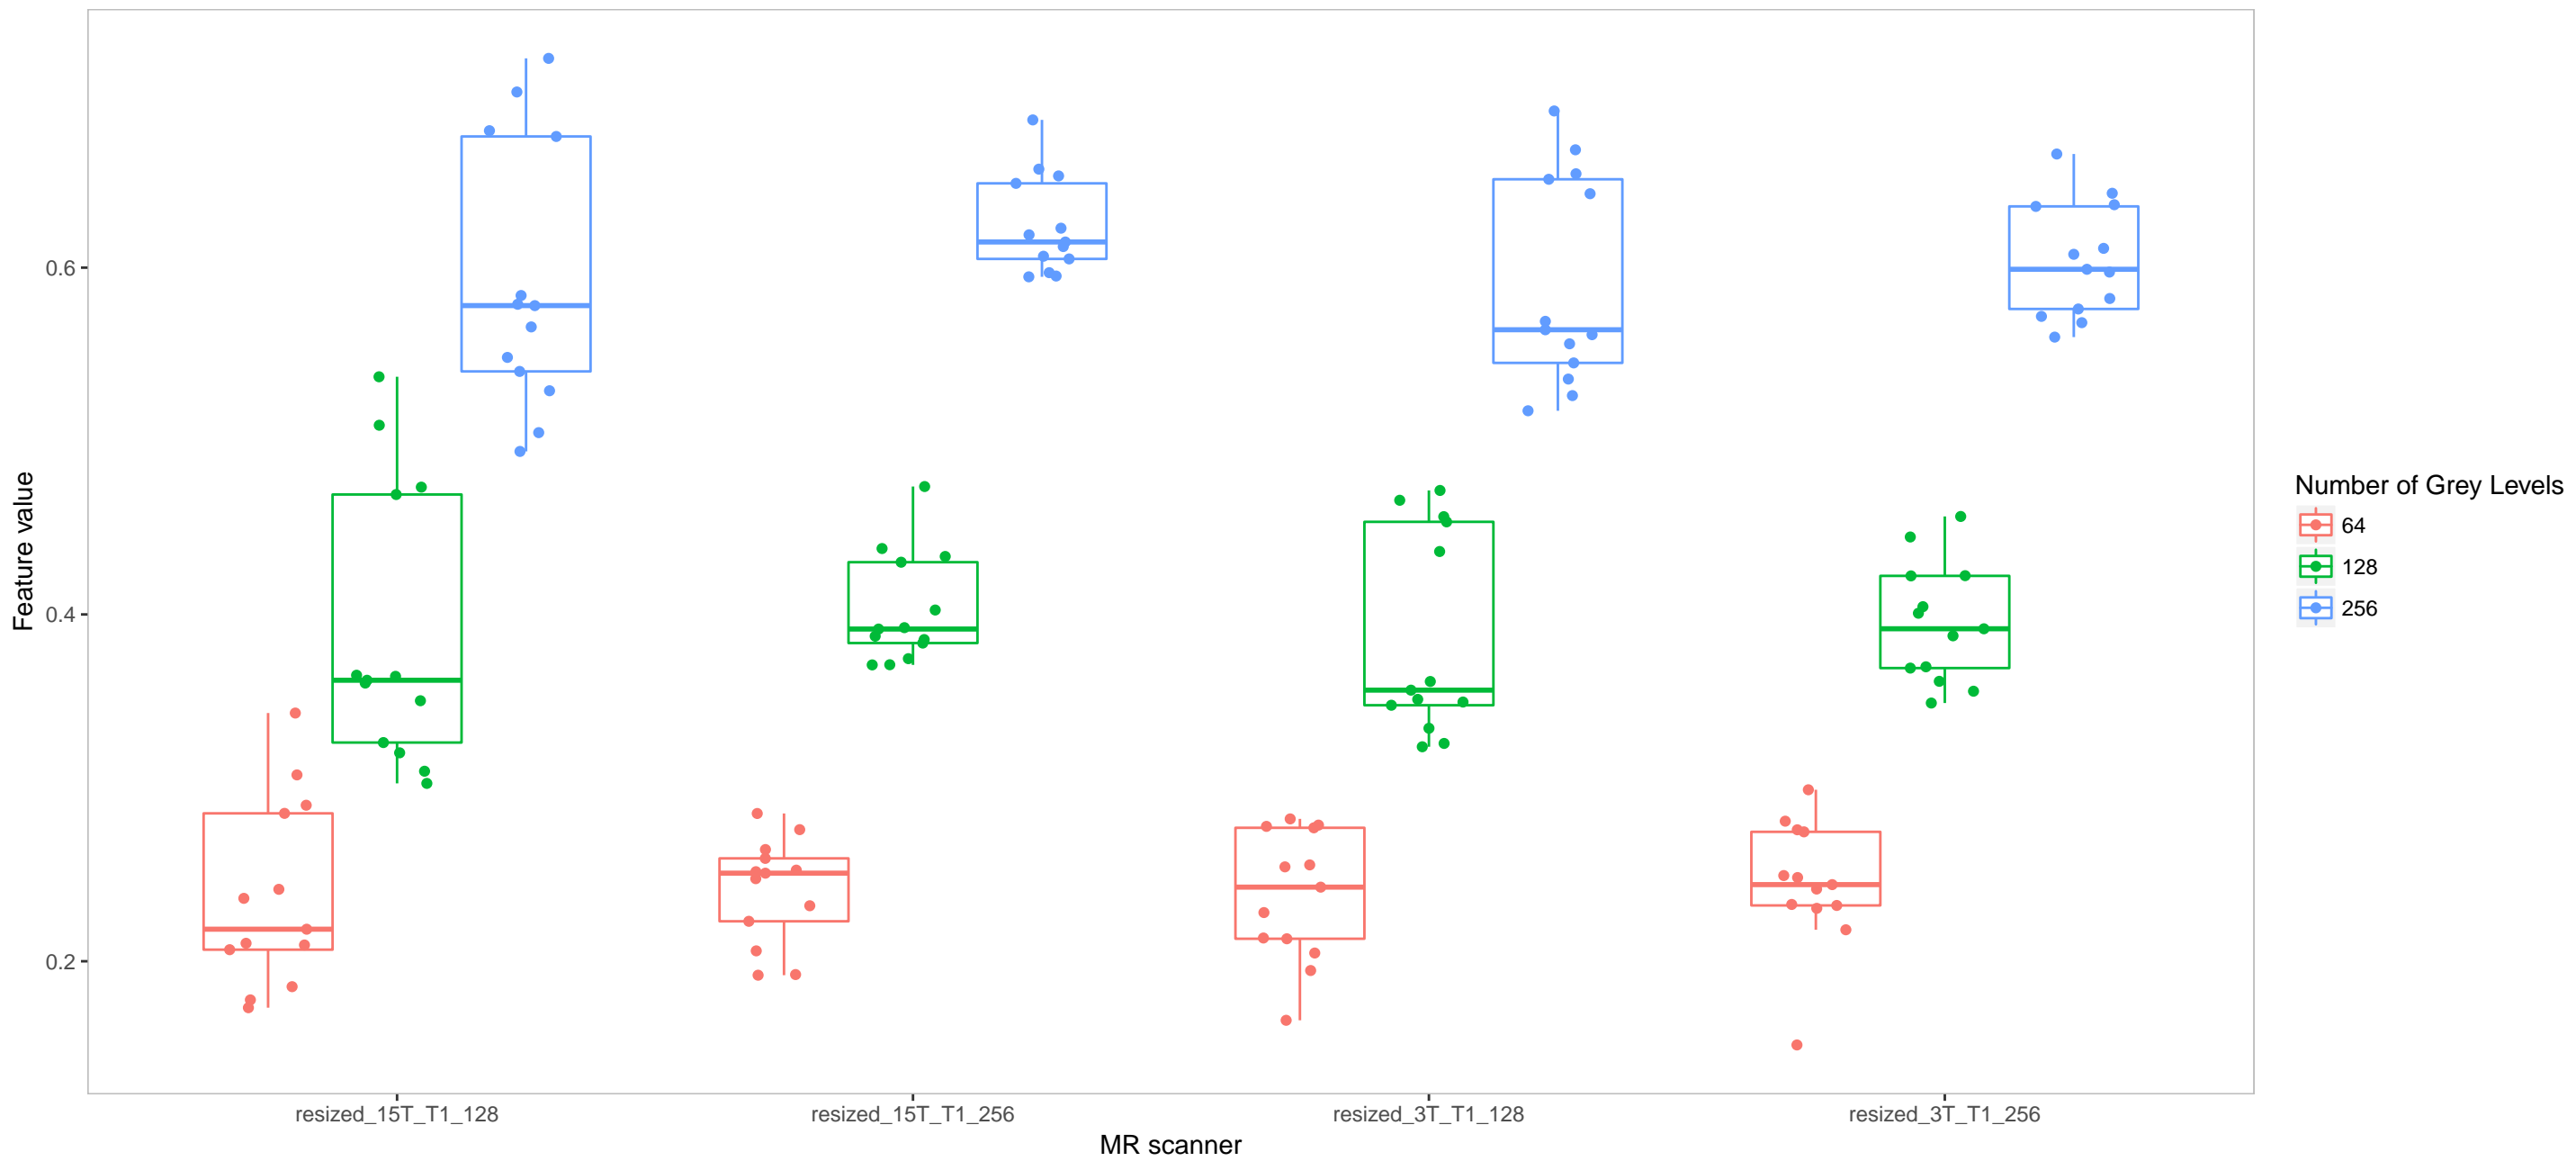

# Coarseness

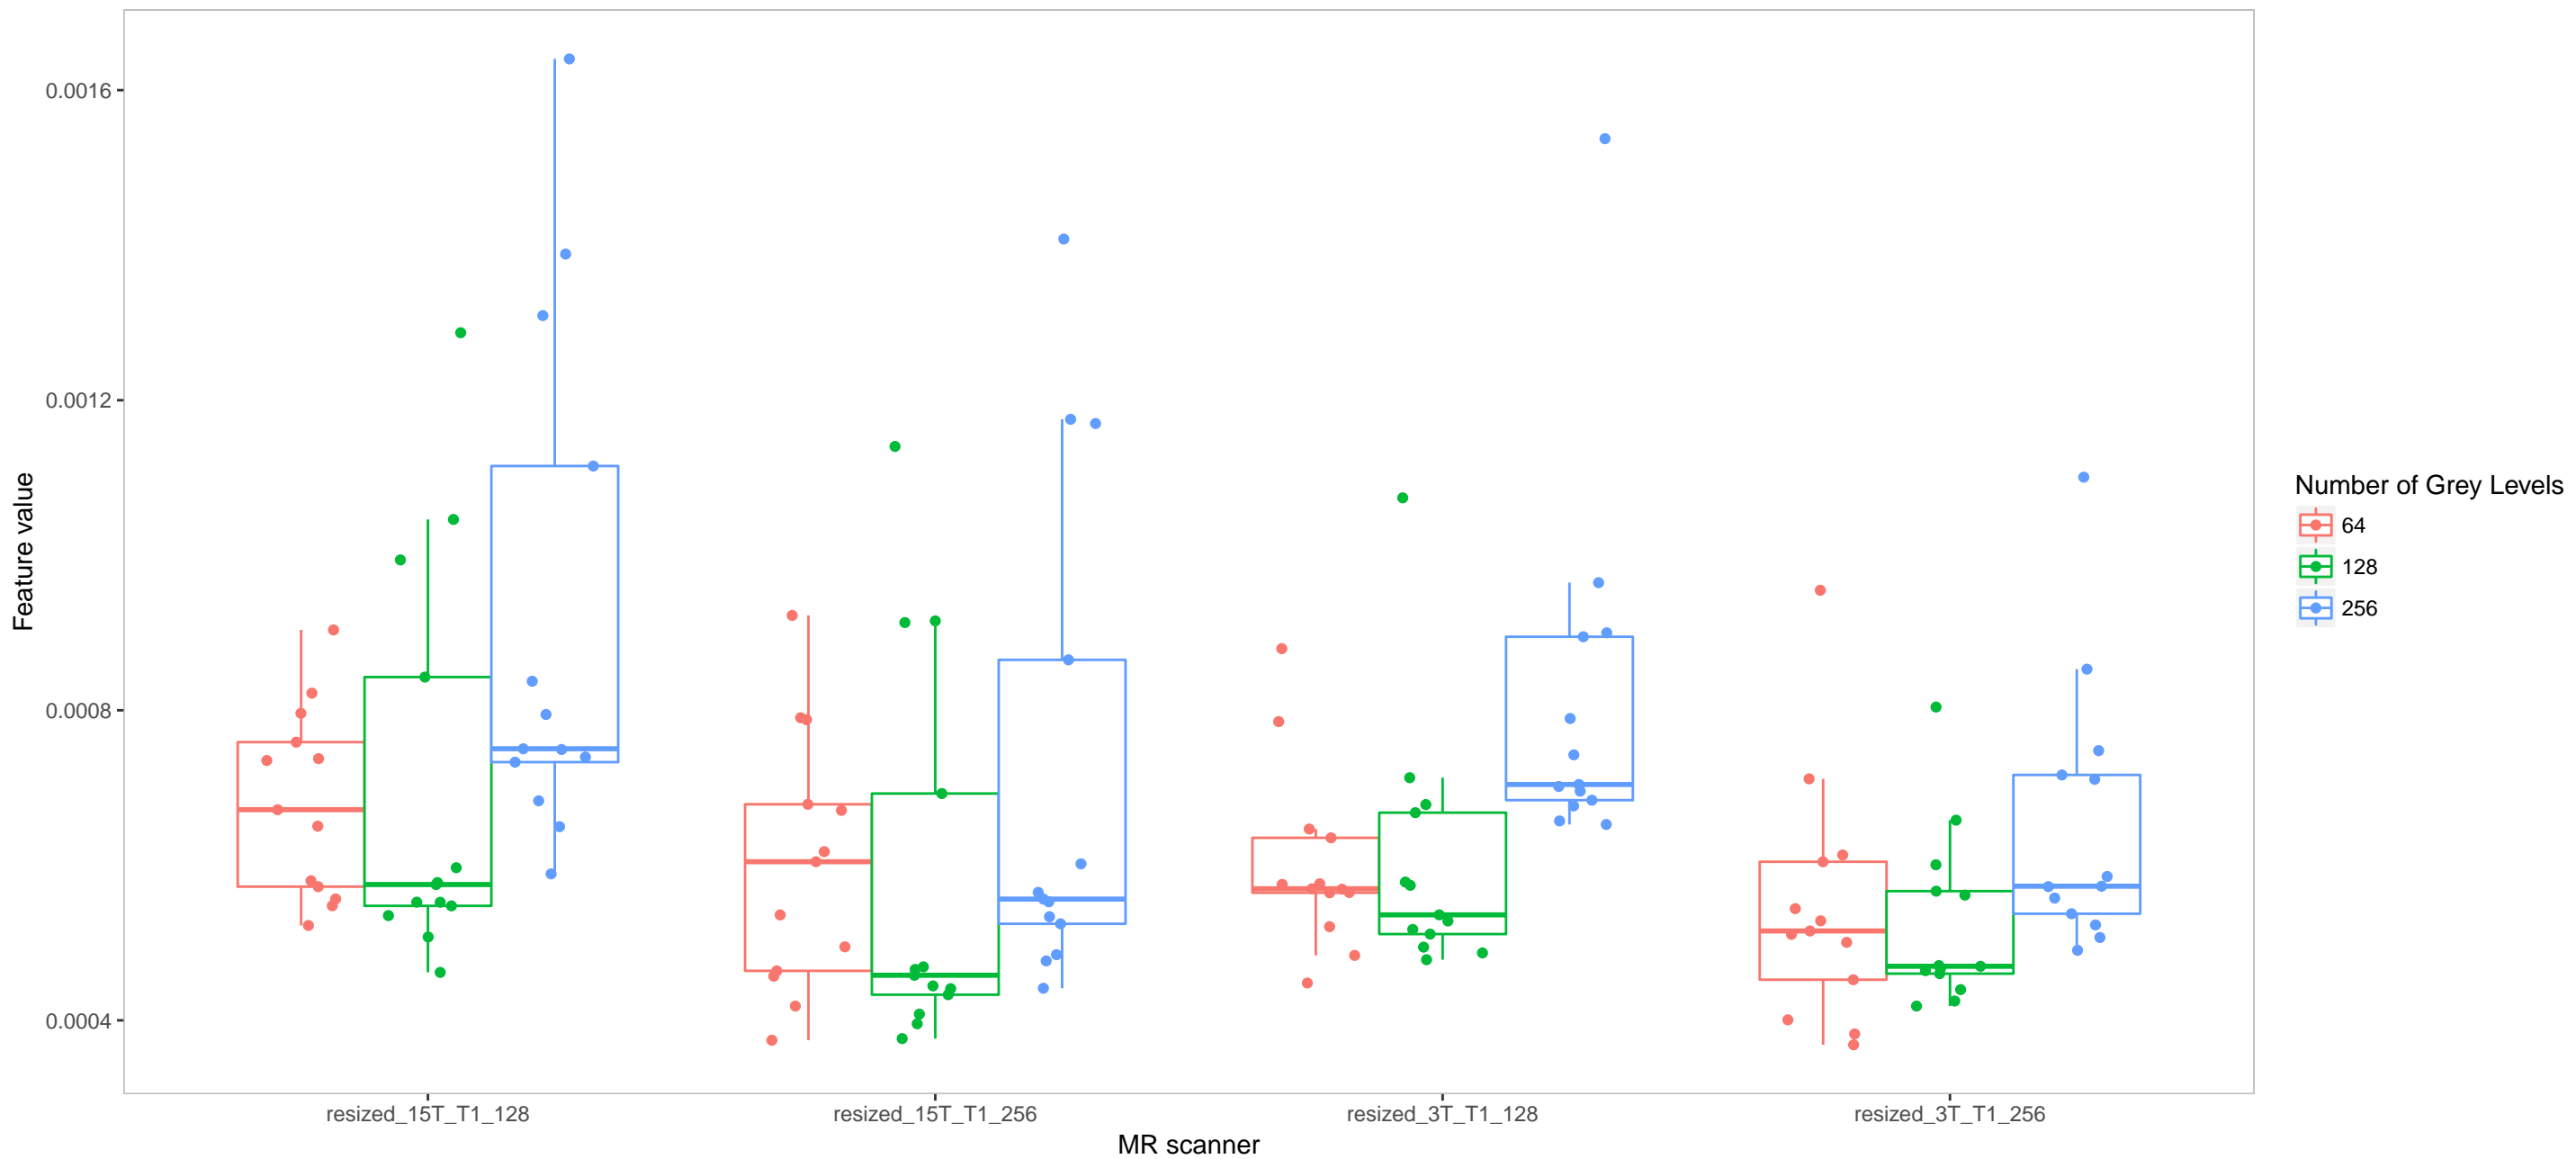

Contrast\_1

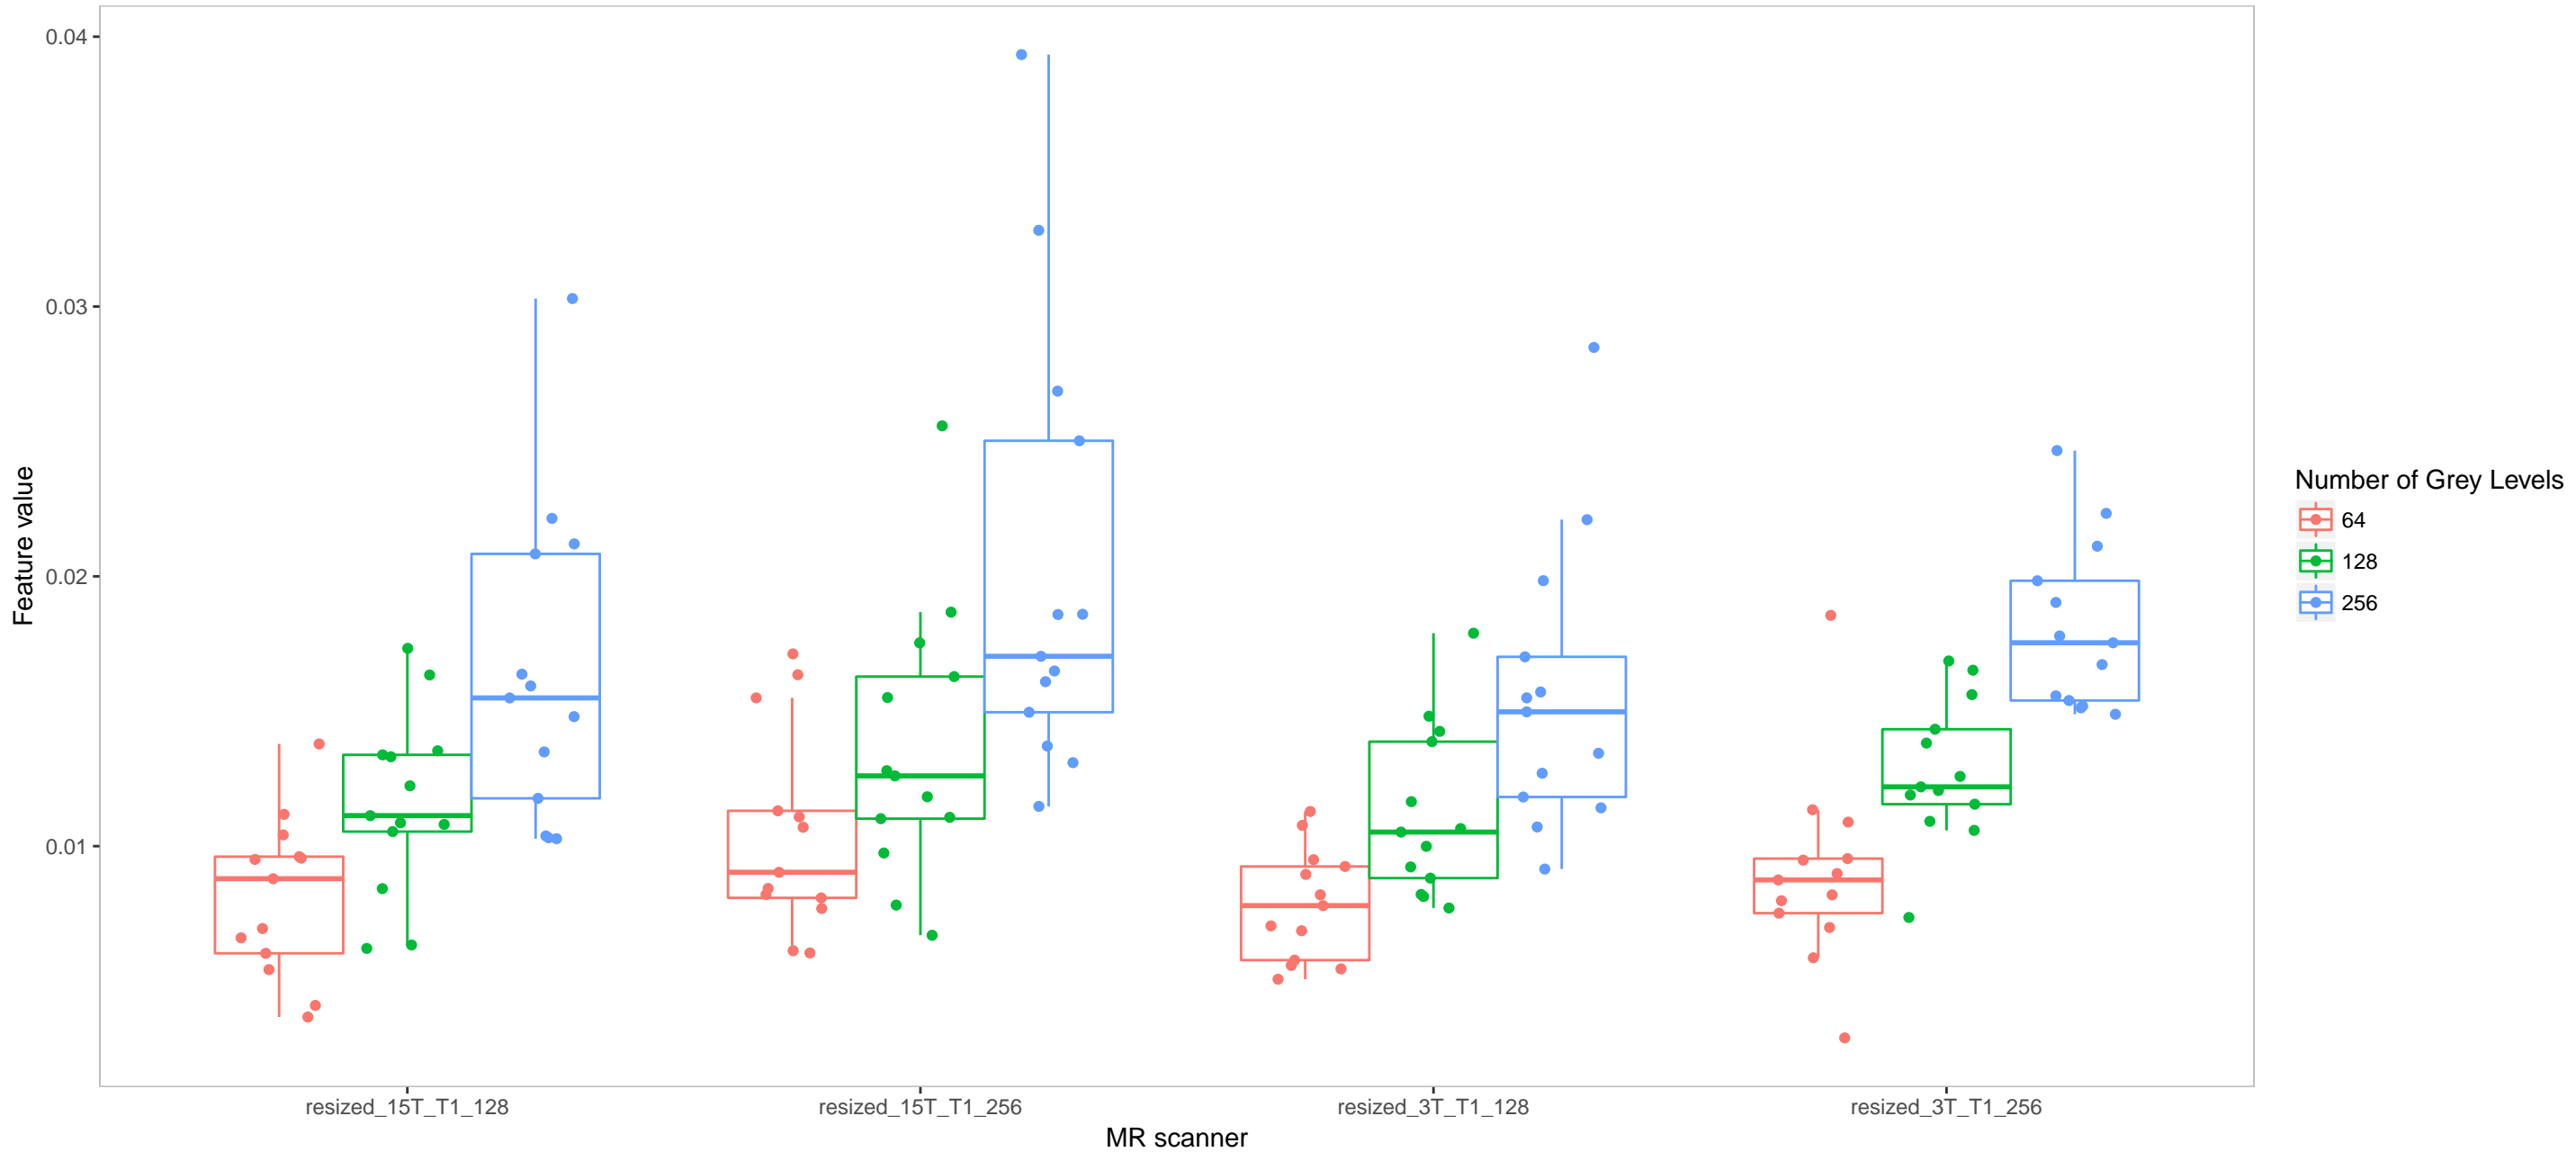

SZE

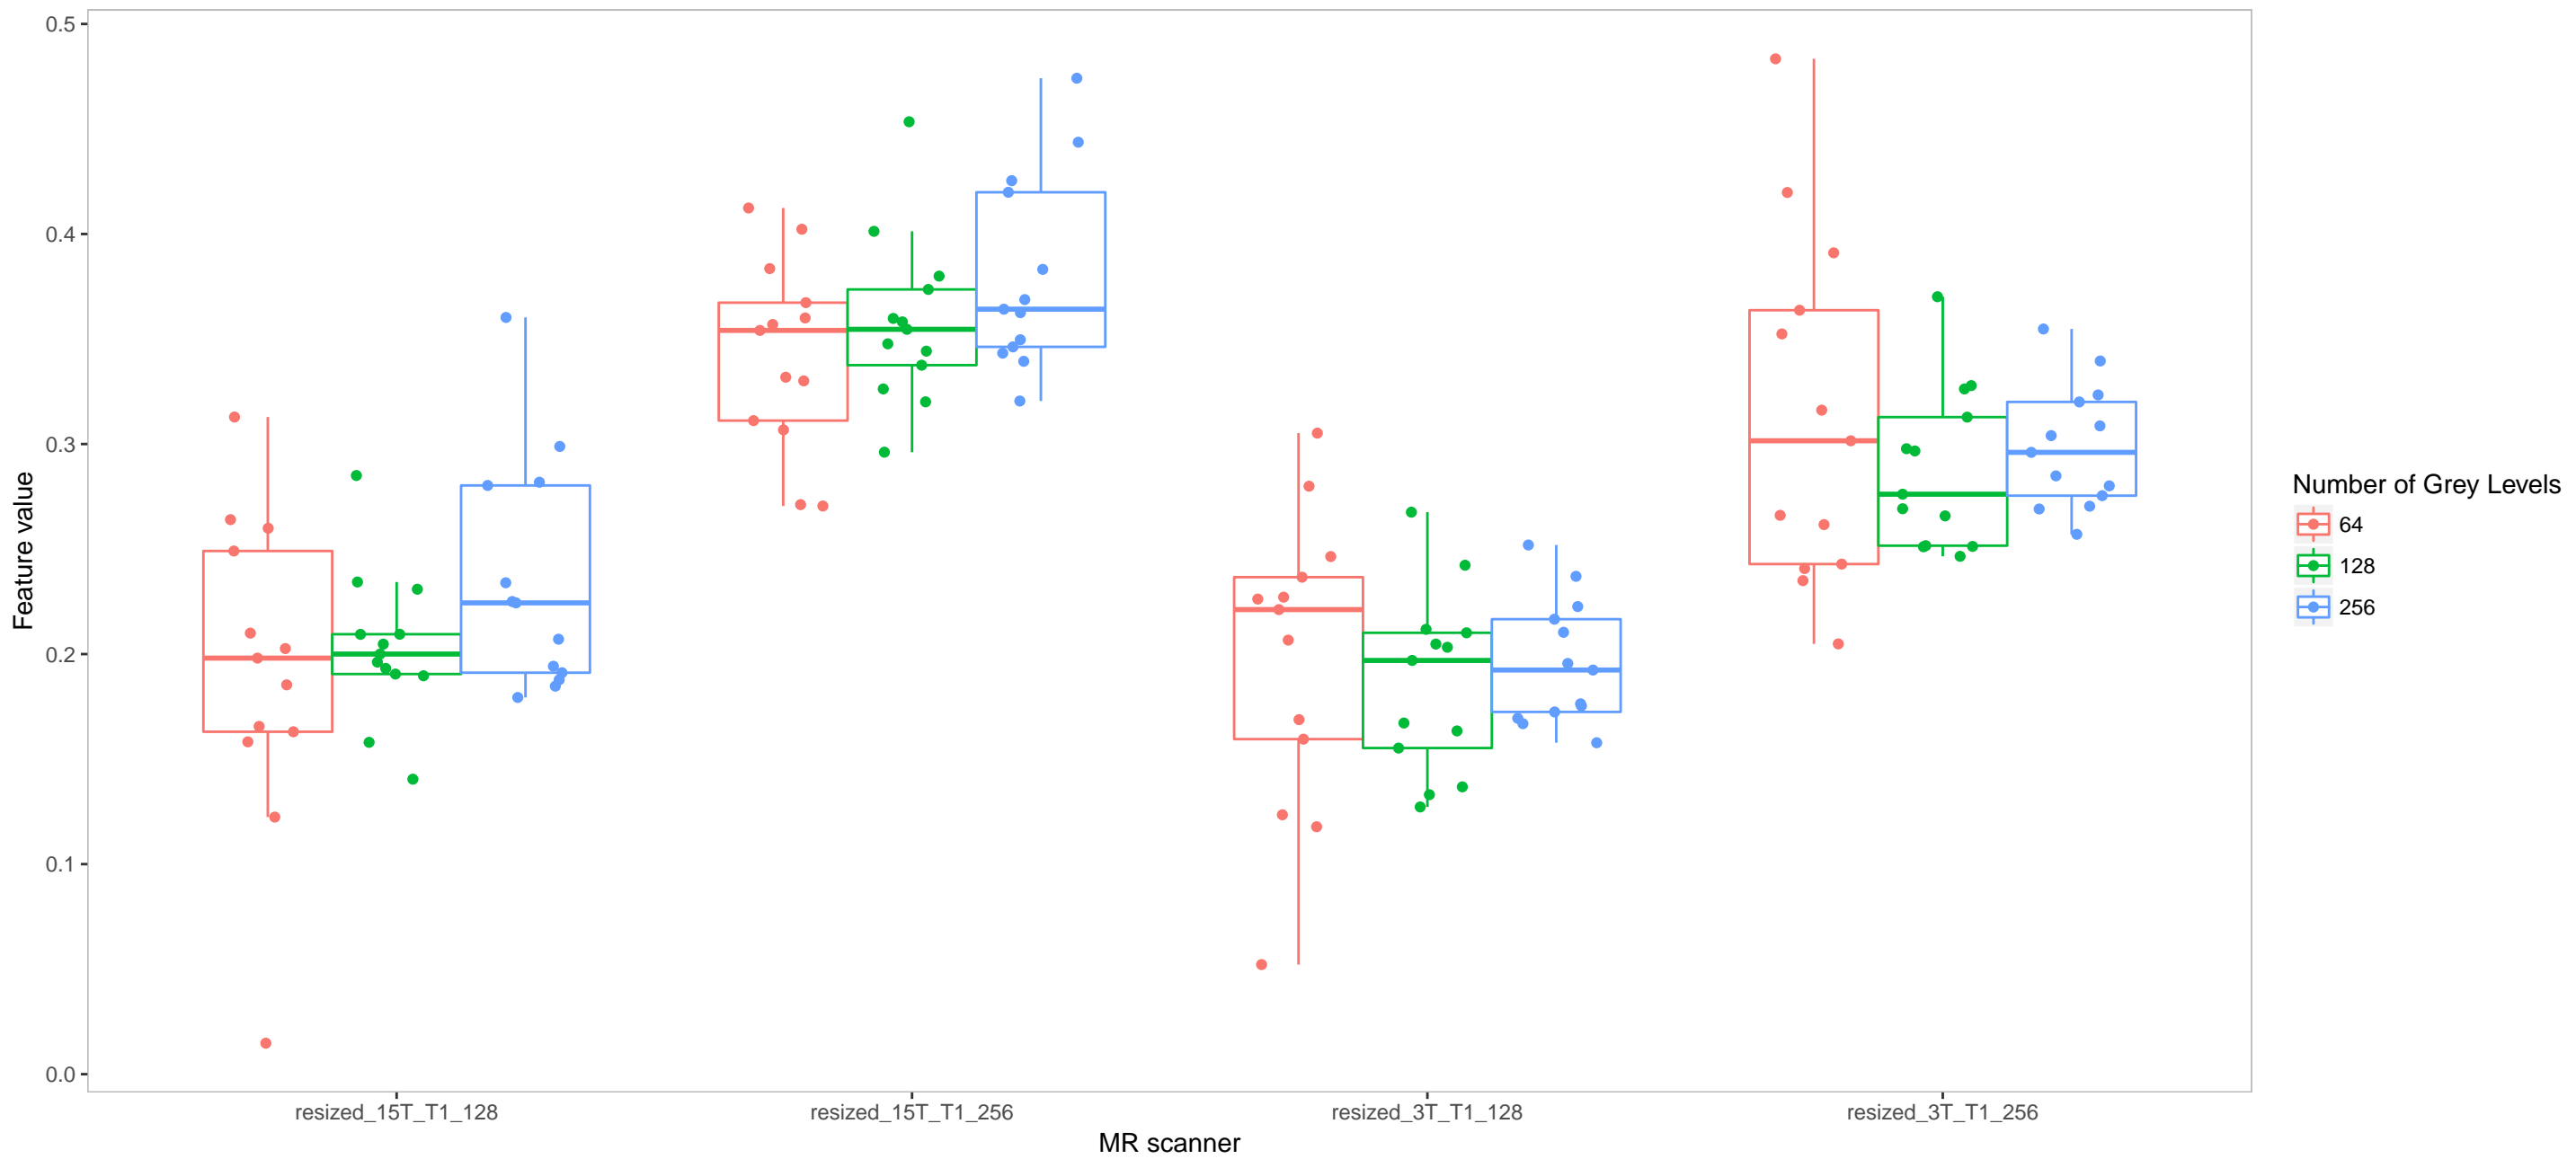

LZE

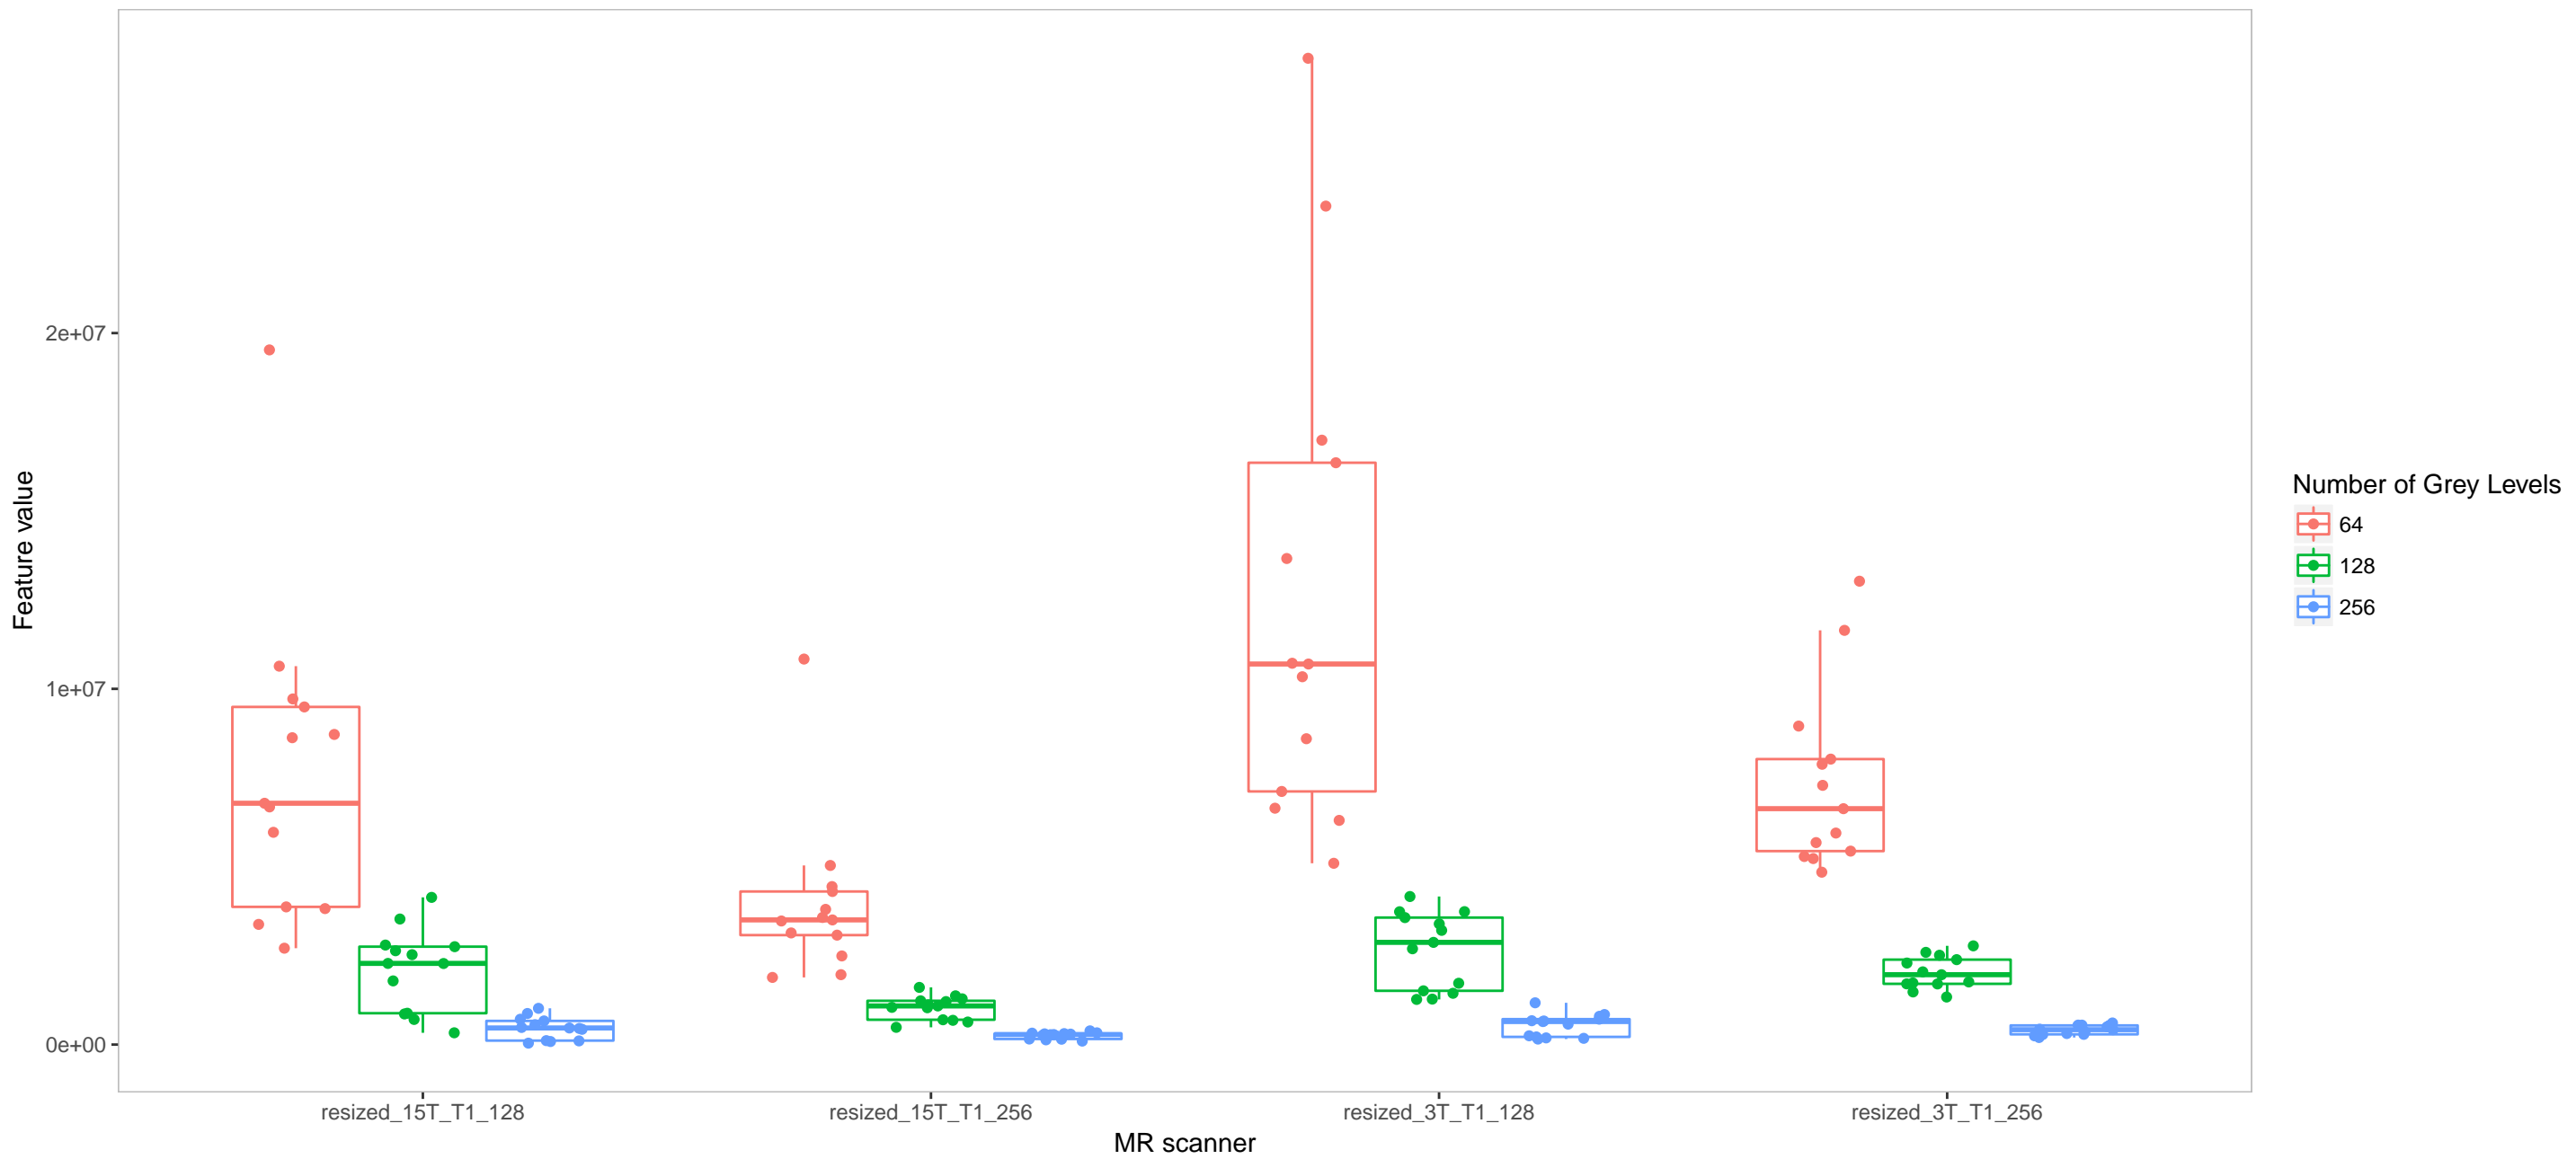

# LGZE

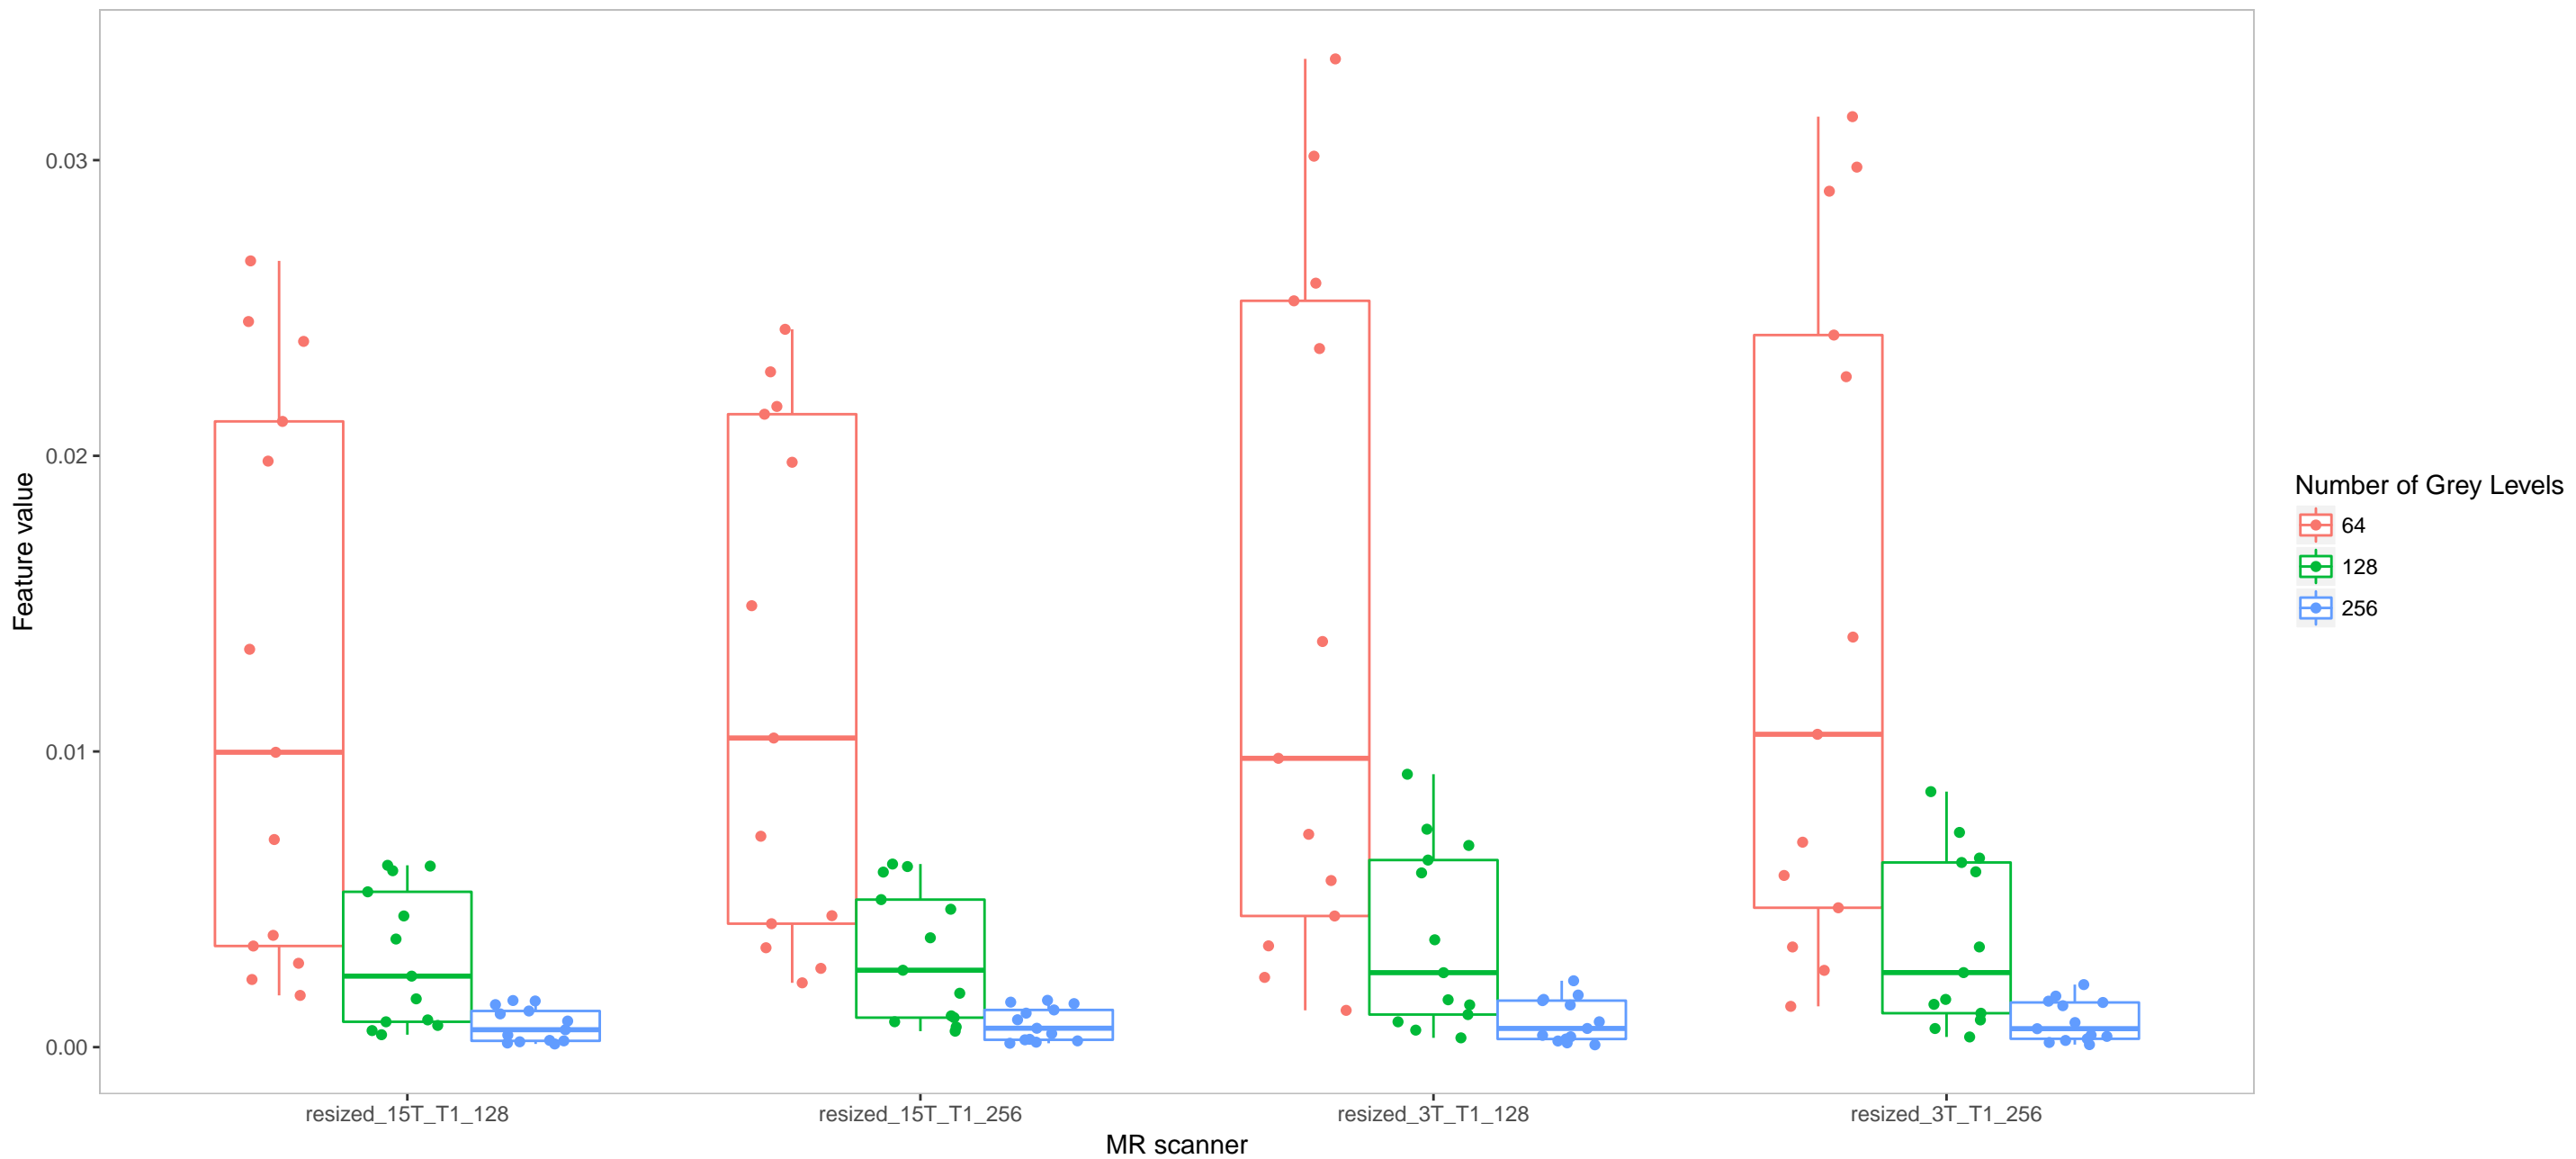

# HGZE

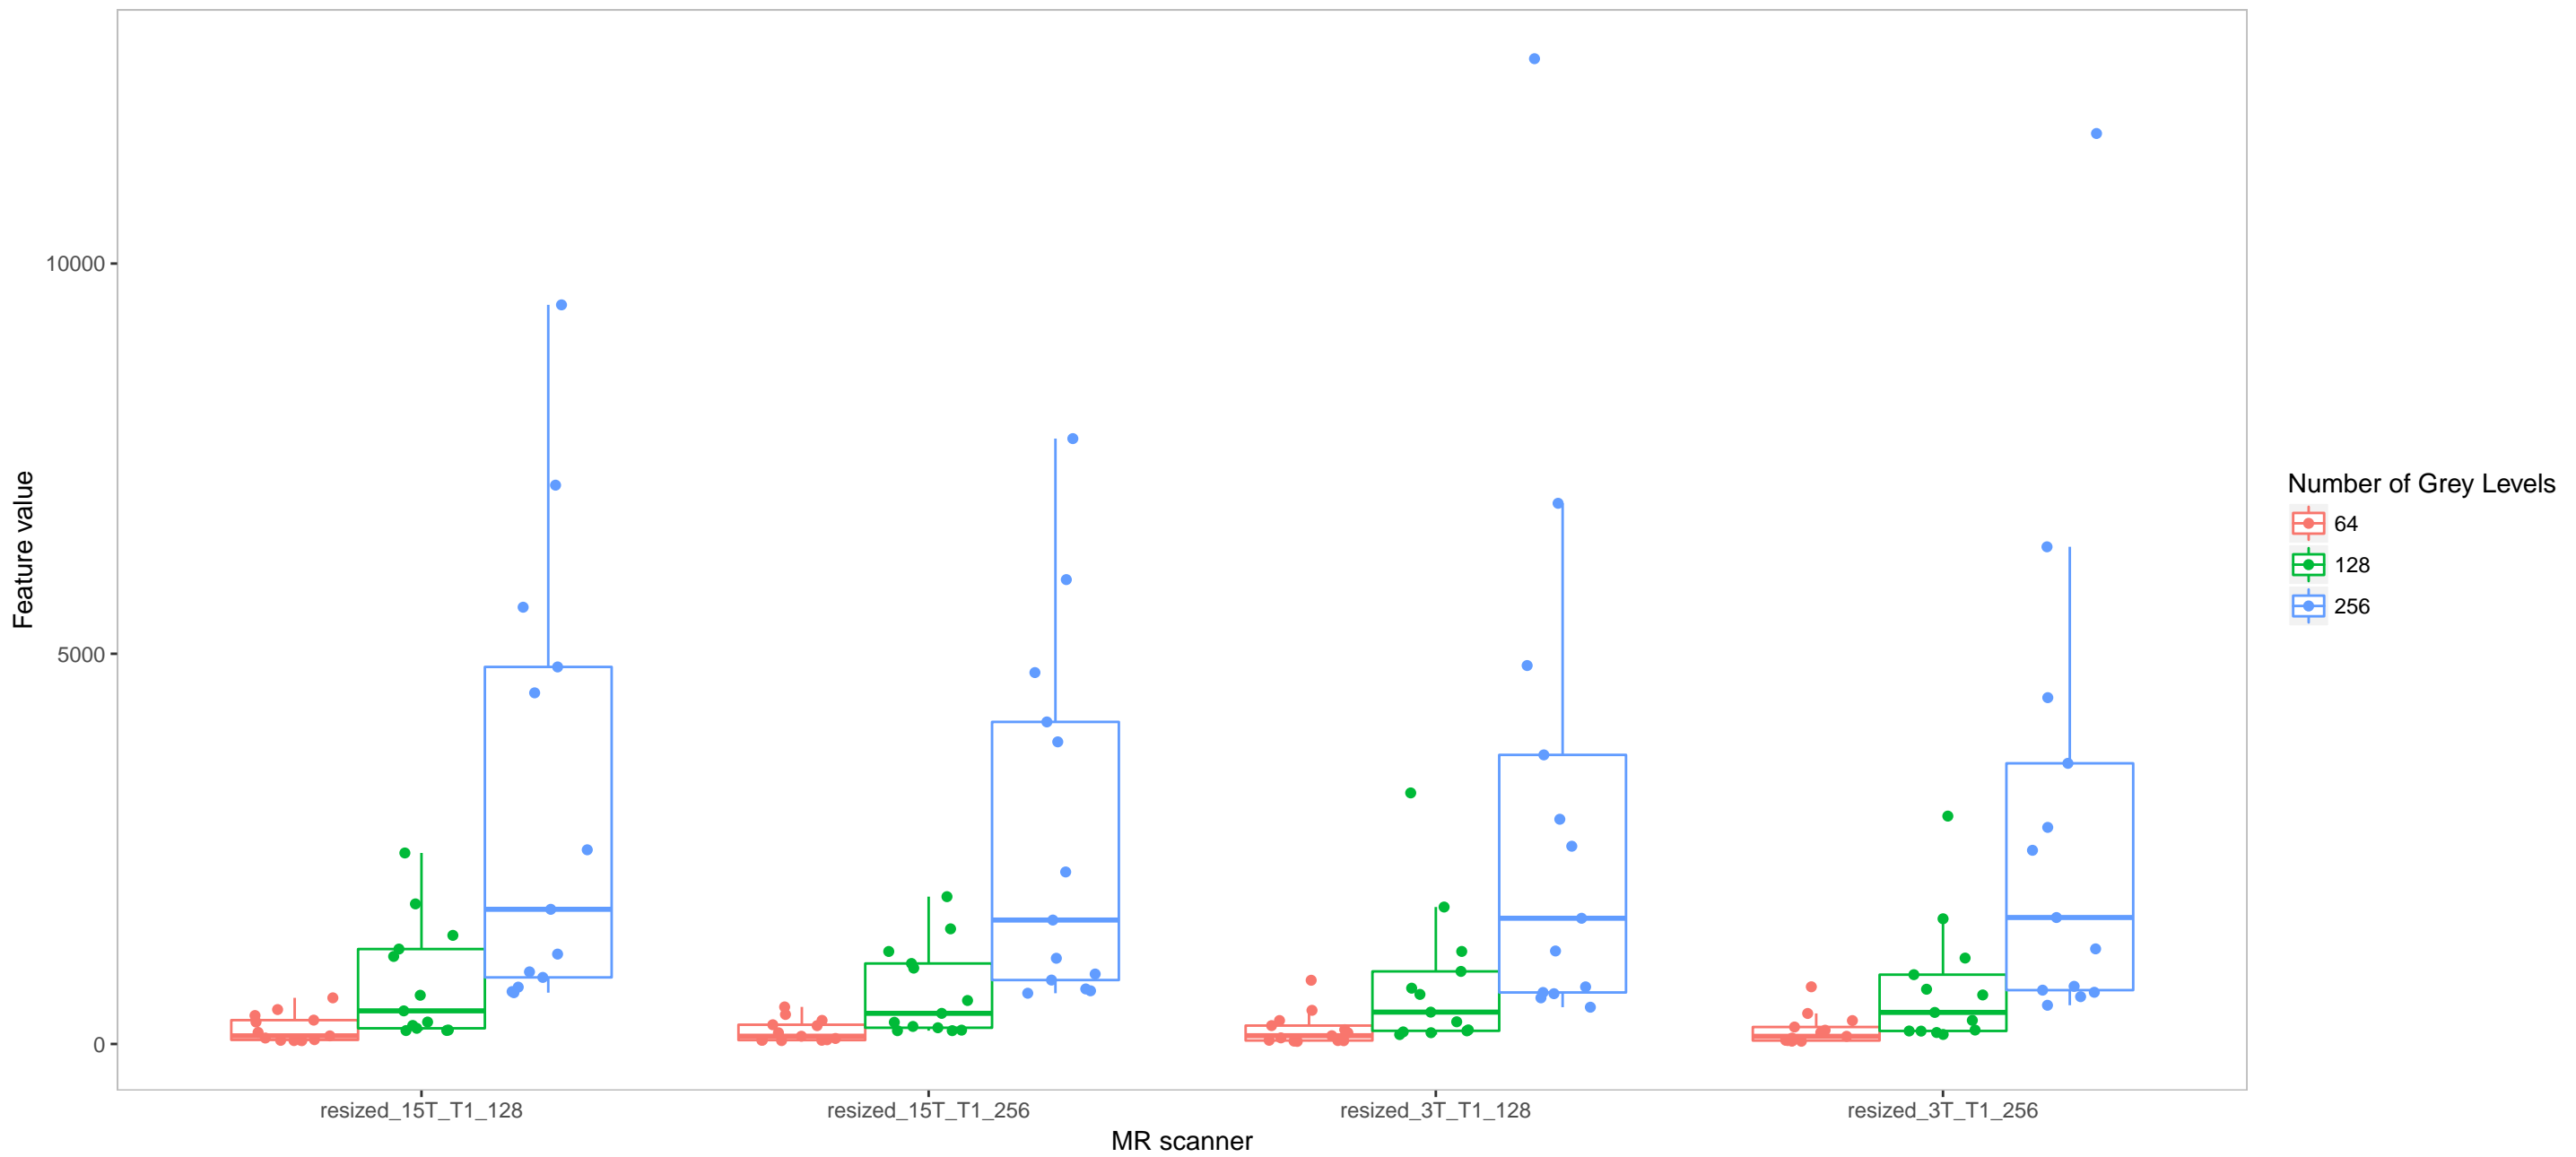

# SZLGE

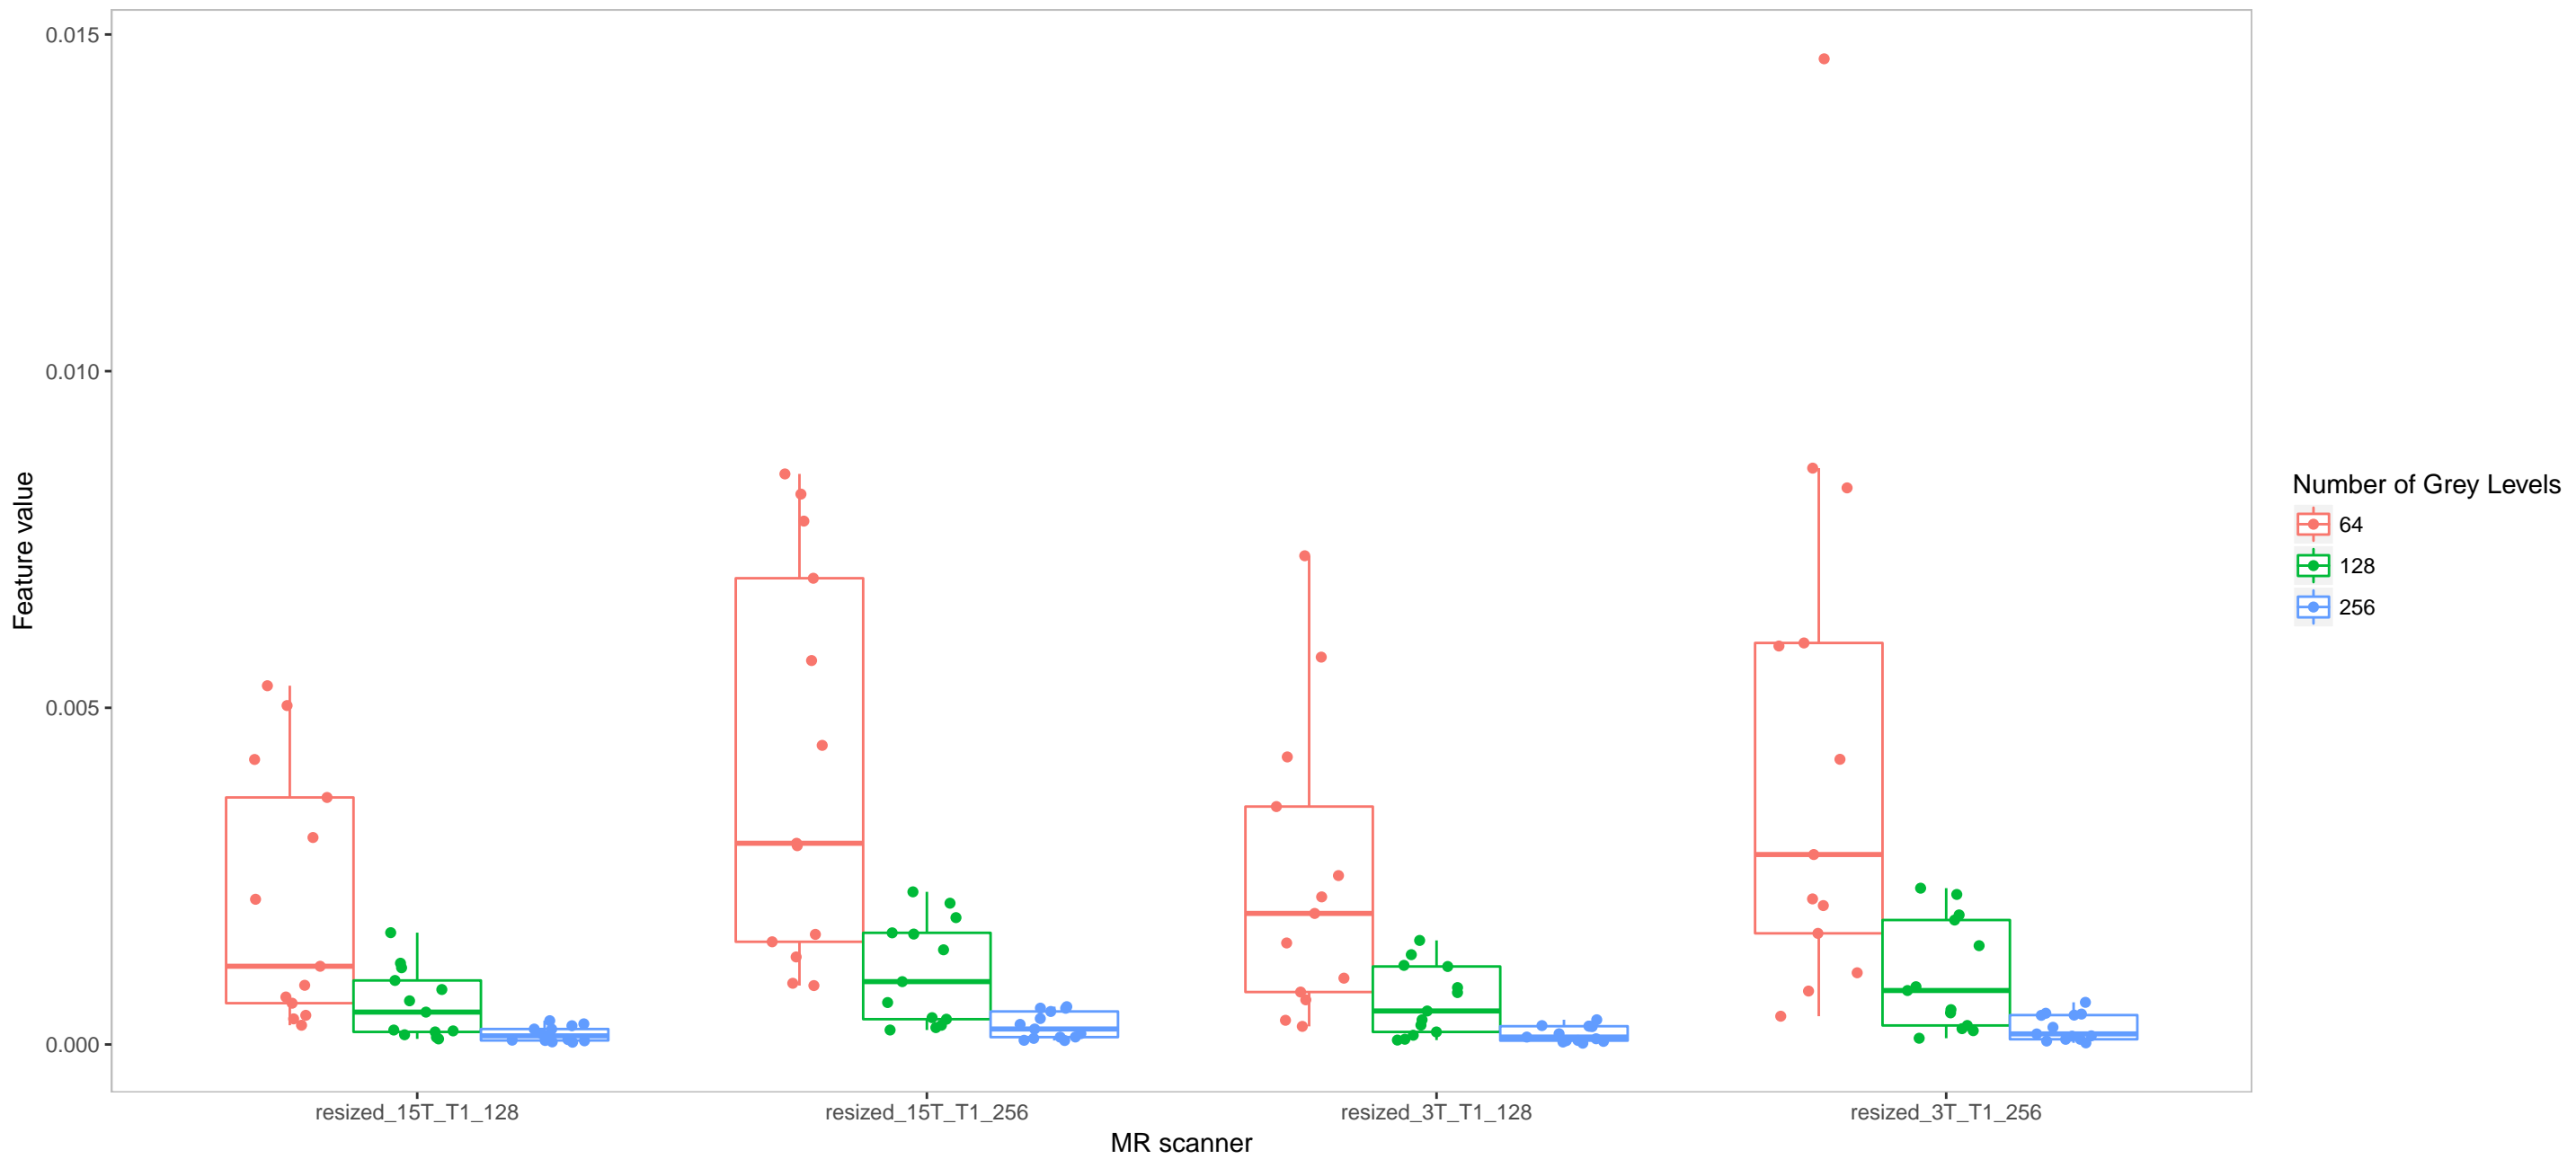



# SZHGE

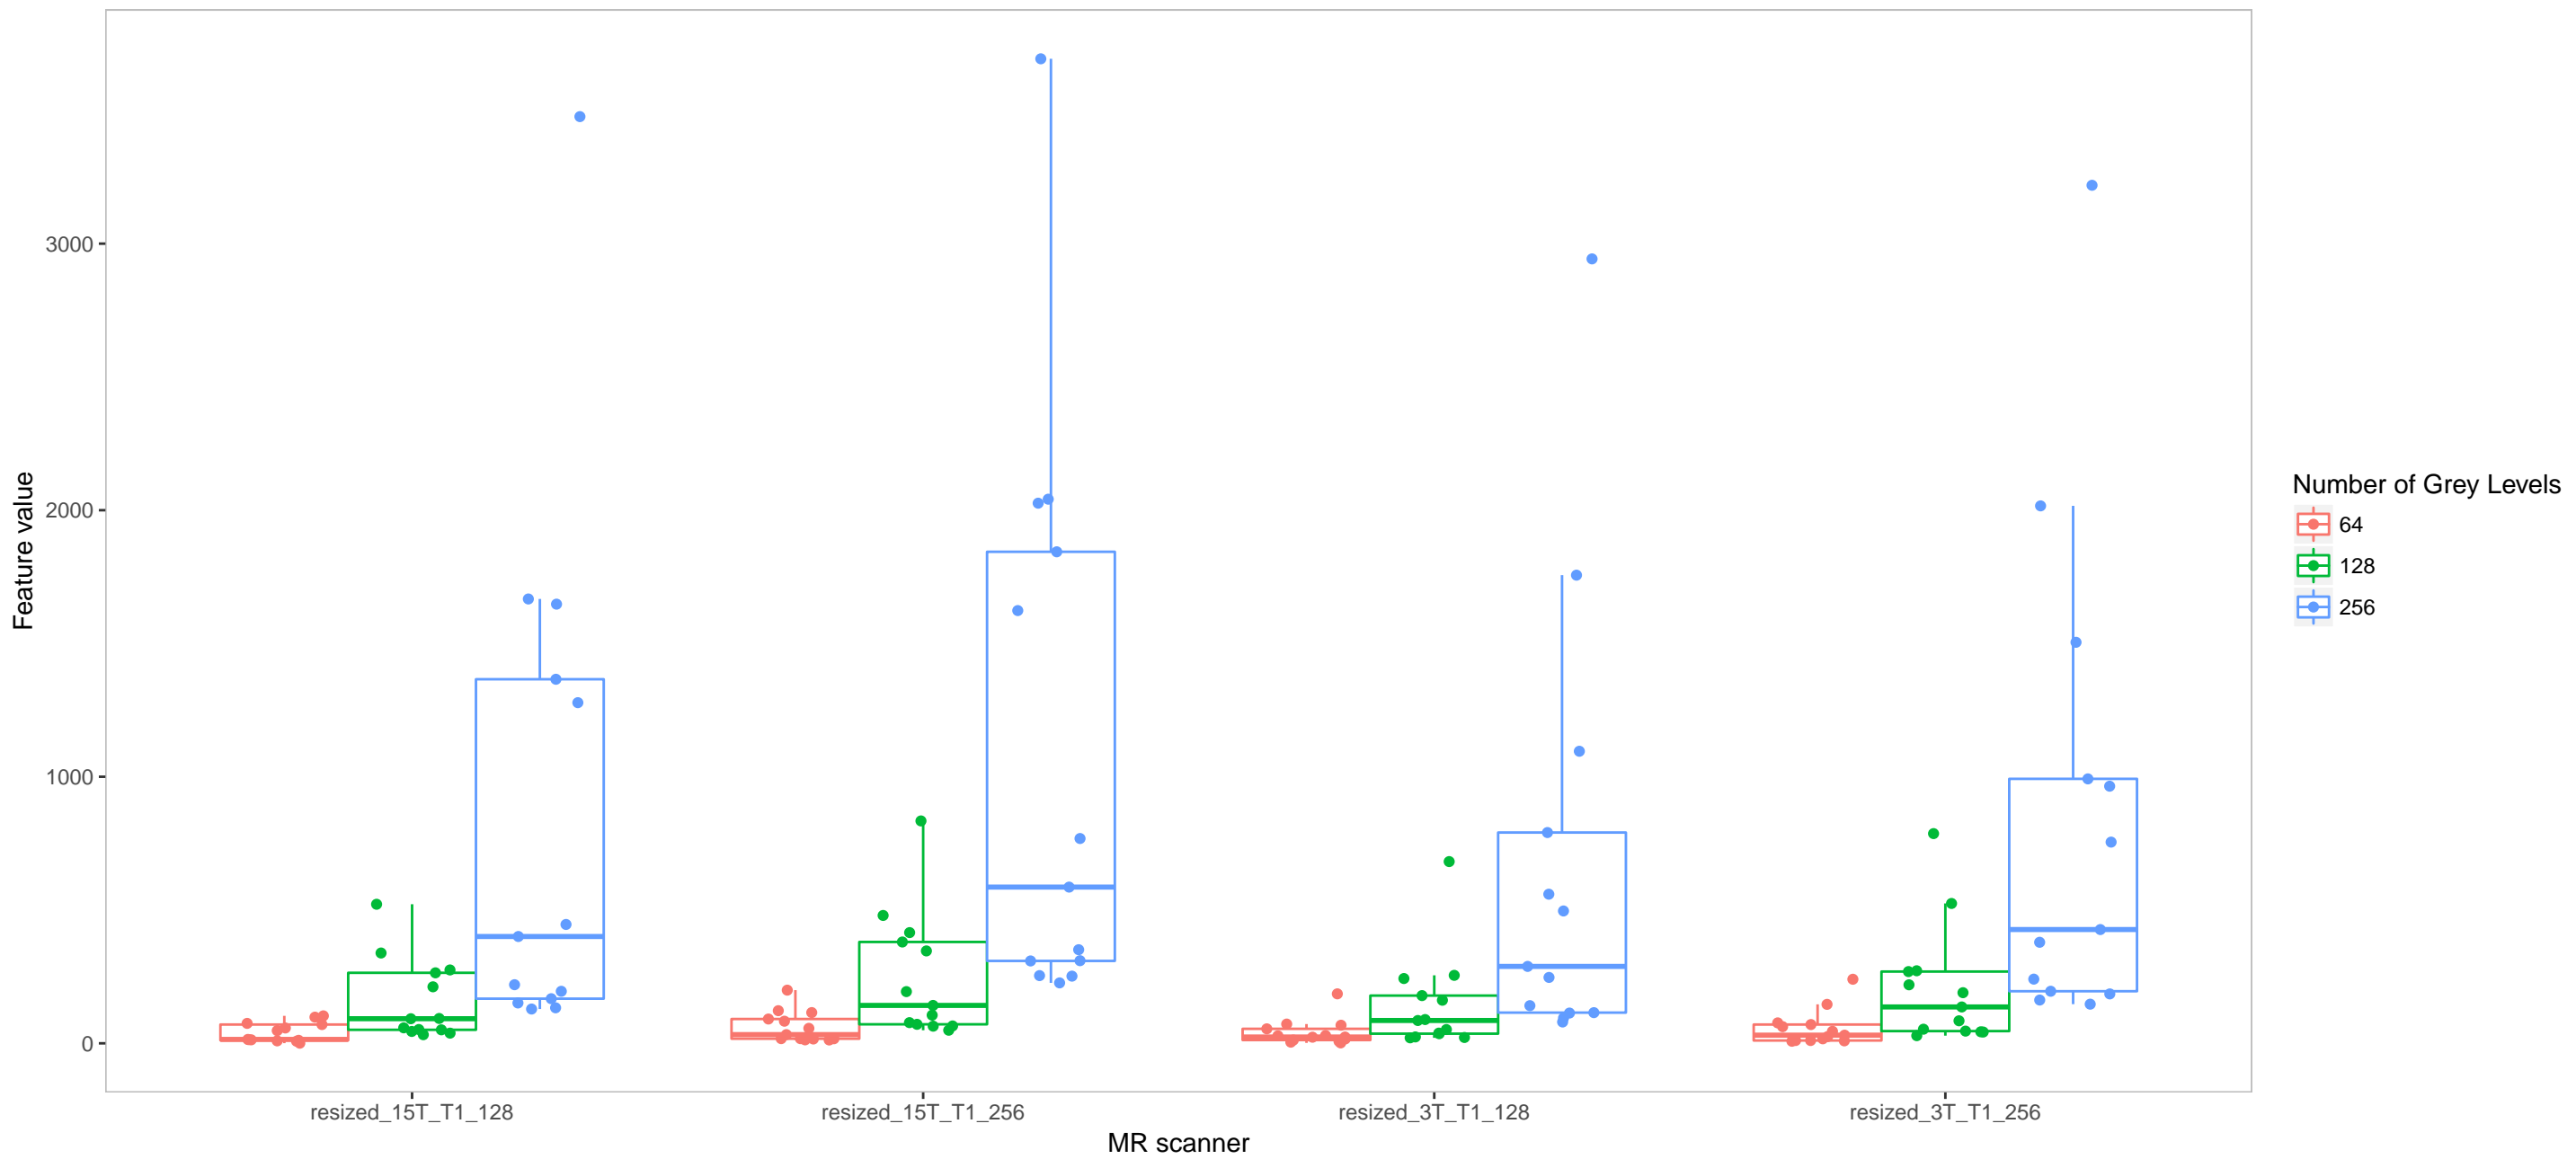

# LZLGE

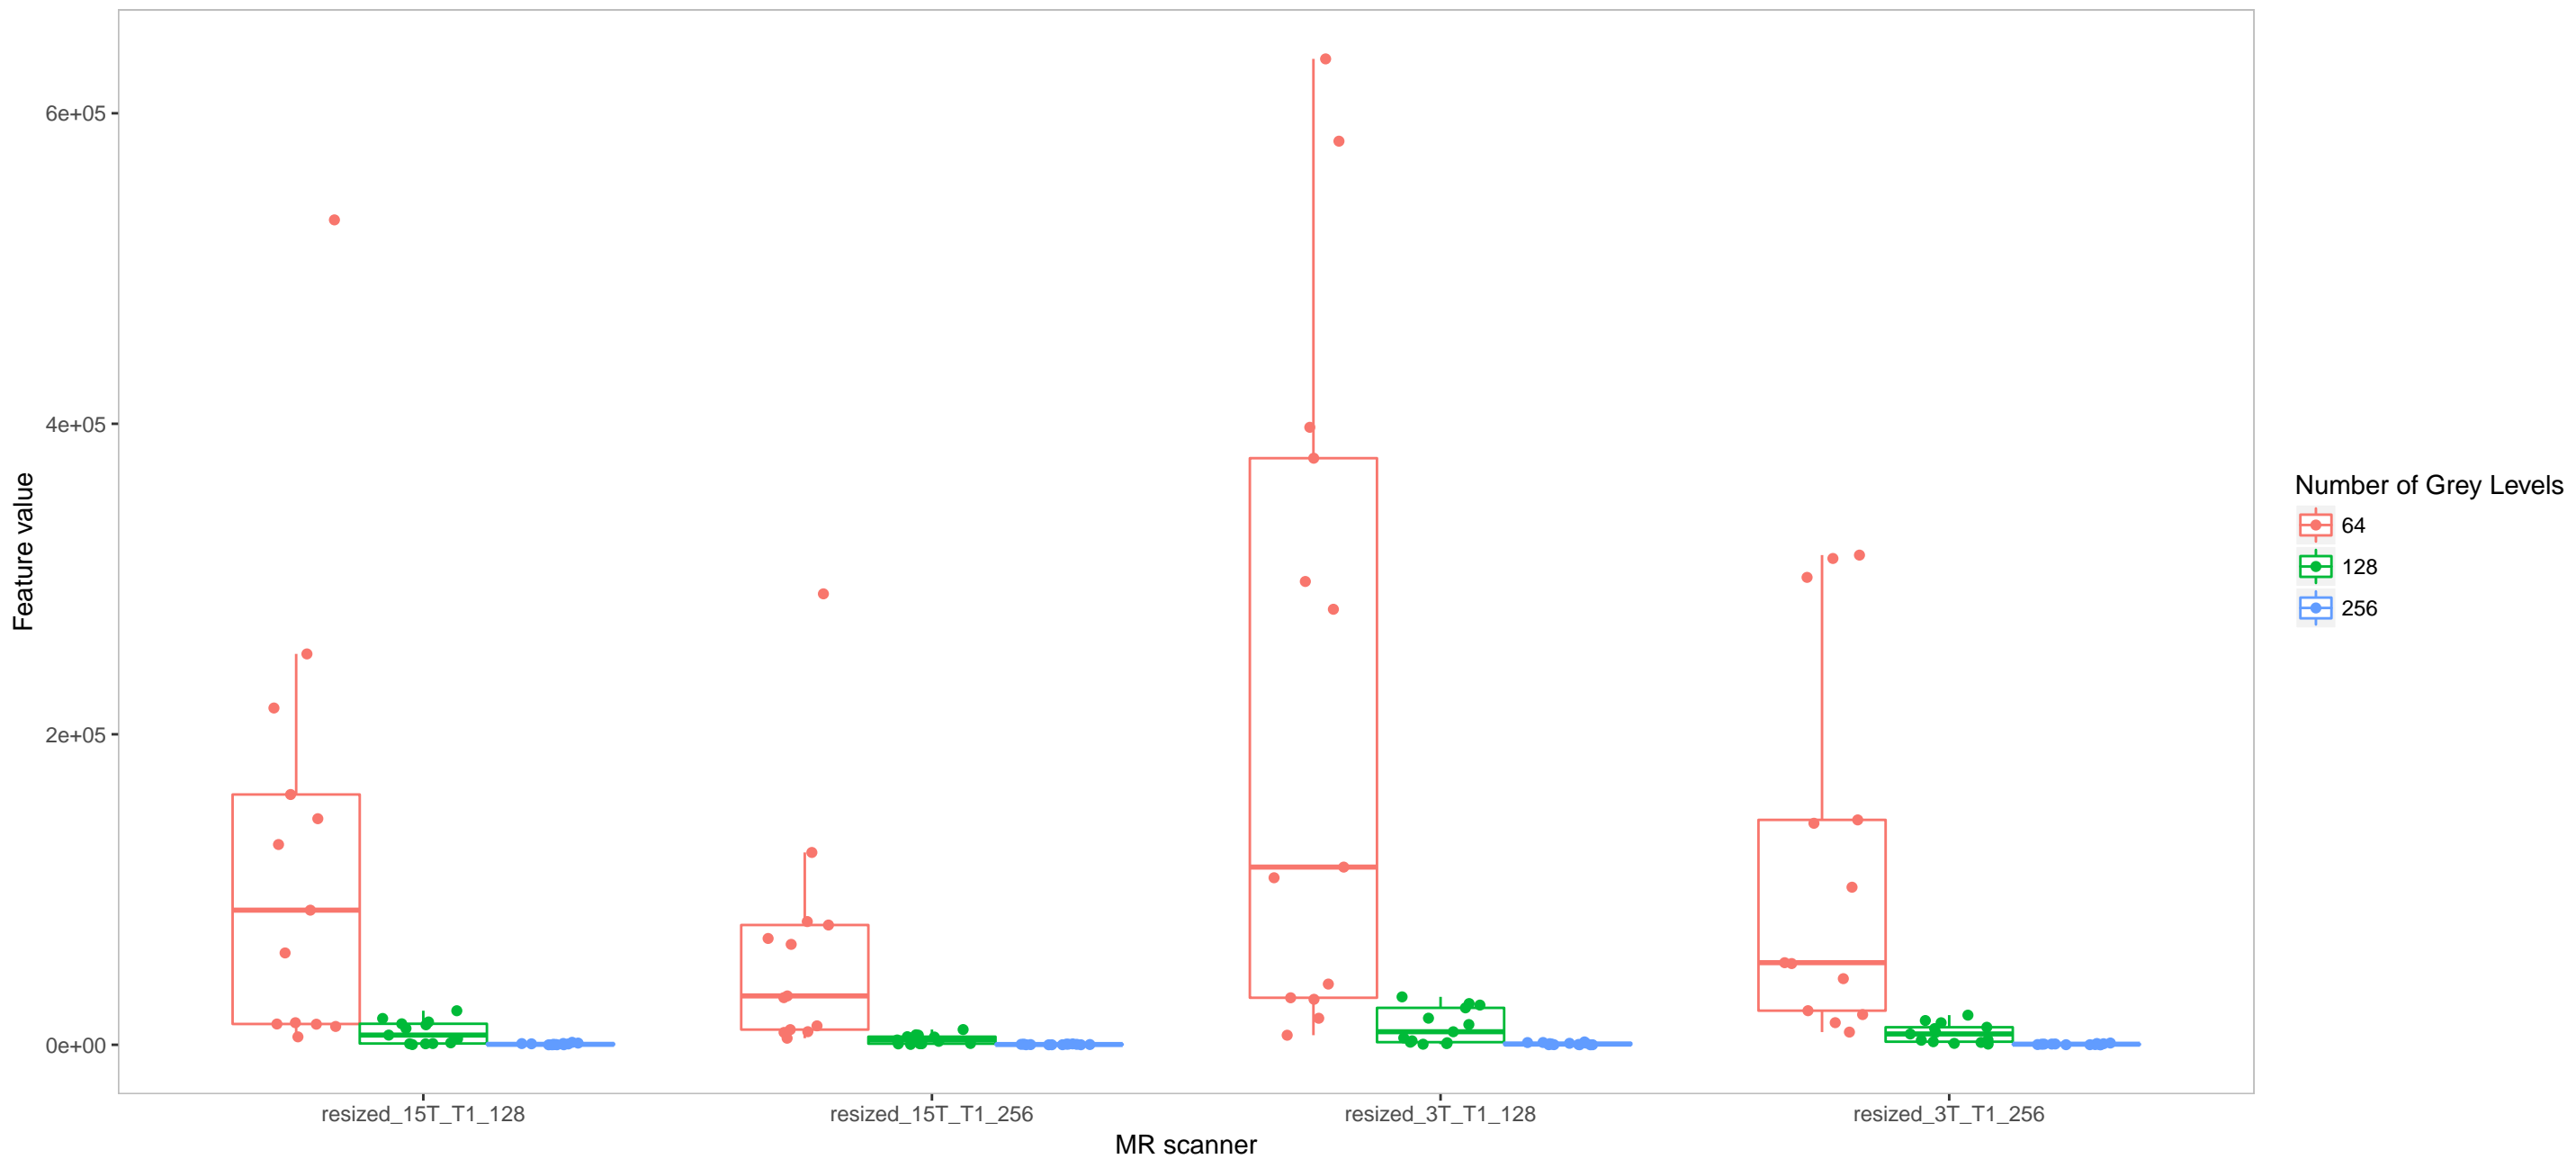

# LZHGE

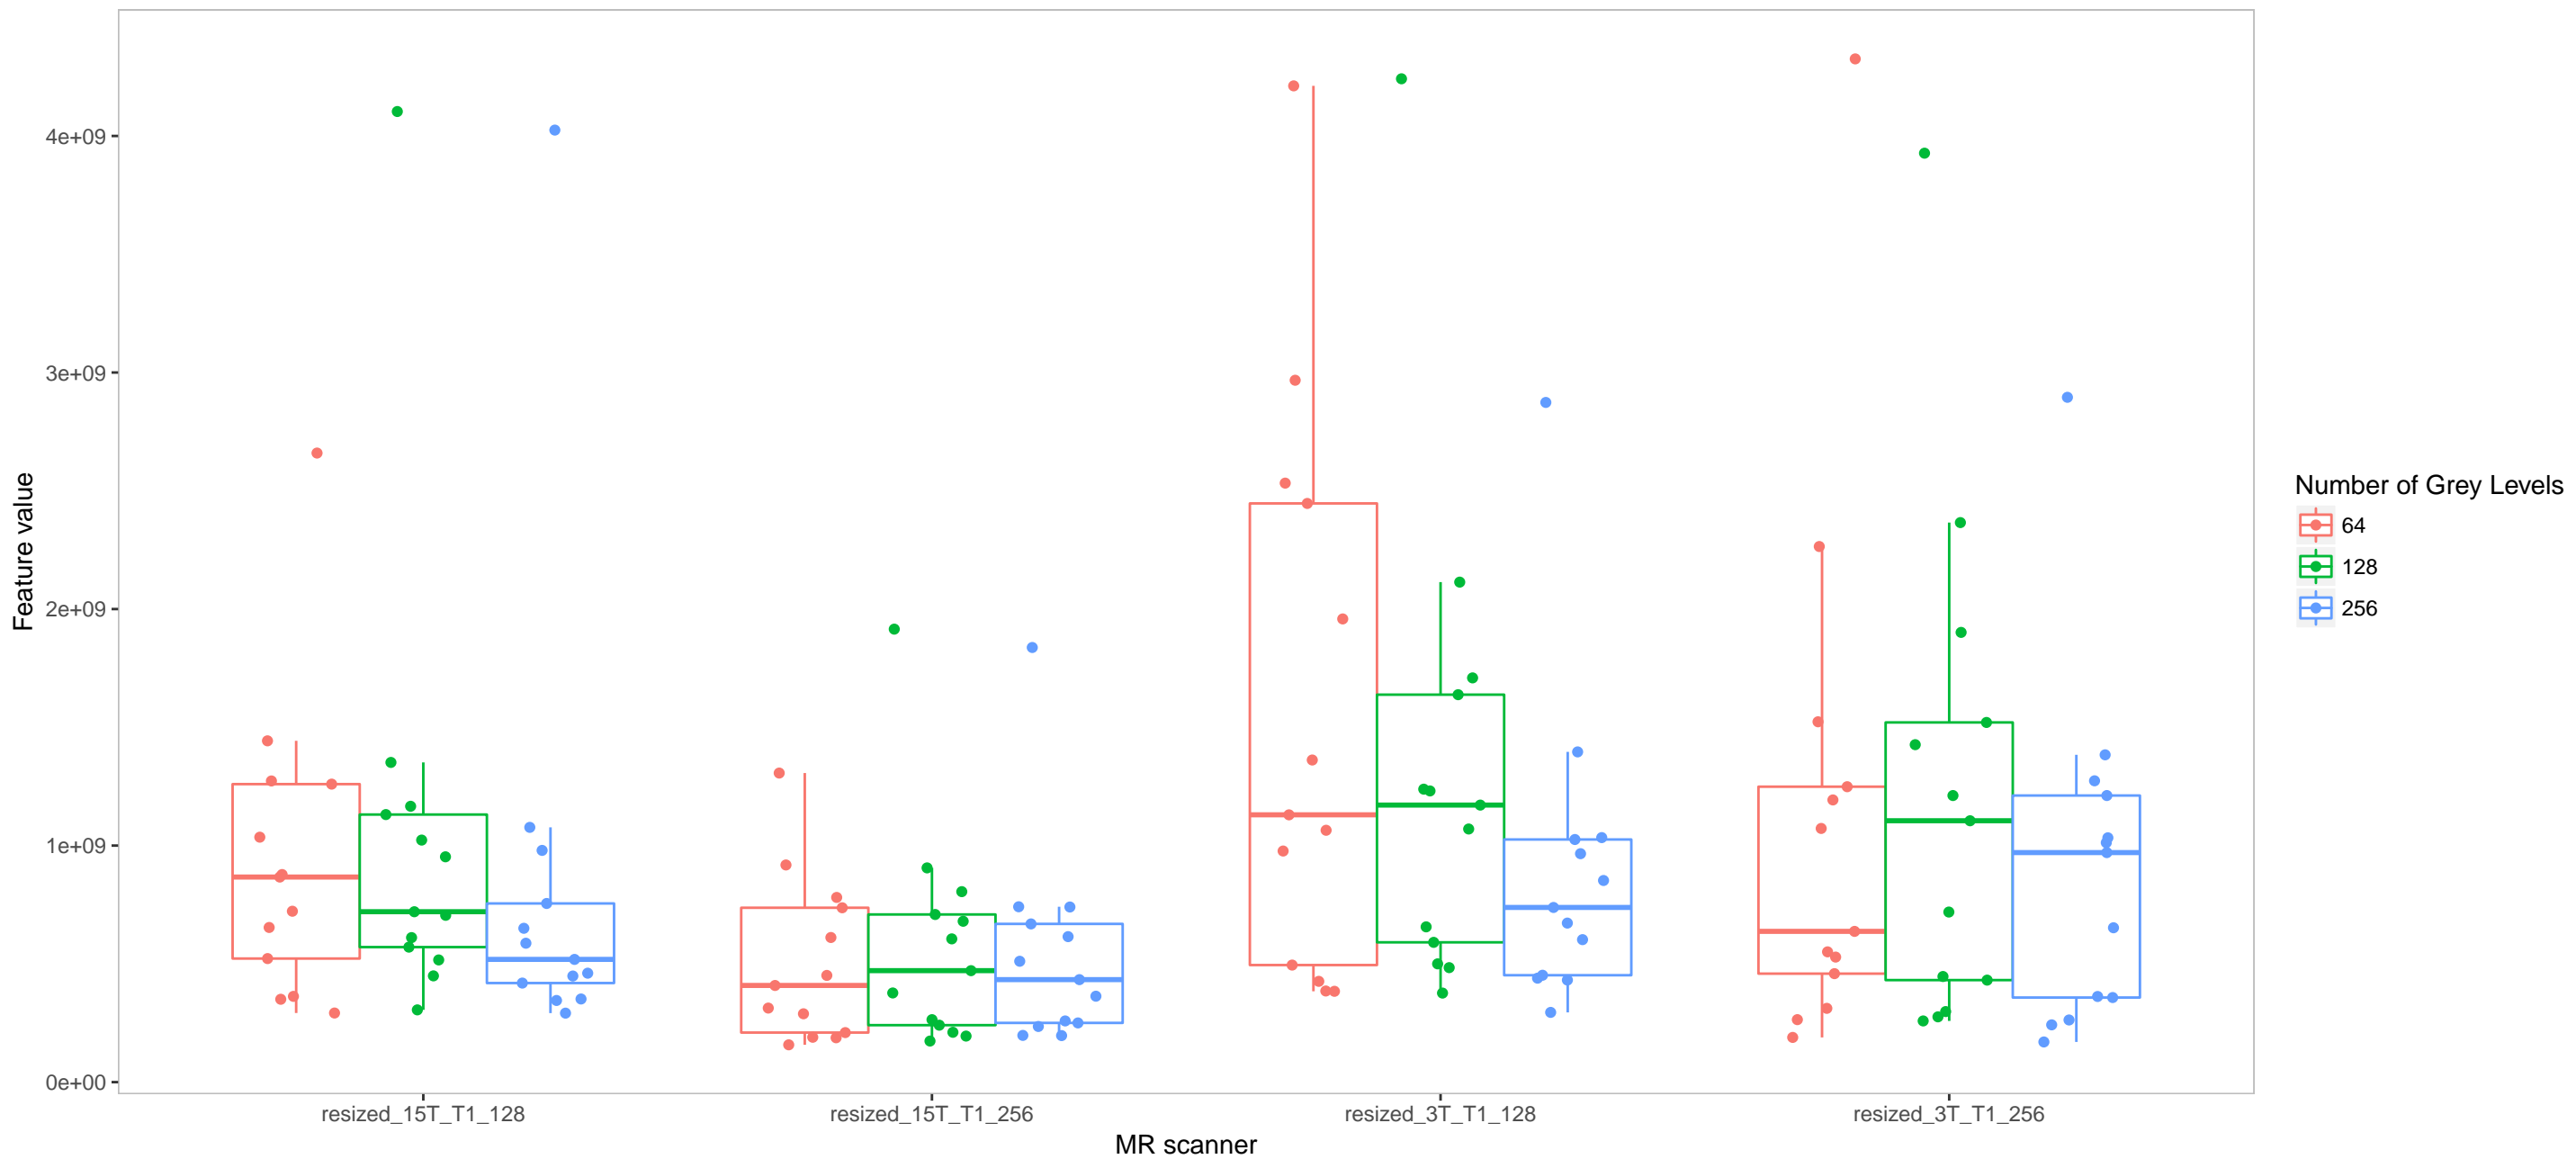

GLNU\_1

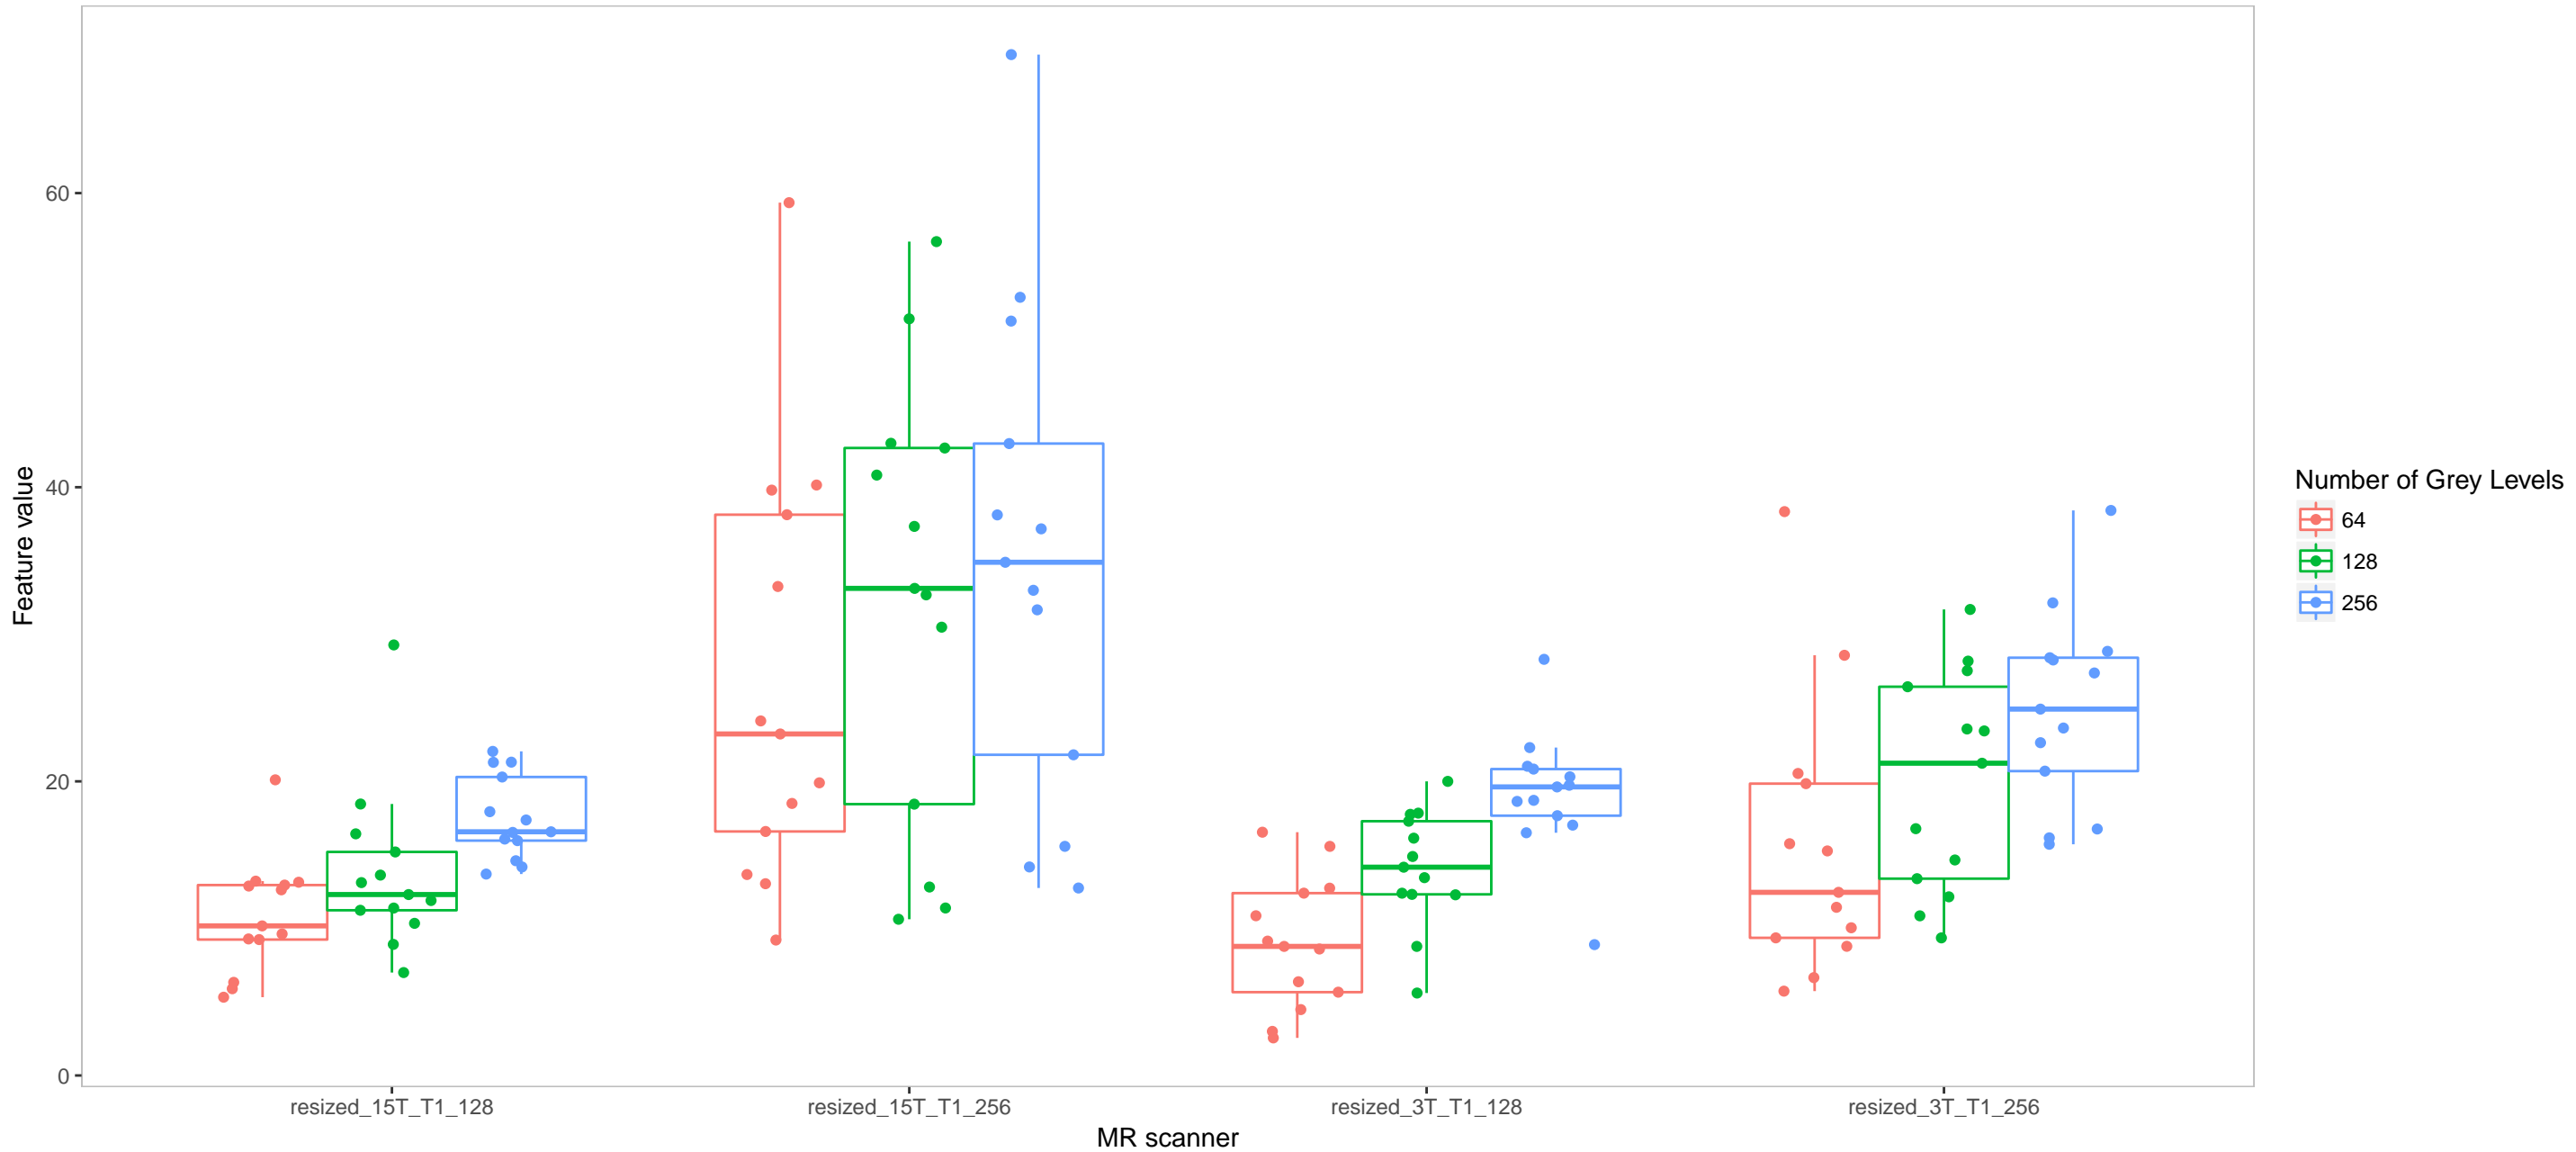

ZLNU

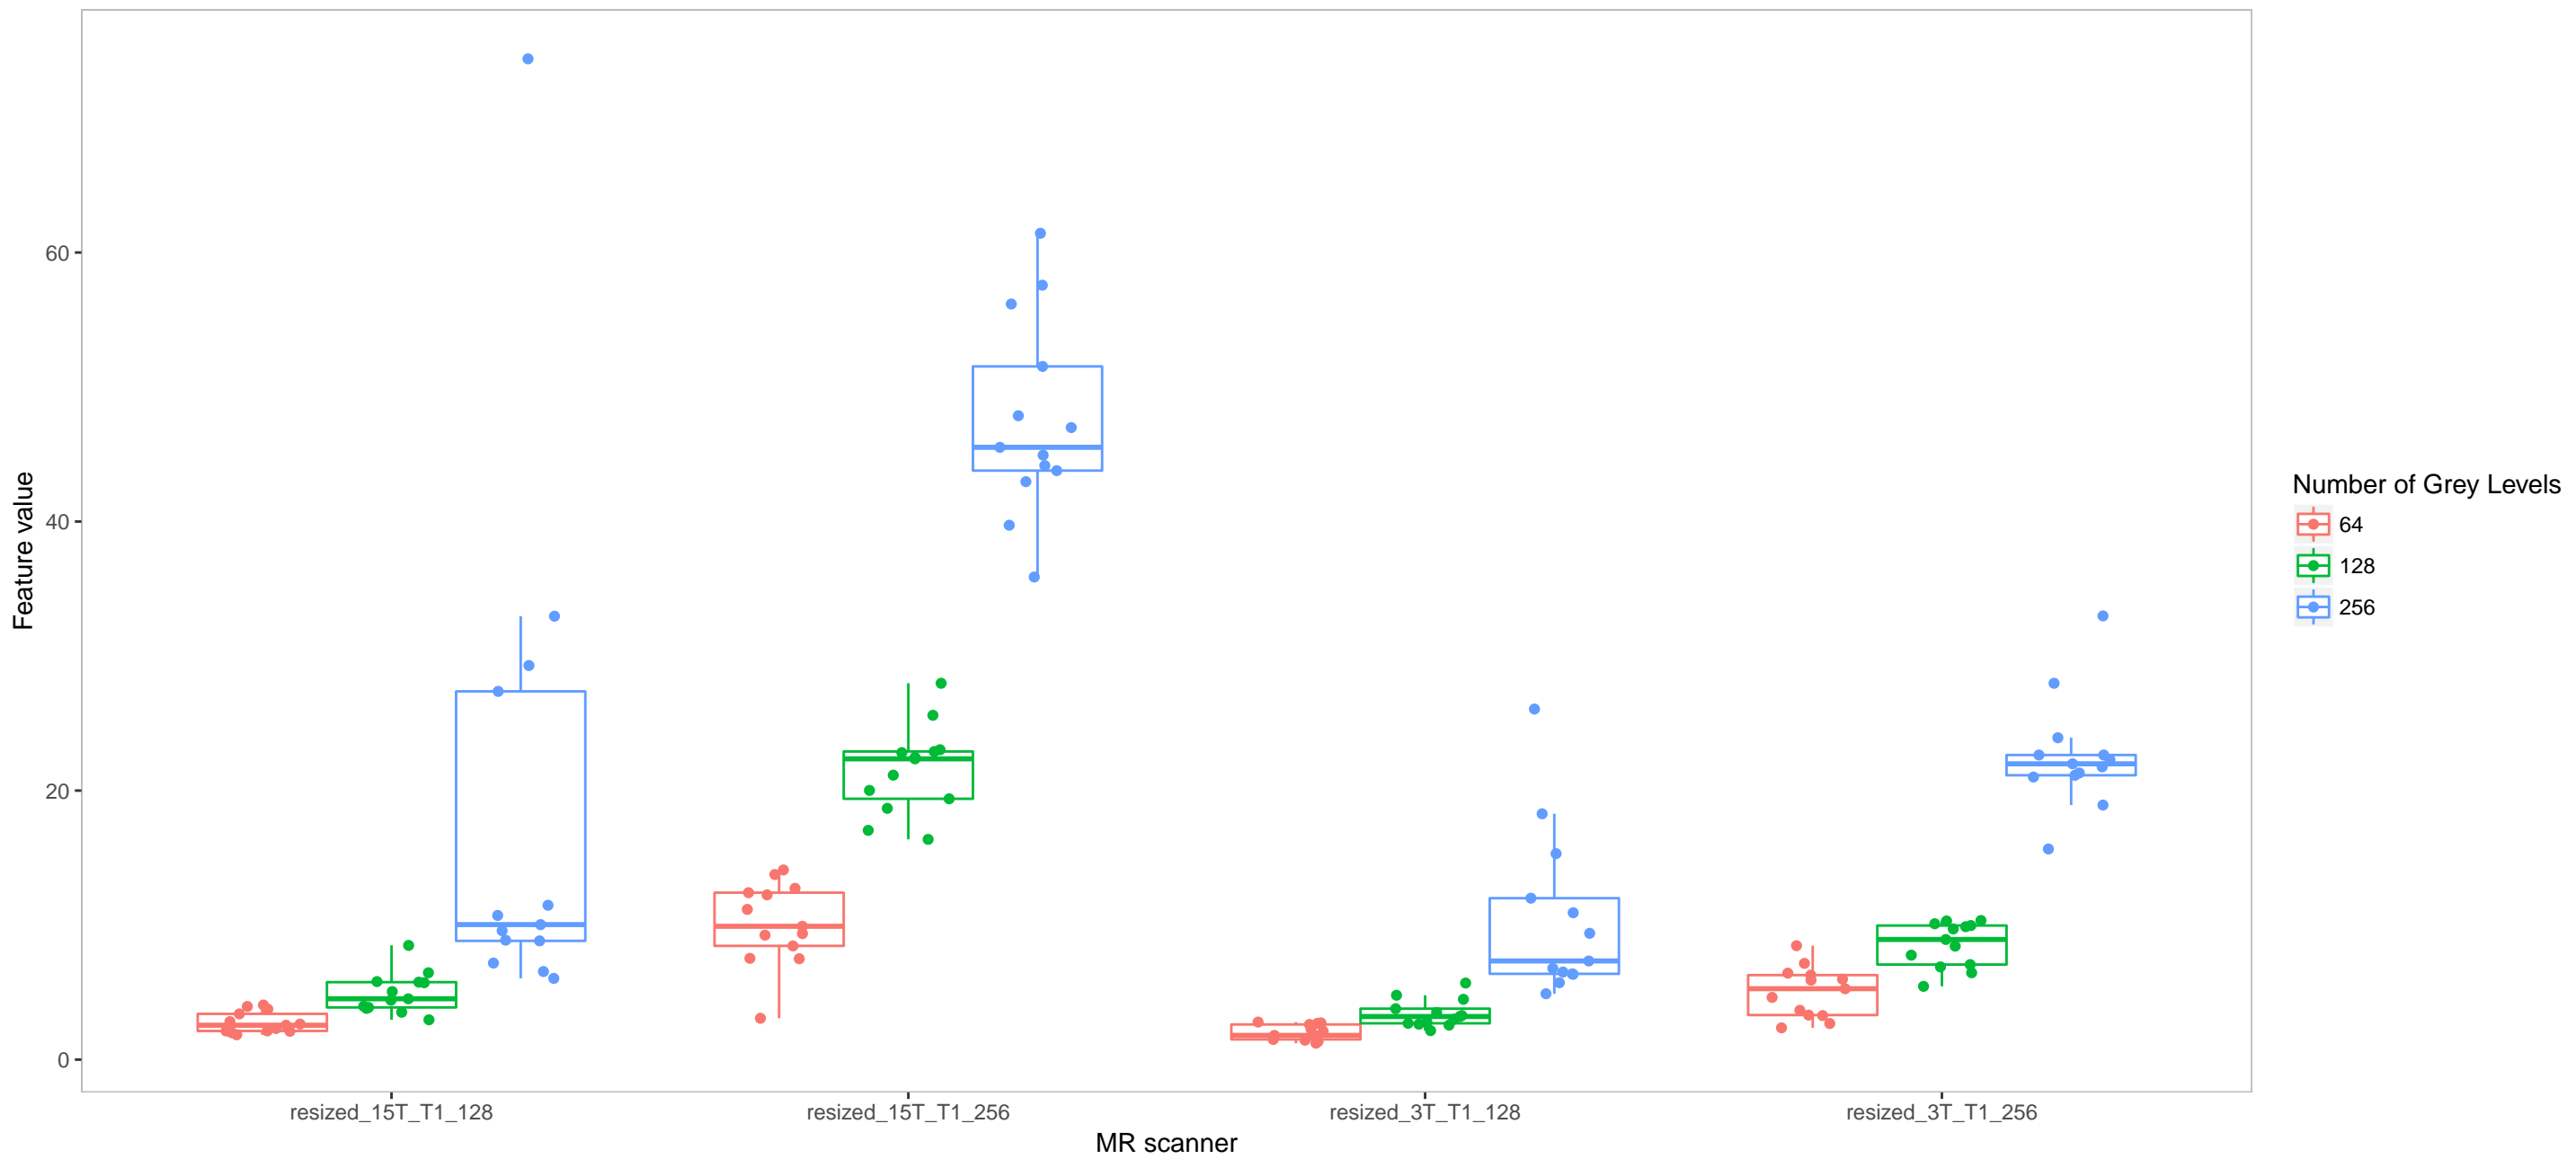

ZP

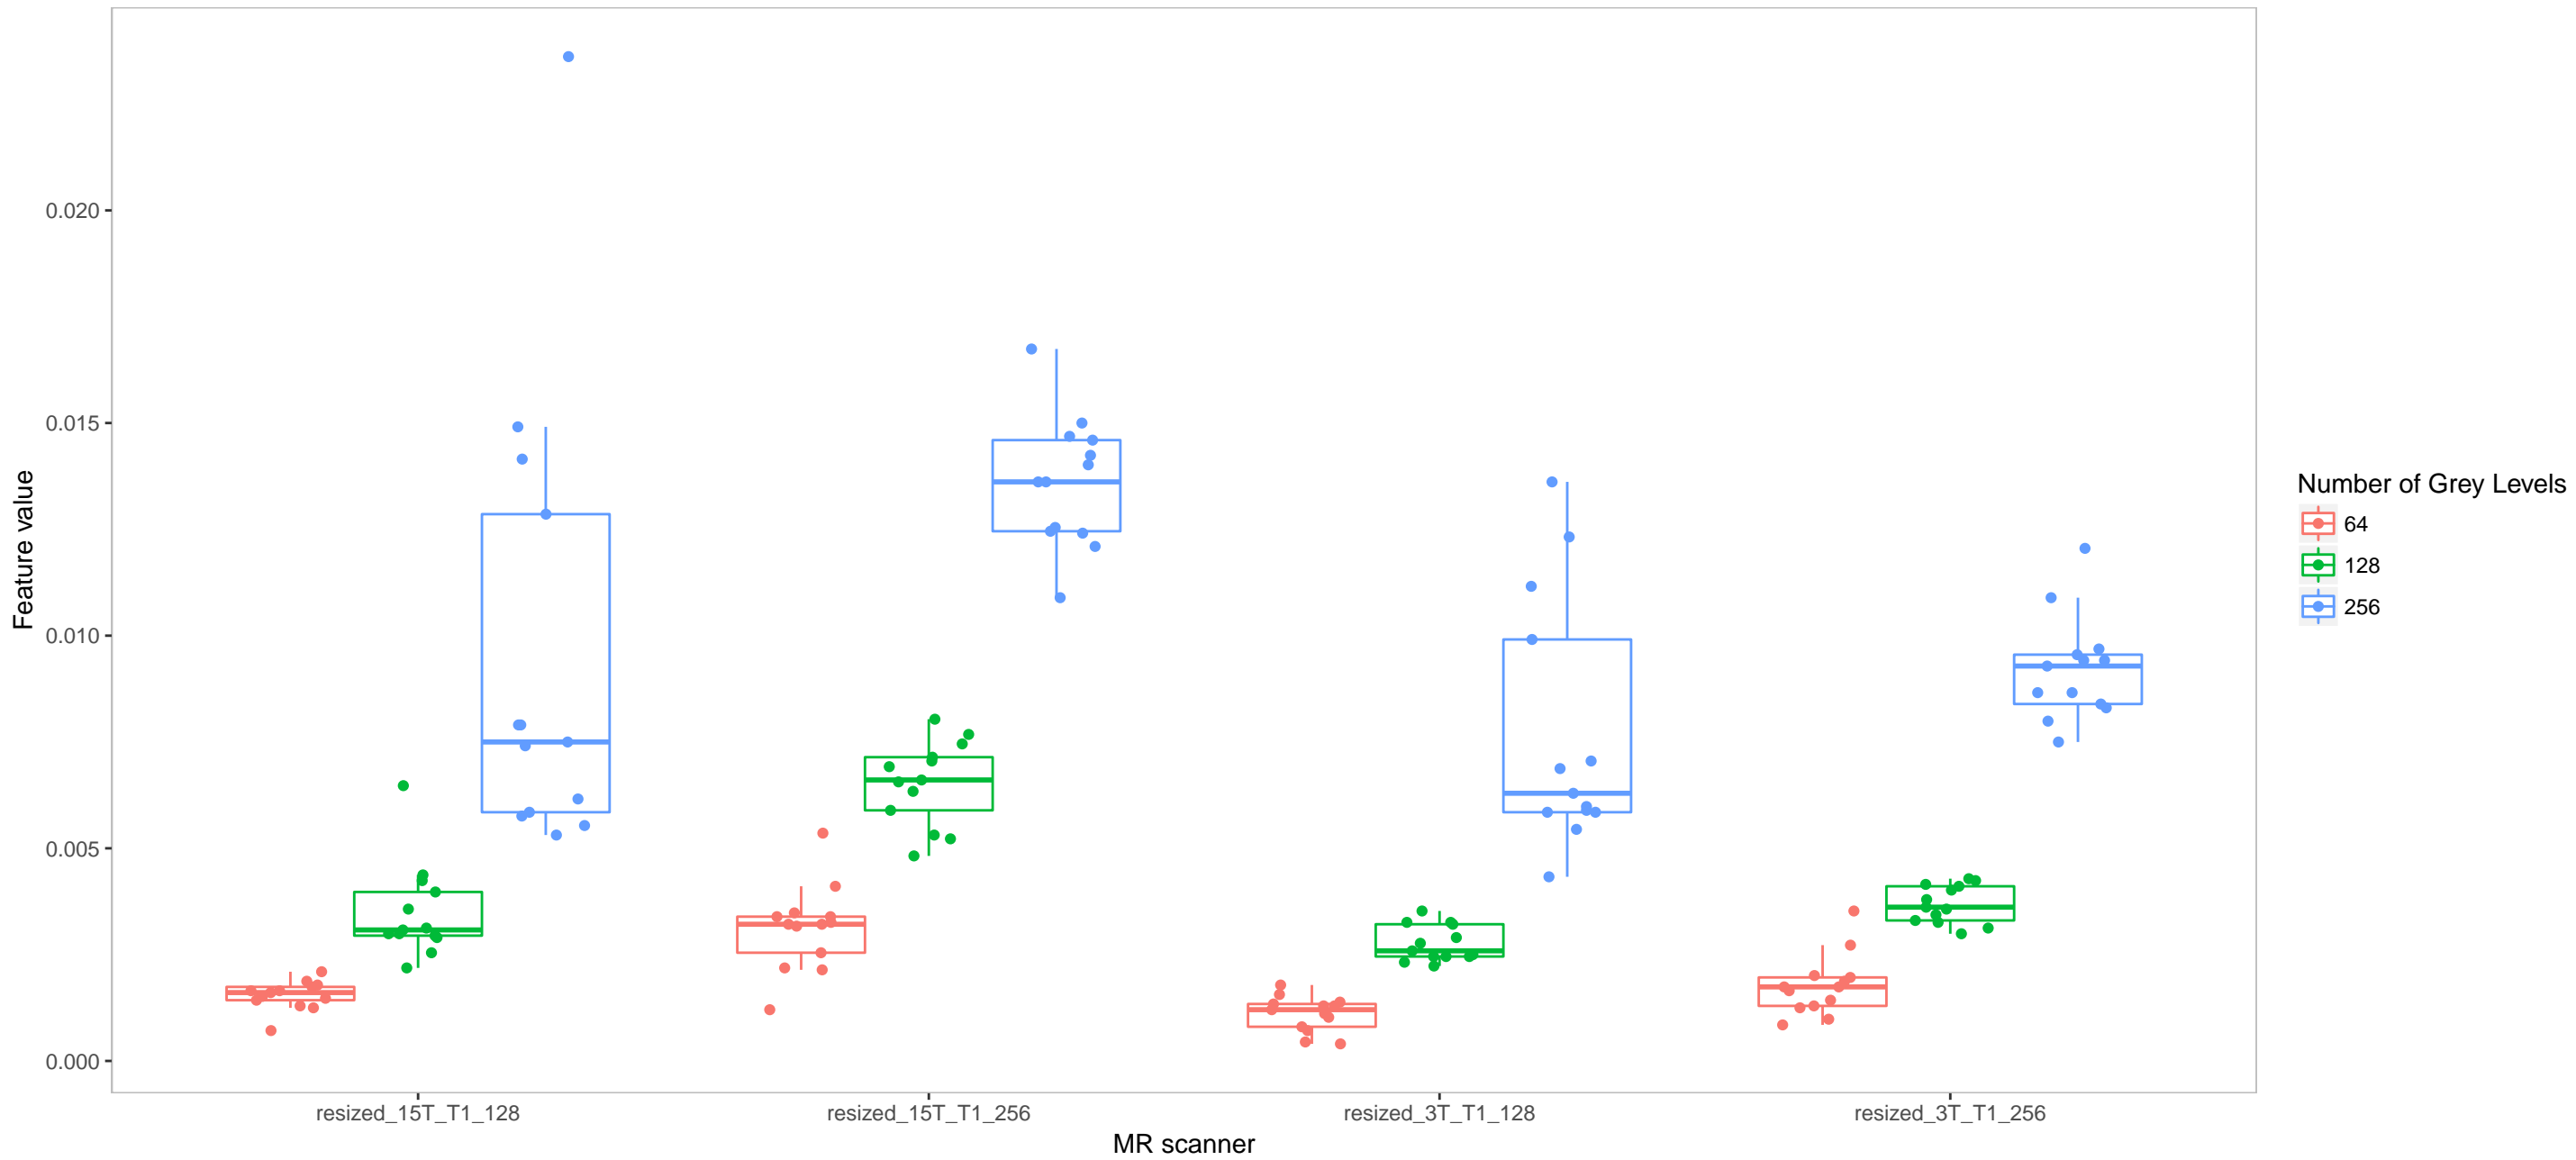

Supplement: DataSheet_2.pdf [file DataSheet_2.pdf]
