# Supplementary material for: Influence of Magnetic Field Strength on Magnetic Resonance Imaging Radiomics Features in Brain Imaging, an In Vitro and In Vivo Study
Source: PubMed Central journal article supplement (PMC7855708; doi:10.3389/fonc.2020.541663), 2021-01-20

# Relative discretization – Hierarchical clustering

64 gray levels

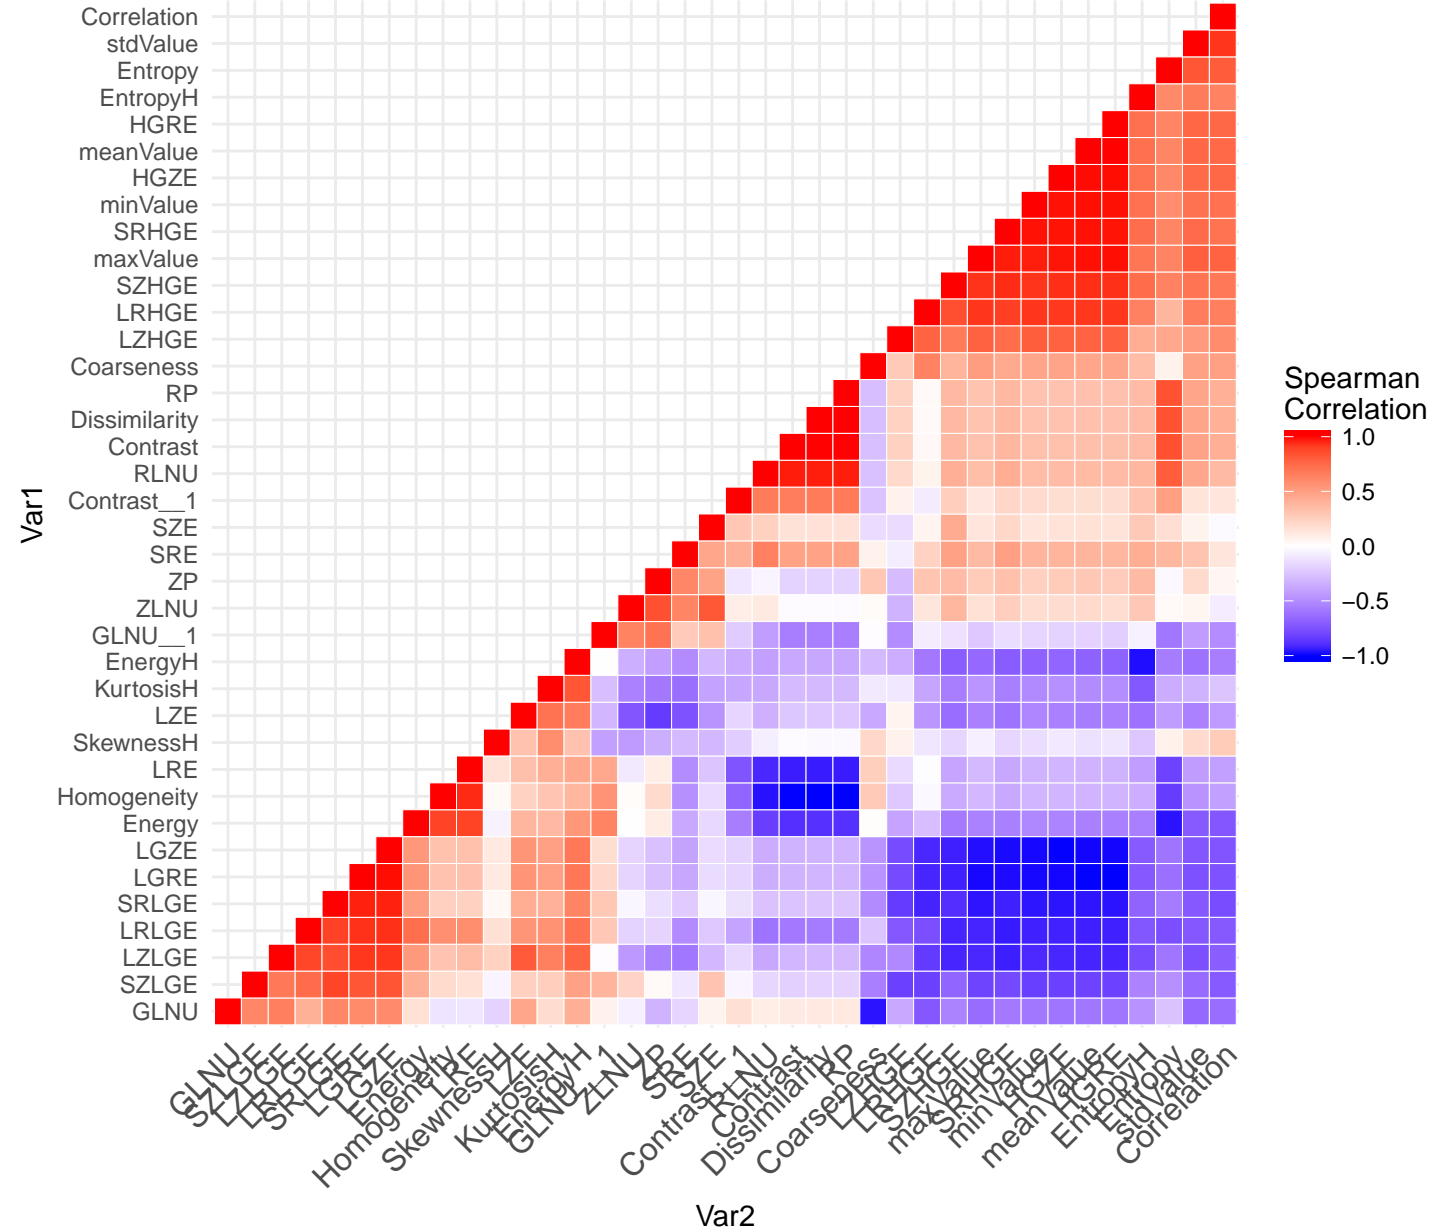

# Relative discretization – Hierarchical clustering

128 gray levels

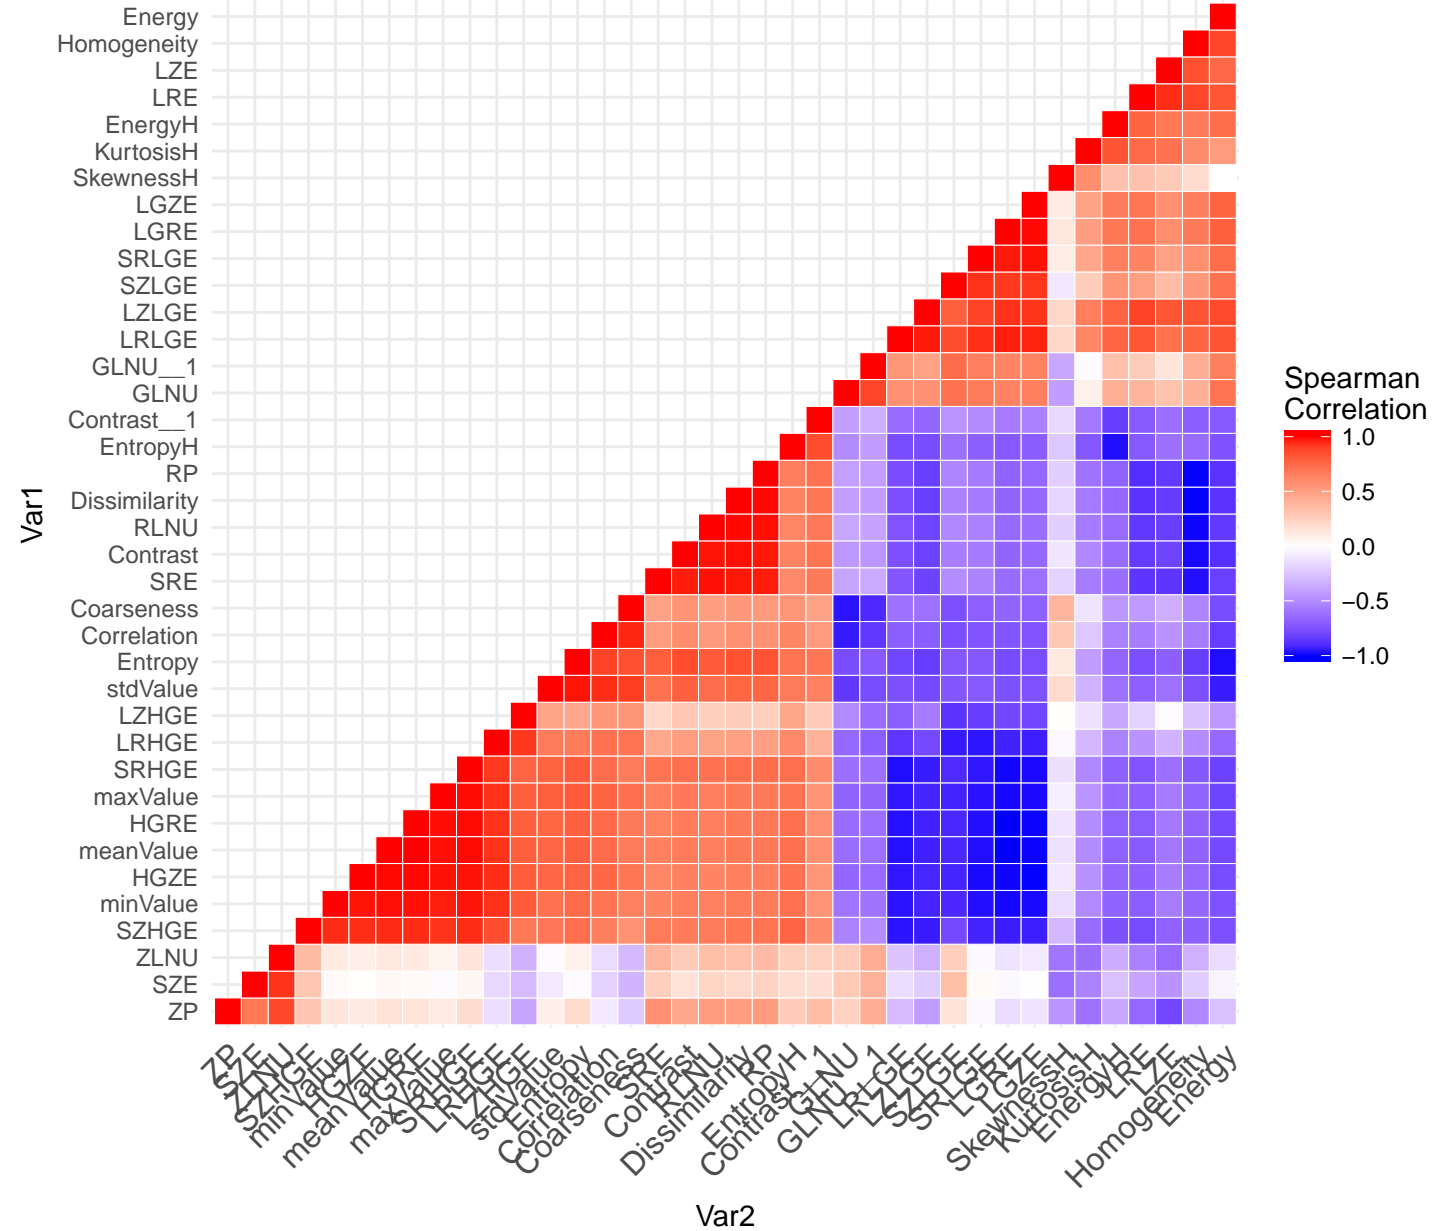

# Relative discretization – Hierarchical clustering

256 gray levels

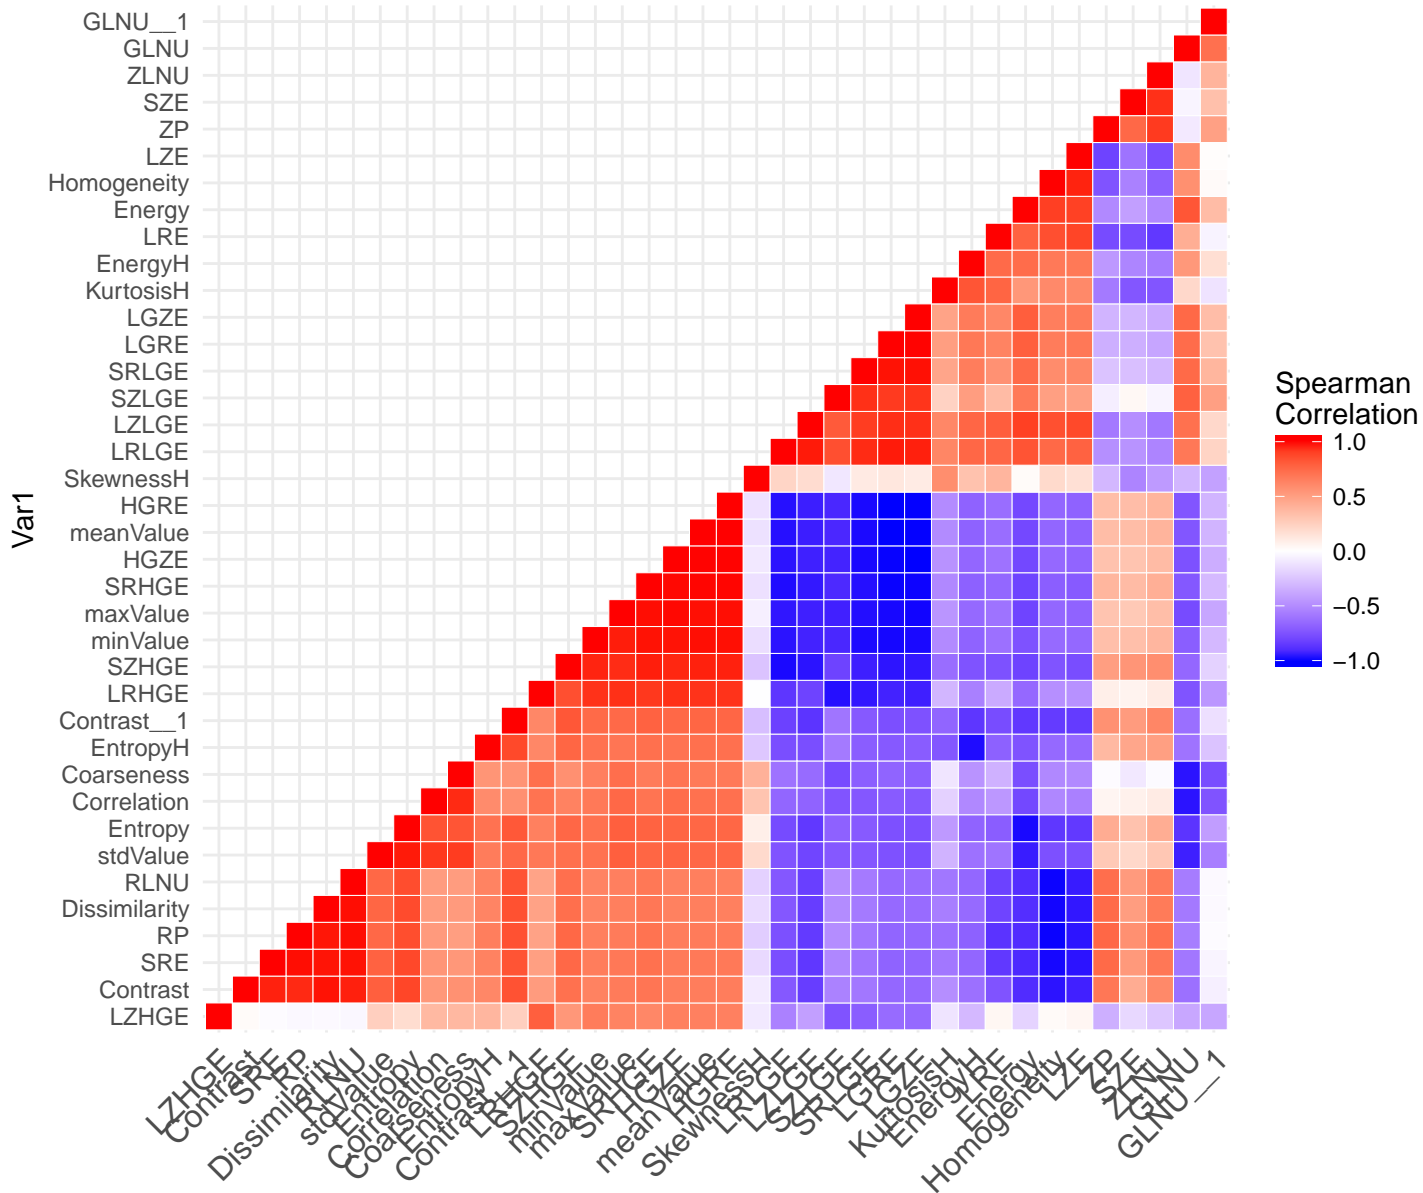

Supplement: DataSheet_1.pdf [file DataSheet_1.pdf]
